# Supplementary material for: Development and evaluation of an advanced National Air Quality Forecast Capability using the NOAA Global Forecast System version 16
Source: Copernicus journal article supplement (doi:10.5194/gmd-2021-316), 2021-10-26
Supplement: Supplementary file 1 [file gmd-2021-316-supplement.pdf]

# Development and evaluation of an advanced National Air Quality Forecast Capability using the NOAA Global Forecast System version 16

Patrick C. Campbell, Youhua Tang, Pius Lee, Barry Baker, Daniel Tong, Rick Saylor, Ariel Stein, Jianping Huang, Ho-Chun Huang, Edward Strobach, Jeff McQueen, Li Pan, Ivanka Stajner, James Sims, Jose Tirado-Delgado, and Youngsun Jung, Fanglin Yang, Tanya L. Spero, and Robert C. Gilliam

## Supporting Information

### LAI in October

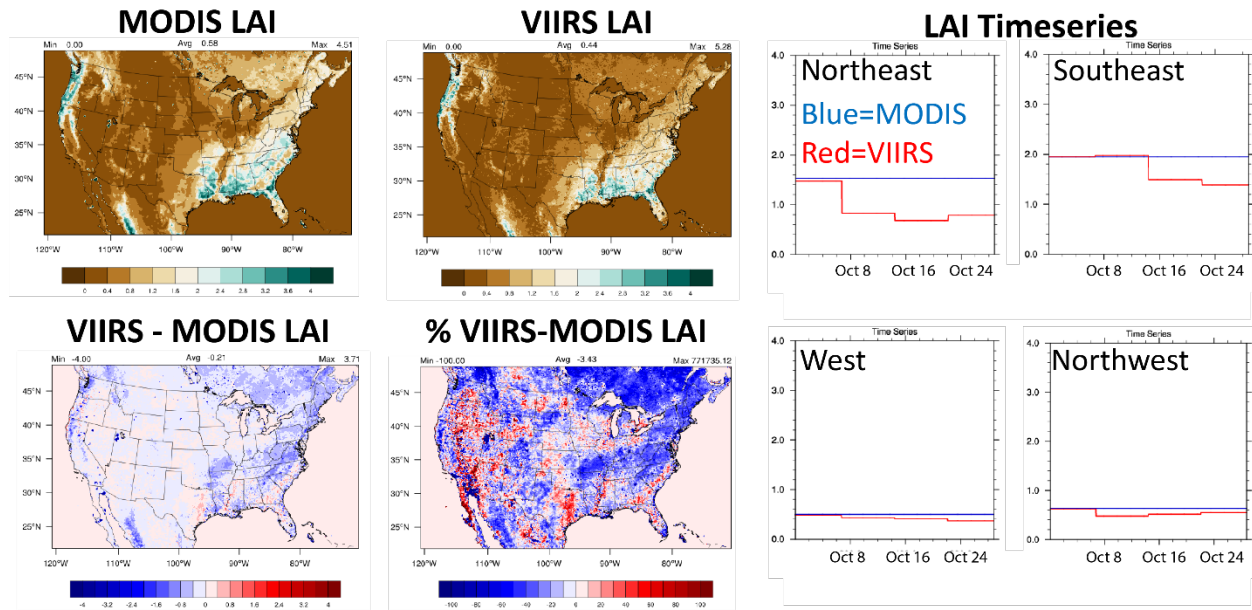

**Figure S1.** Left: Spatial comparison of October average MODIS-IGBP LAI in 2010 and VIIRS LAI in 2020 (top) and their absolute and relative differences (bottom). Right: Time series comparisons of October average MODIS-IGBP LAI in 2010 and VIIRS LAI 8-day product in 2020 for the northeast, southeast, west, and northwest U.S. regions defined by the U.S. EPA geographic regions.

# VEG Fraction in October

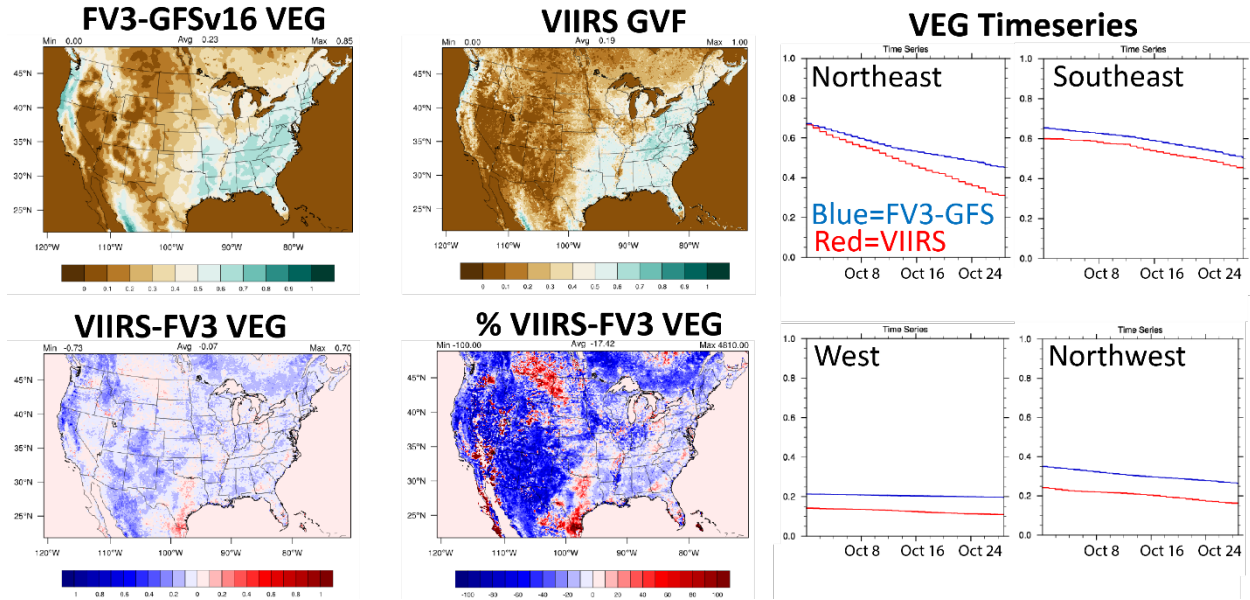

**Figure S2.** Same as in Figure S1, but for VEG fraction comparisons between GFSv16 and VIIRS average 8-day product.

### Isoprene Emissions (g/s)

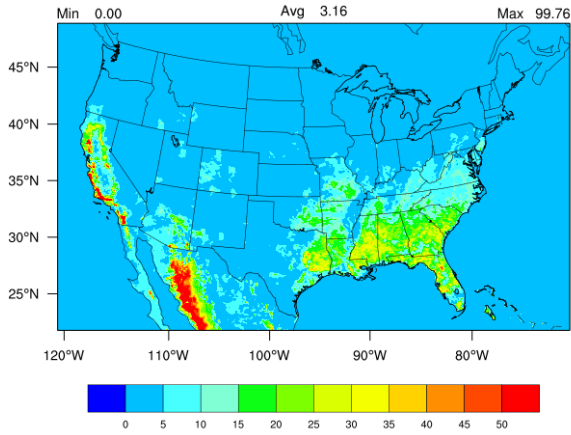

### Isoprene Emissions Relative Change (%)

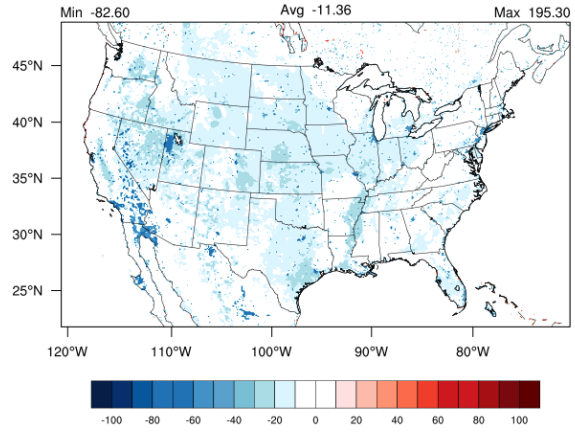

### Terpene Emissions (g/s)

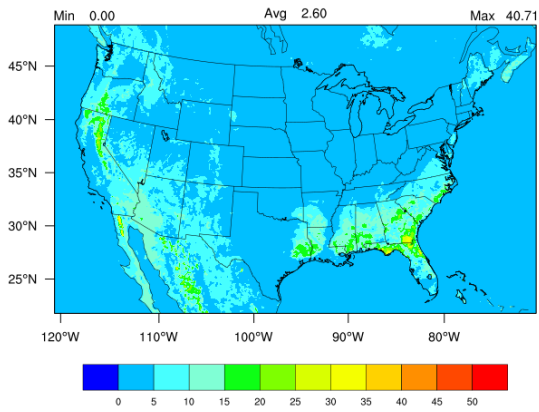

### Terpene Emissions Relative Change (%)

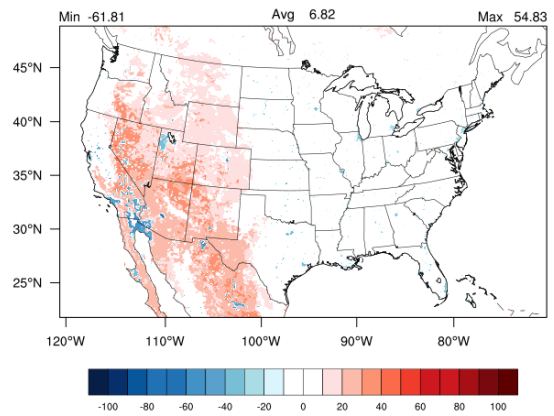

### Ozone Dry Deposition (g/ha)

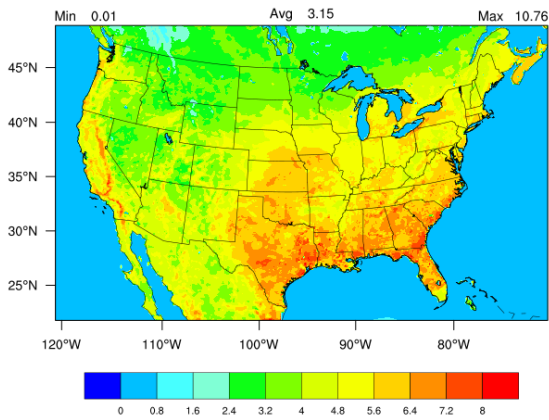

### Ozone Dry Deposition Relative Change (%)

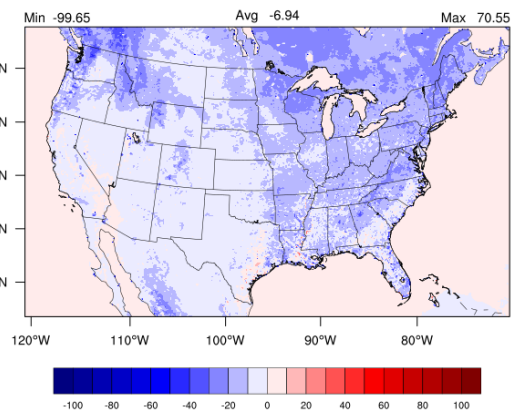

**PM2.5 Ammonium Dry Deposition (g/ha)**

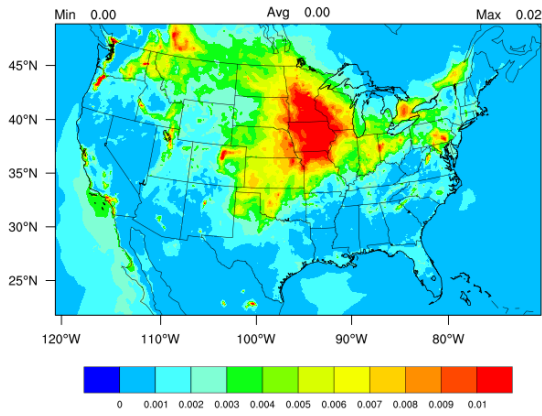

**PM2.5 Ammonium Dry Deposition Change (%)**

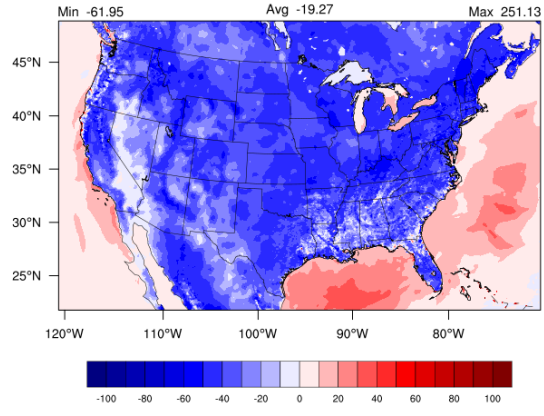

**Ozone Concentration (ppb)**

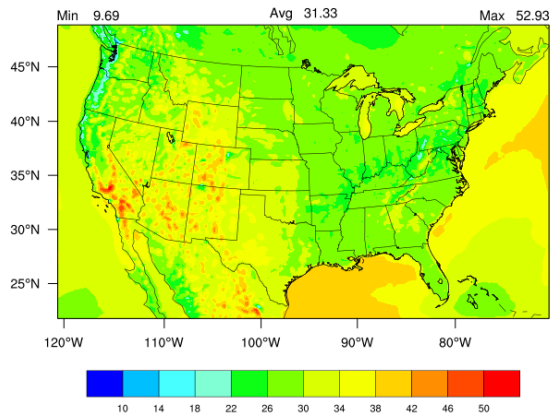

**Ozone Concentration Change (%)**

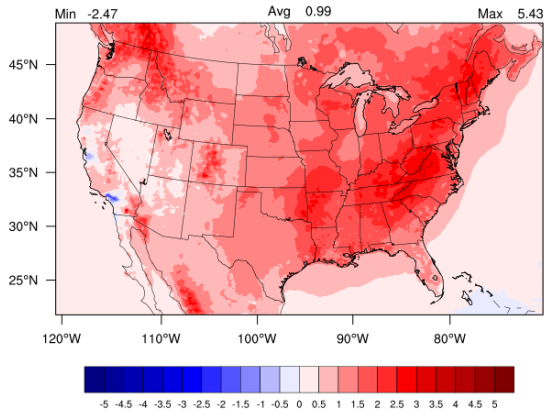

**Total PM2.5 Concentration (ug/m<sup>3</sup>)**

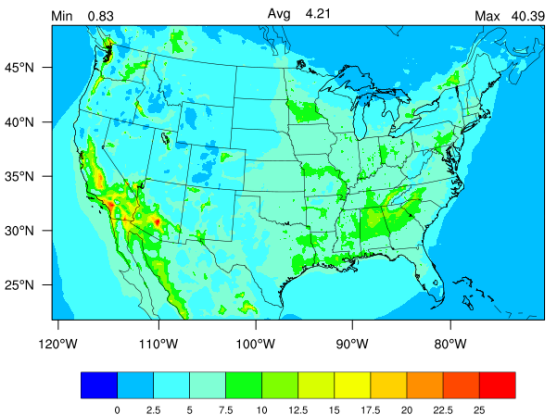

**Total PM2.5 Concentration Change (%)**

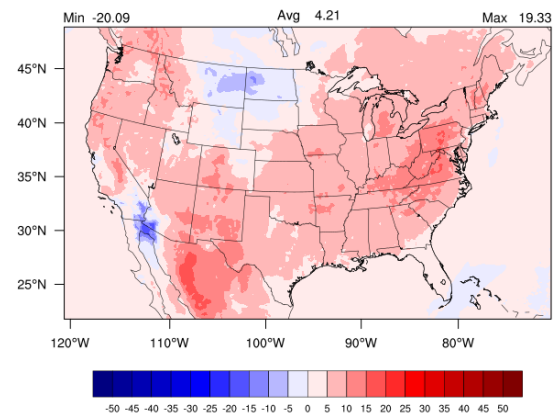

**Figure S3.** Spatial comparison plots of average October 2020 NACC-CMAQ simulation tests with an LAI=4 (left) and relative difference plots (right) with inclusion of VIIRS rapid-refresh (8-day product) of LAI and GVF for isoprene emissions (row 1), terpene emissions (row 2), ozone dry deposition (row 3), fine particulate (PM<sub>2.5</sub>) ammonium dry deposition (row 4), ozone concentration (row 5), and total PM<sub>2.5</sub> concentration.

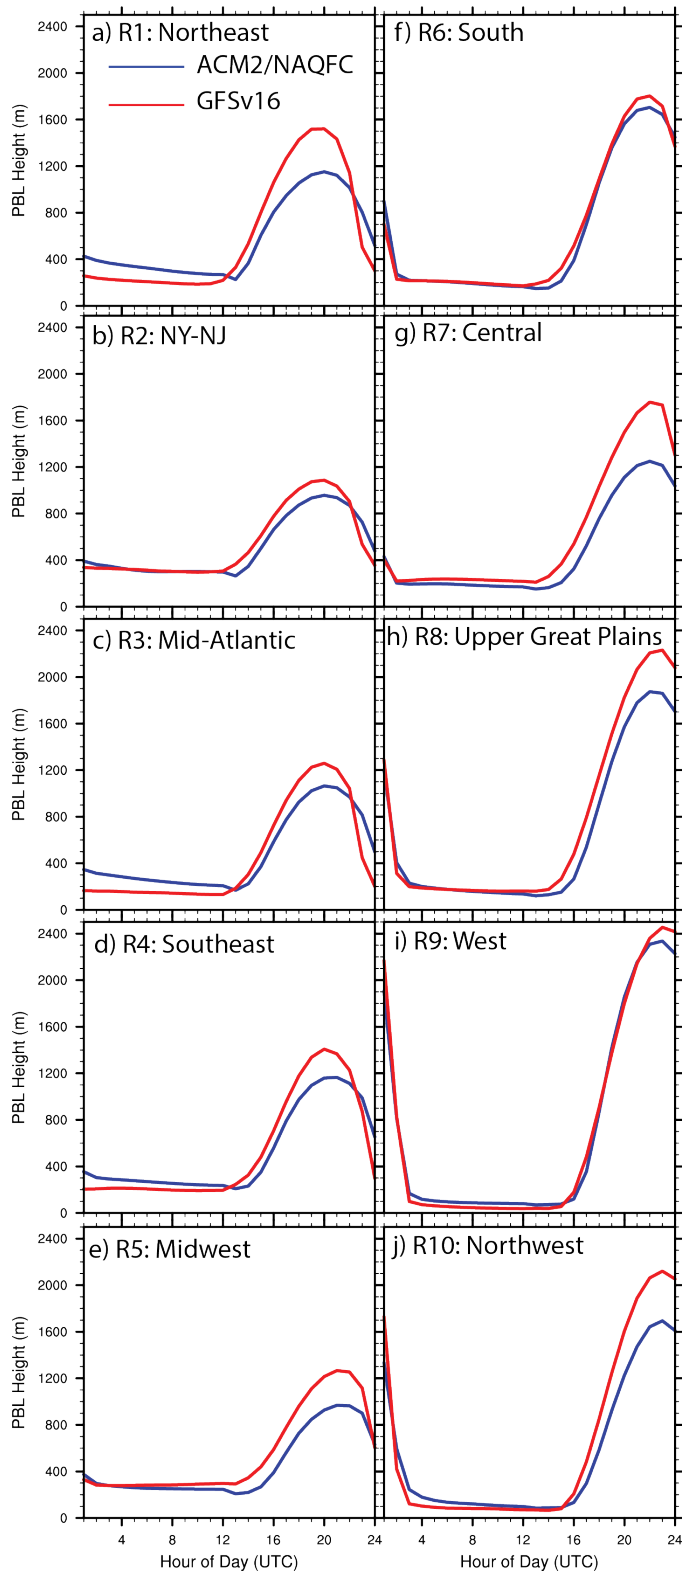

**Figure S4.** Average September 2020 regional diurnal patterns of PBLH (m) for ACM2/NAQFC (blue) and GFSv16 (red) over the CONUS. The regions are based on <https://www.epa.gov/aboutepa/regional-and-geographic-offices>.

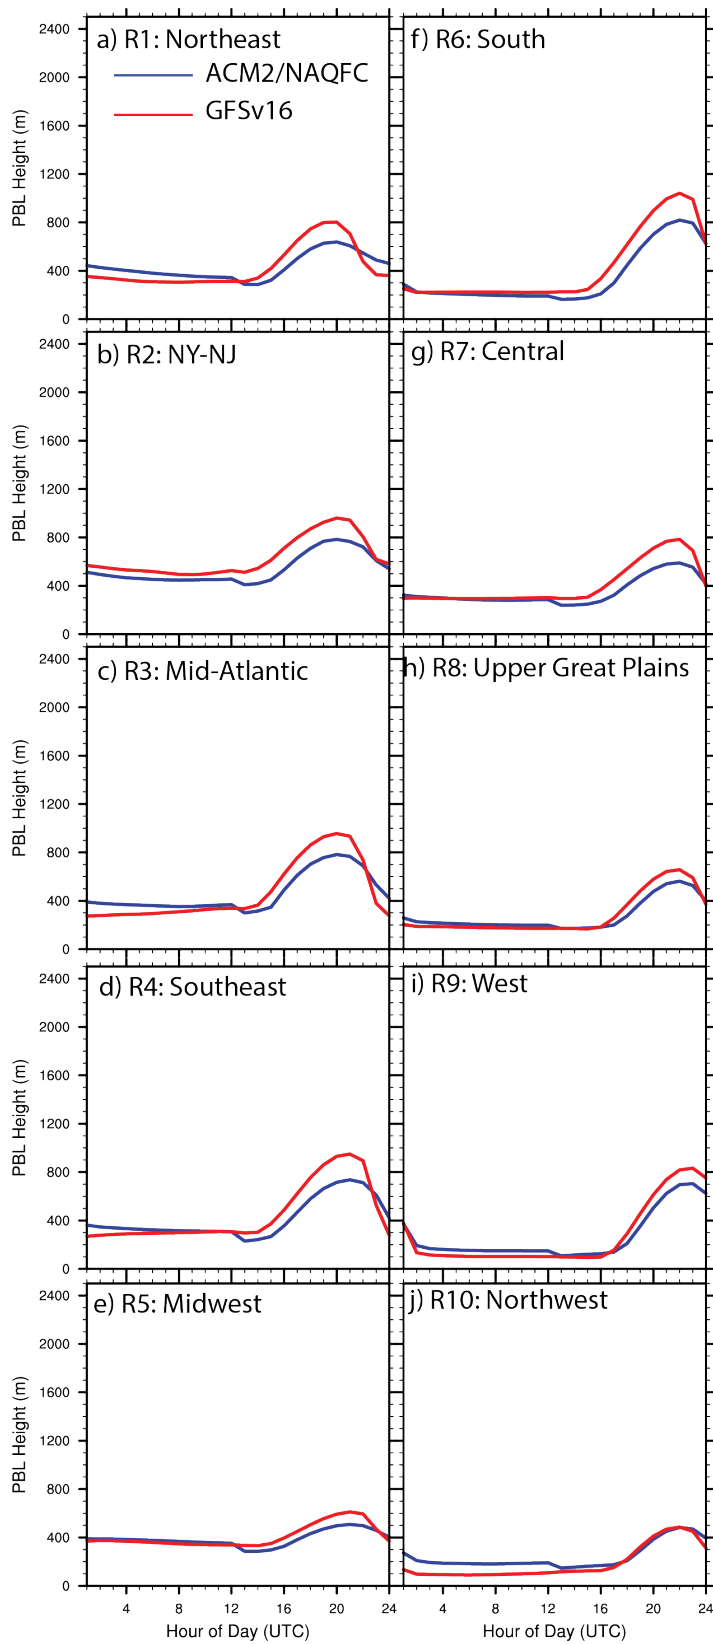

**Figure S5.** Same as Figure S4, but for January 2021.

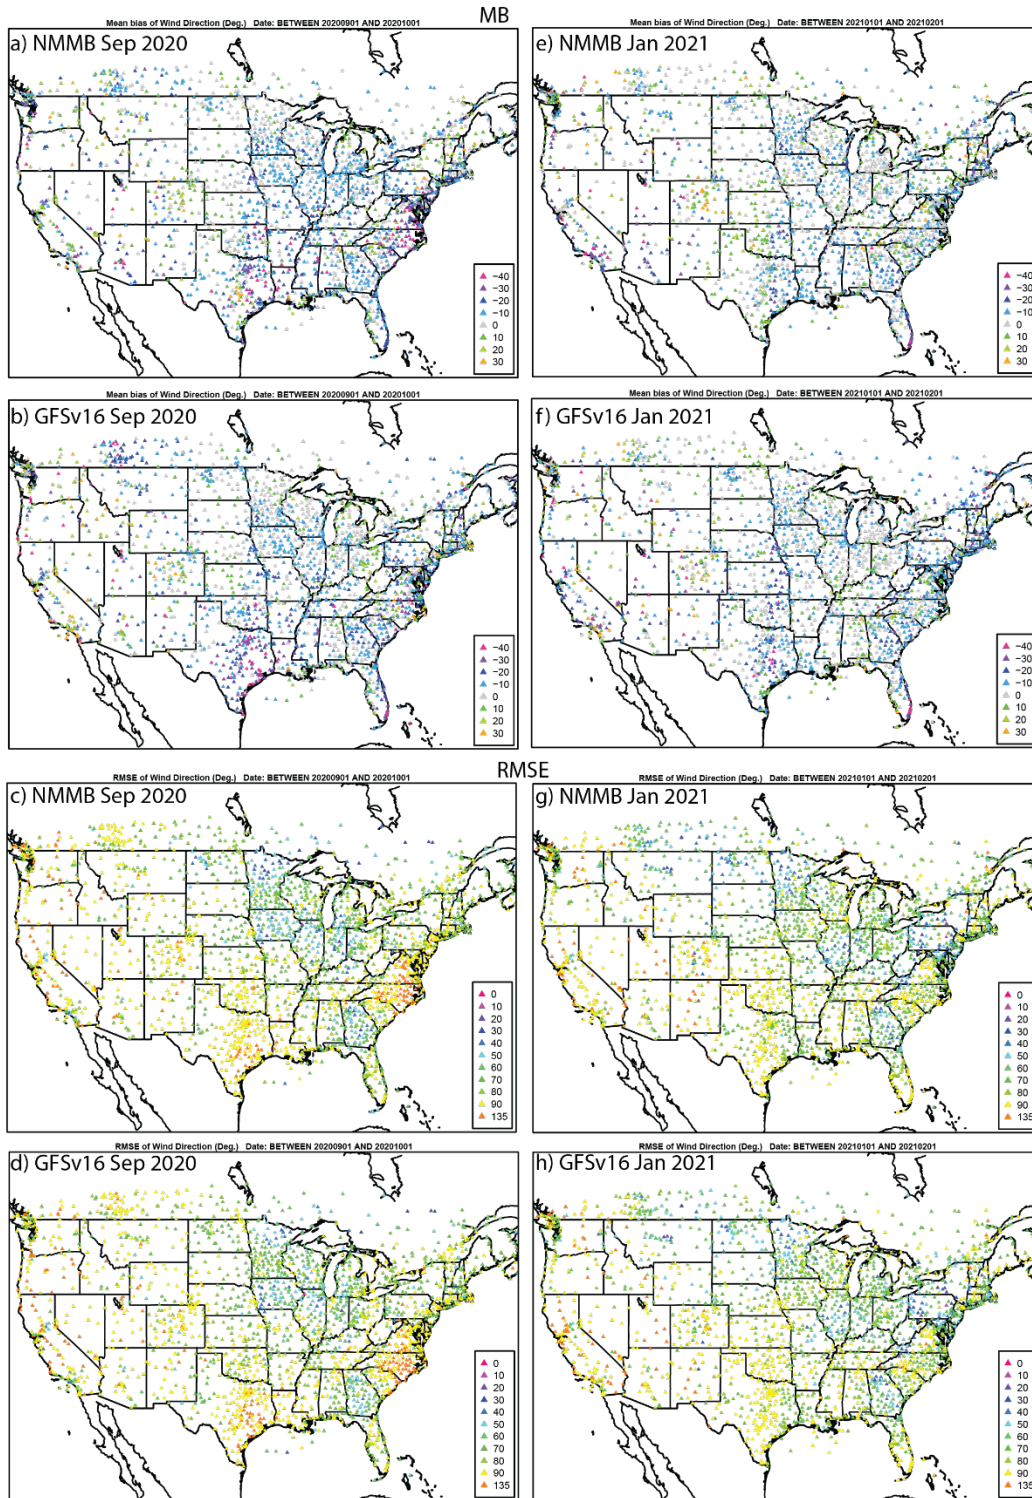

**Figure S6.** Average day 1 (0-24 hr) forecasted WDIR10 MB (degrees) and RMSE (degrees) for NMMB and GFSv16 during a-d) September 2020 and e-h) January 2021 compared to METAR-MADIS observations.



ACC

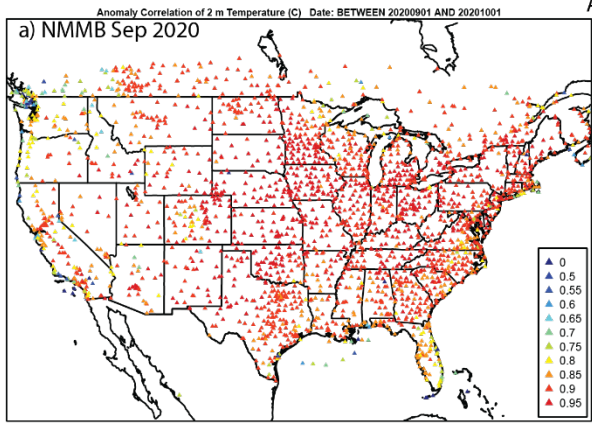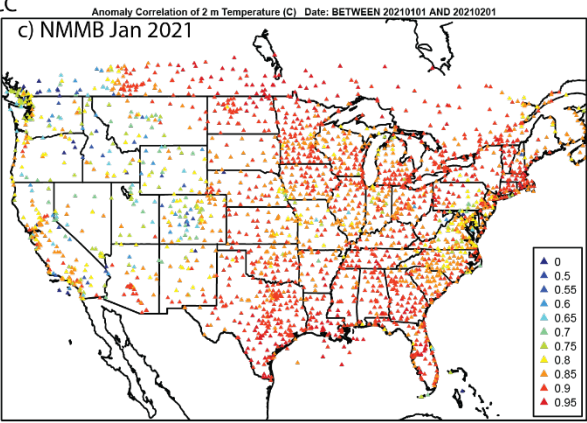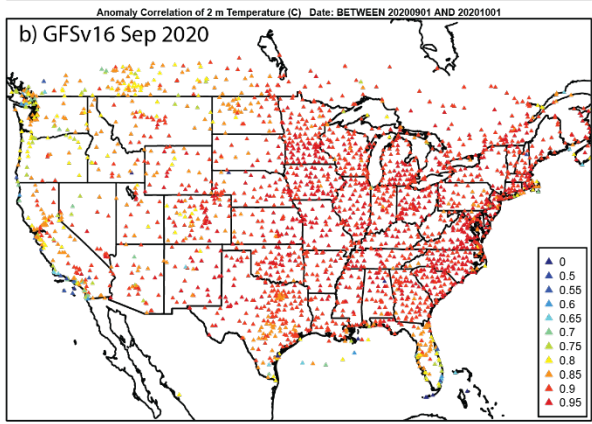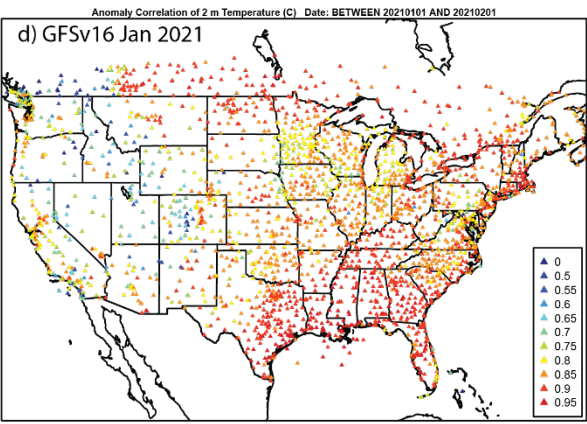

ACC

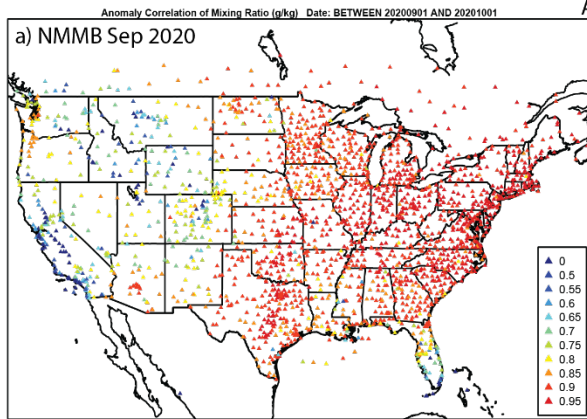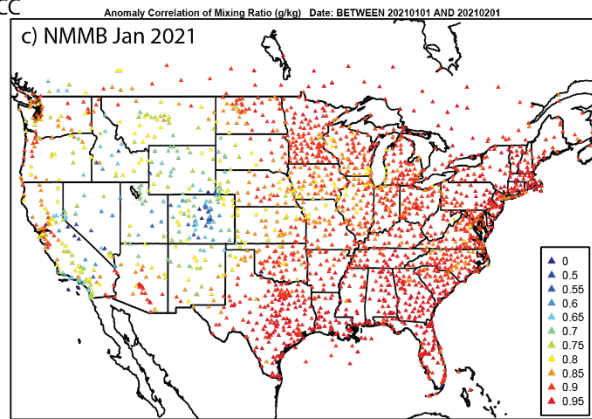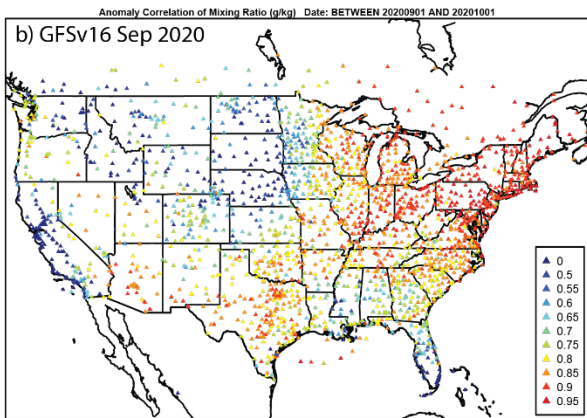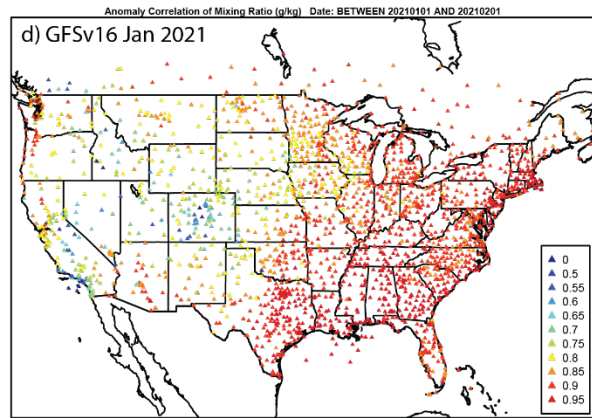

ACC

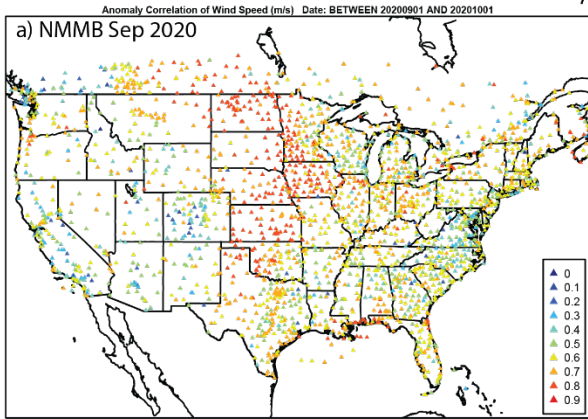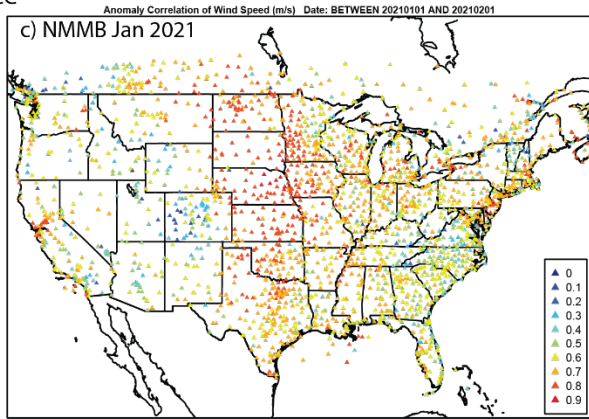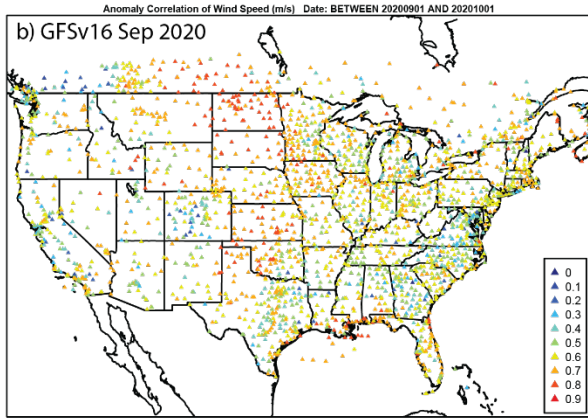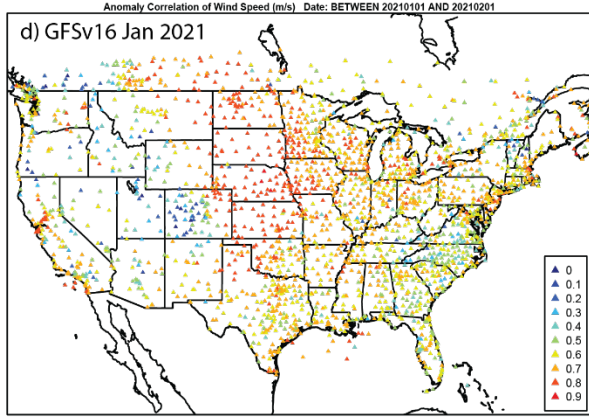

ACC

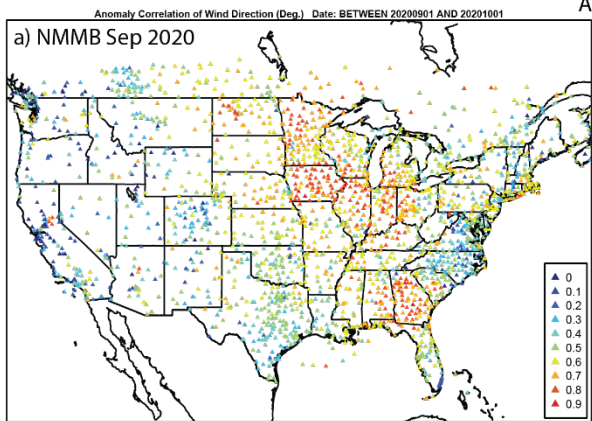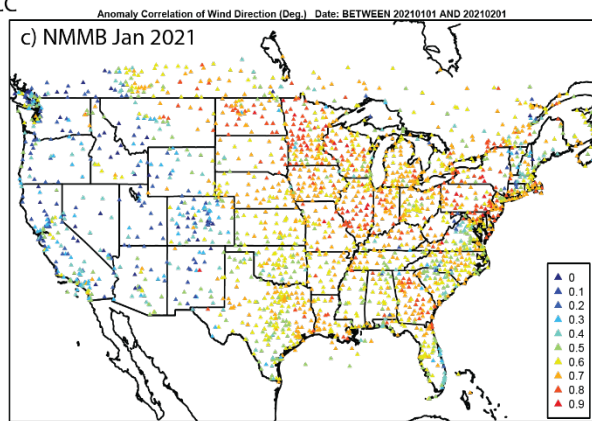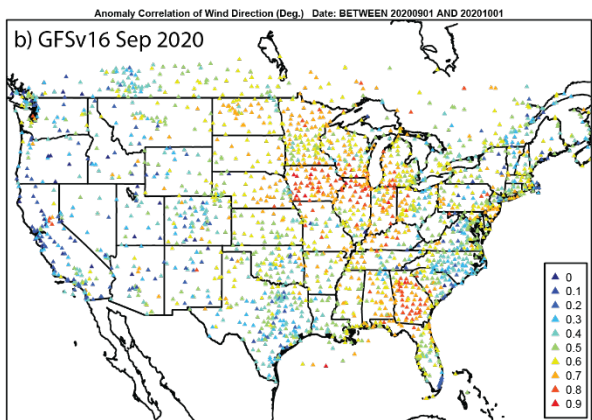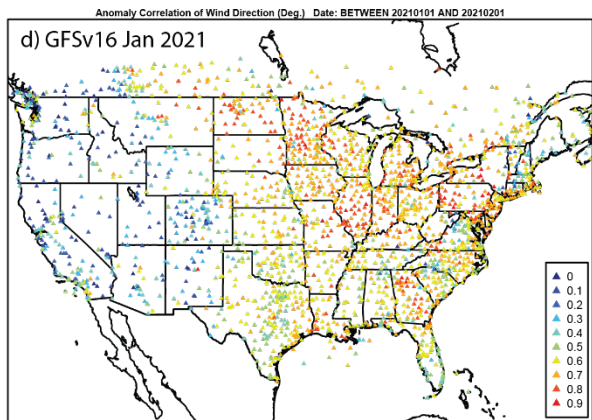

# September 2020

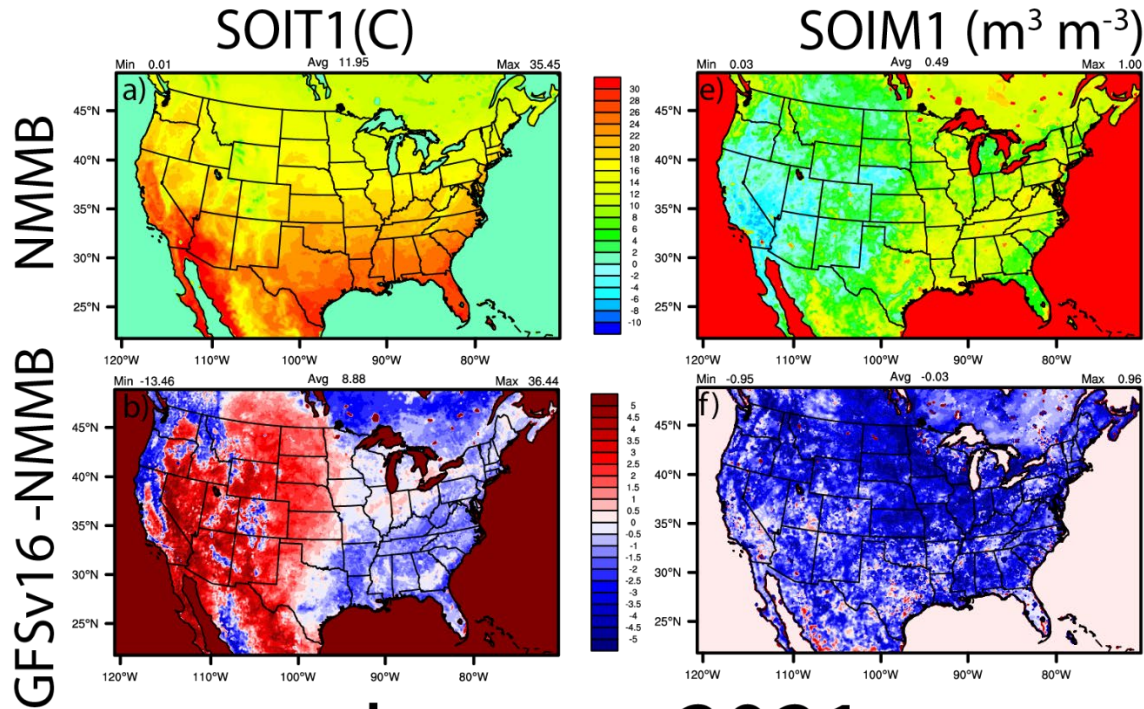

# January 2021

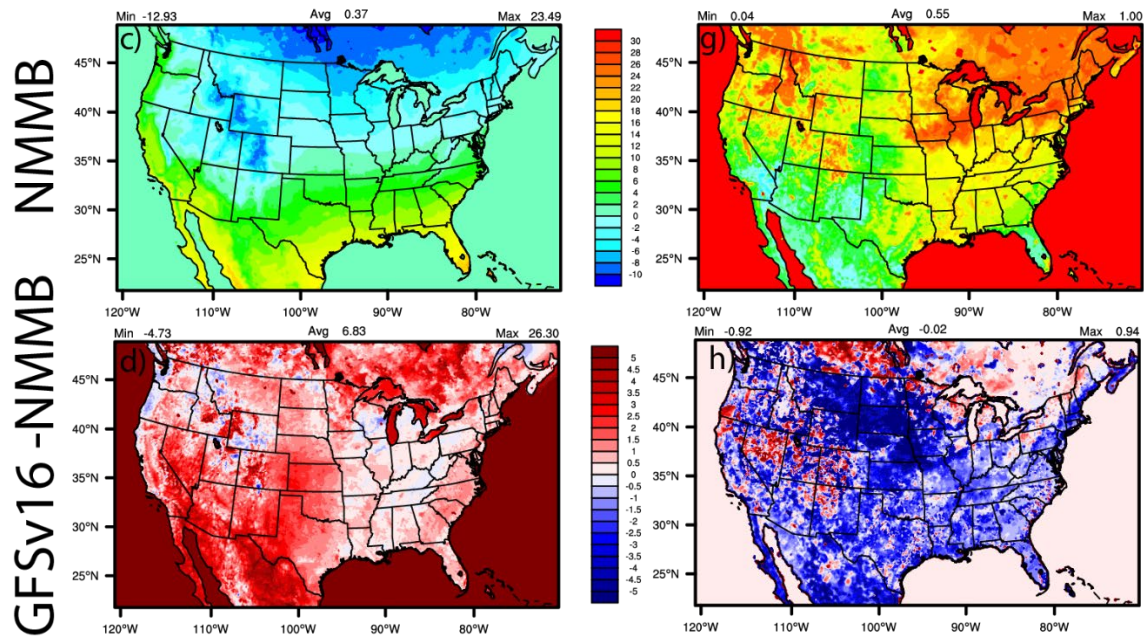

**Figure S11.** September 2020 and January 2021 spatial average plots for NMMB, and the absolute differences for GFSv16 - NMMB for the top layer soil temperature (SOIT1) and soil moisture (SOIM1).

a)

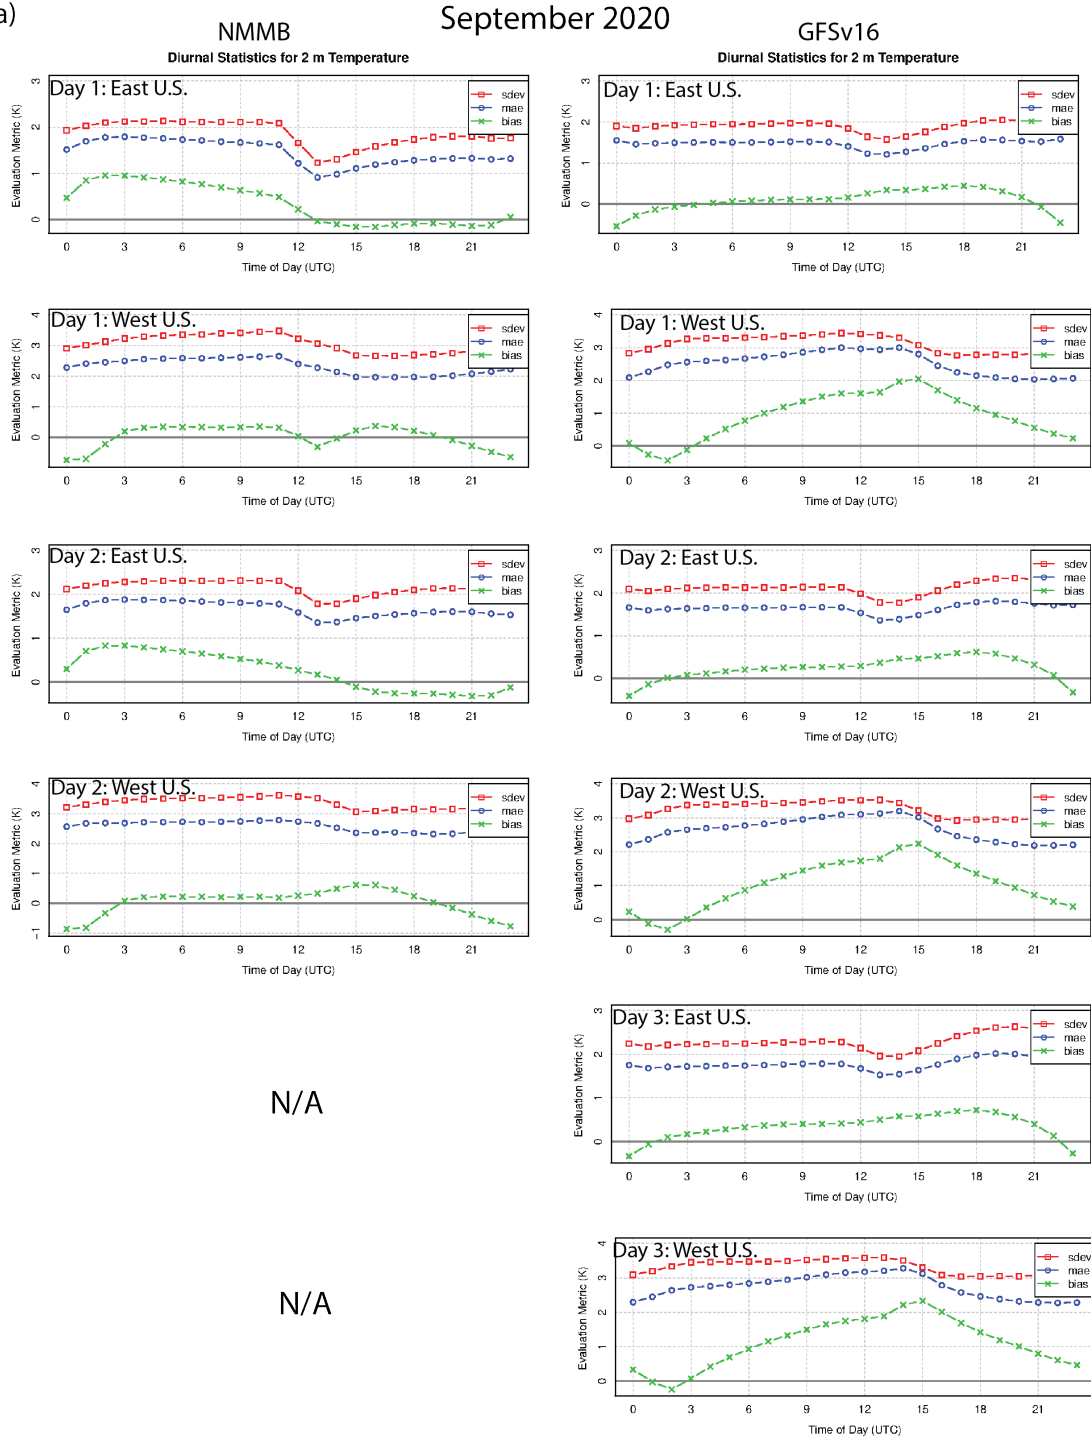

**Figure S12a.** September 2020 average diurnal TEMP2 statistics (red = standard deviation; blue = mean absolute error; green = bias) for day 1, 2, and 3 (GFSv16) forecasts in the east ( $< 100^\circ$  W) and west CONUS ( $> 100^\circ$  W).

b)

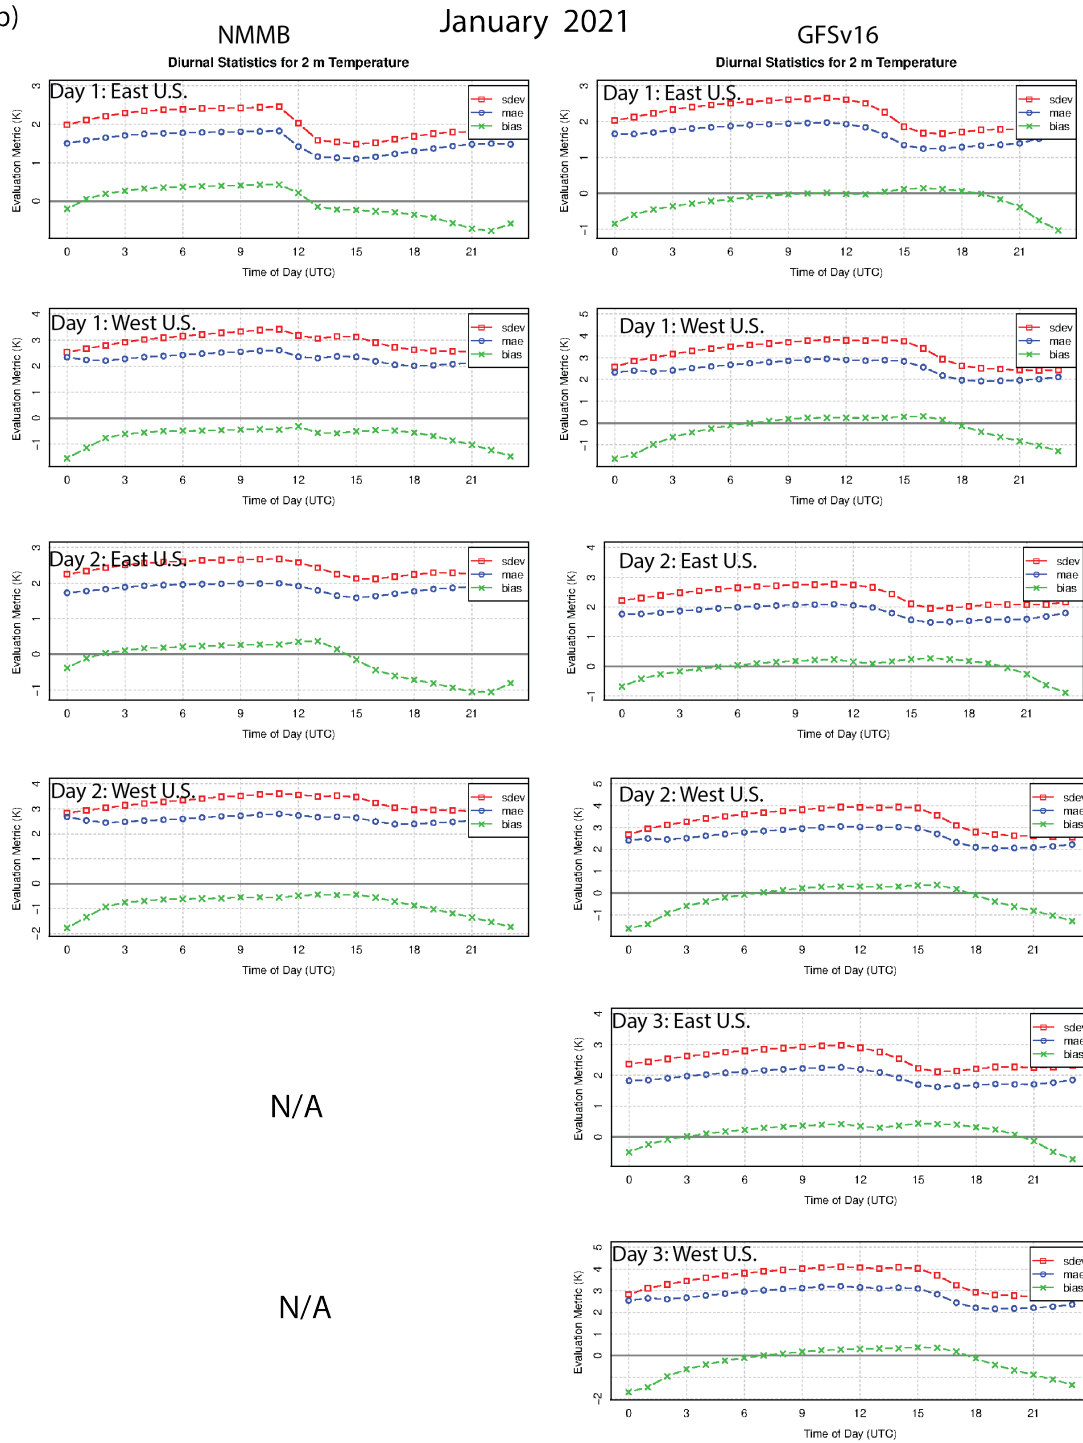

Figure S12b. Same as in Figure S12a, but for January 2021.

a)

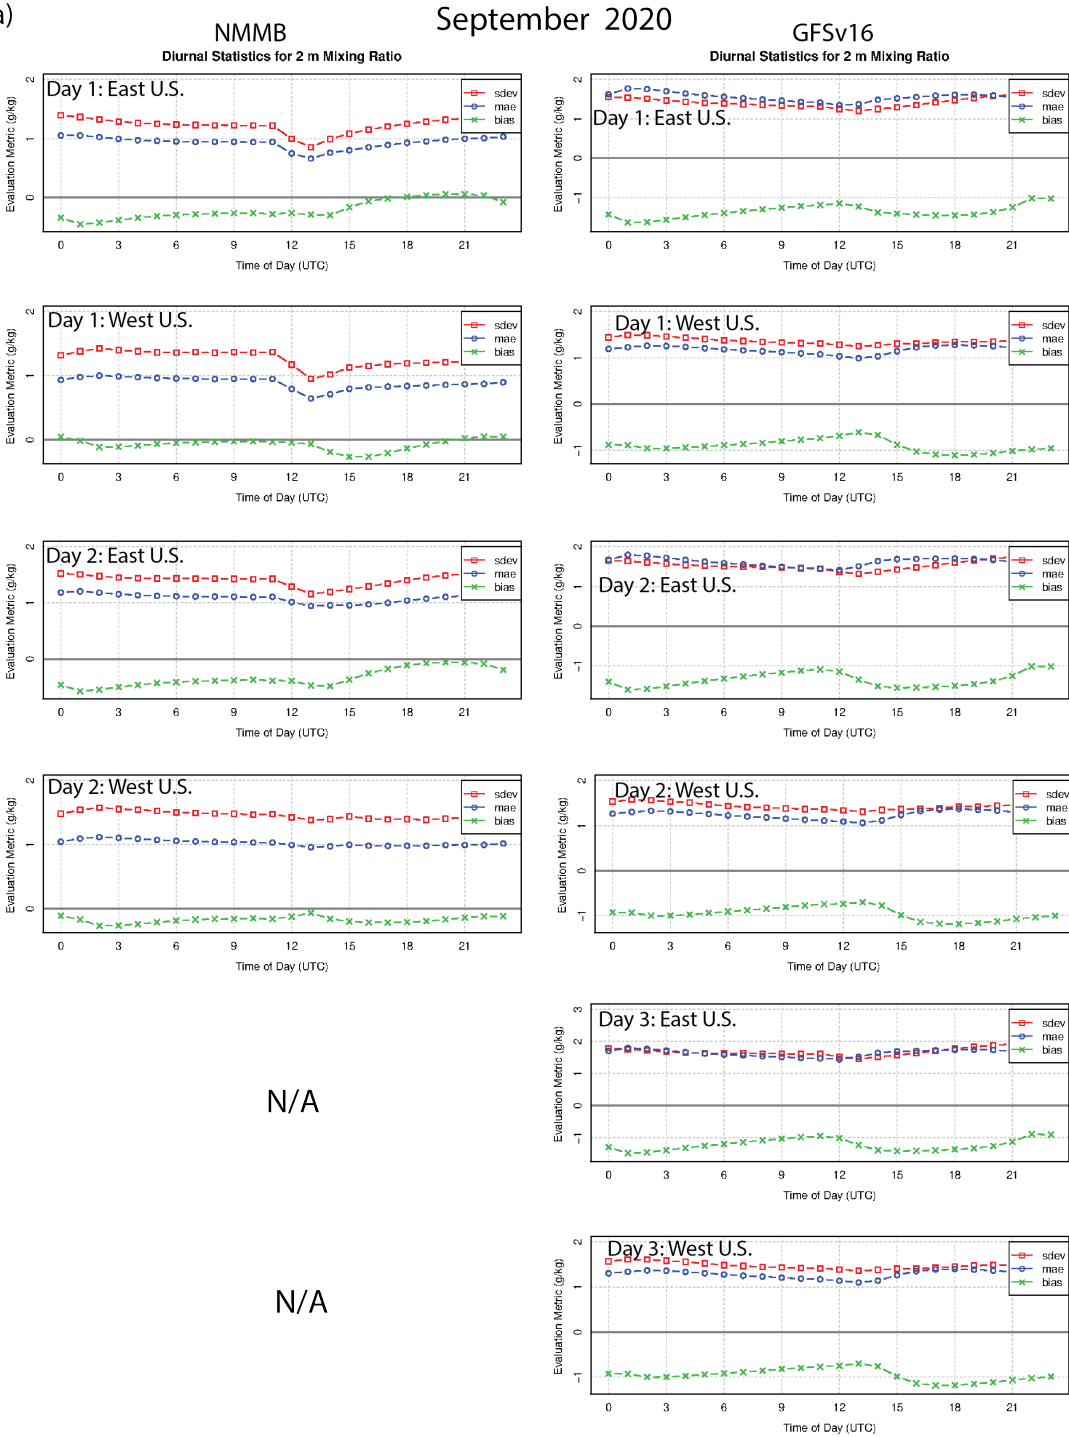

**Figure S13a.** September 2020 average diurnal Q2 statistics (red = standard deviation; blue = mean absolute error; green = bias) for day 1, 2, and 3 (GFSv16) forecasts in the east (< 100° W) and west CONUS (> 100° W).



b)

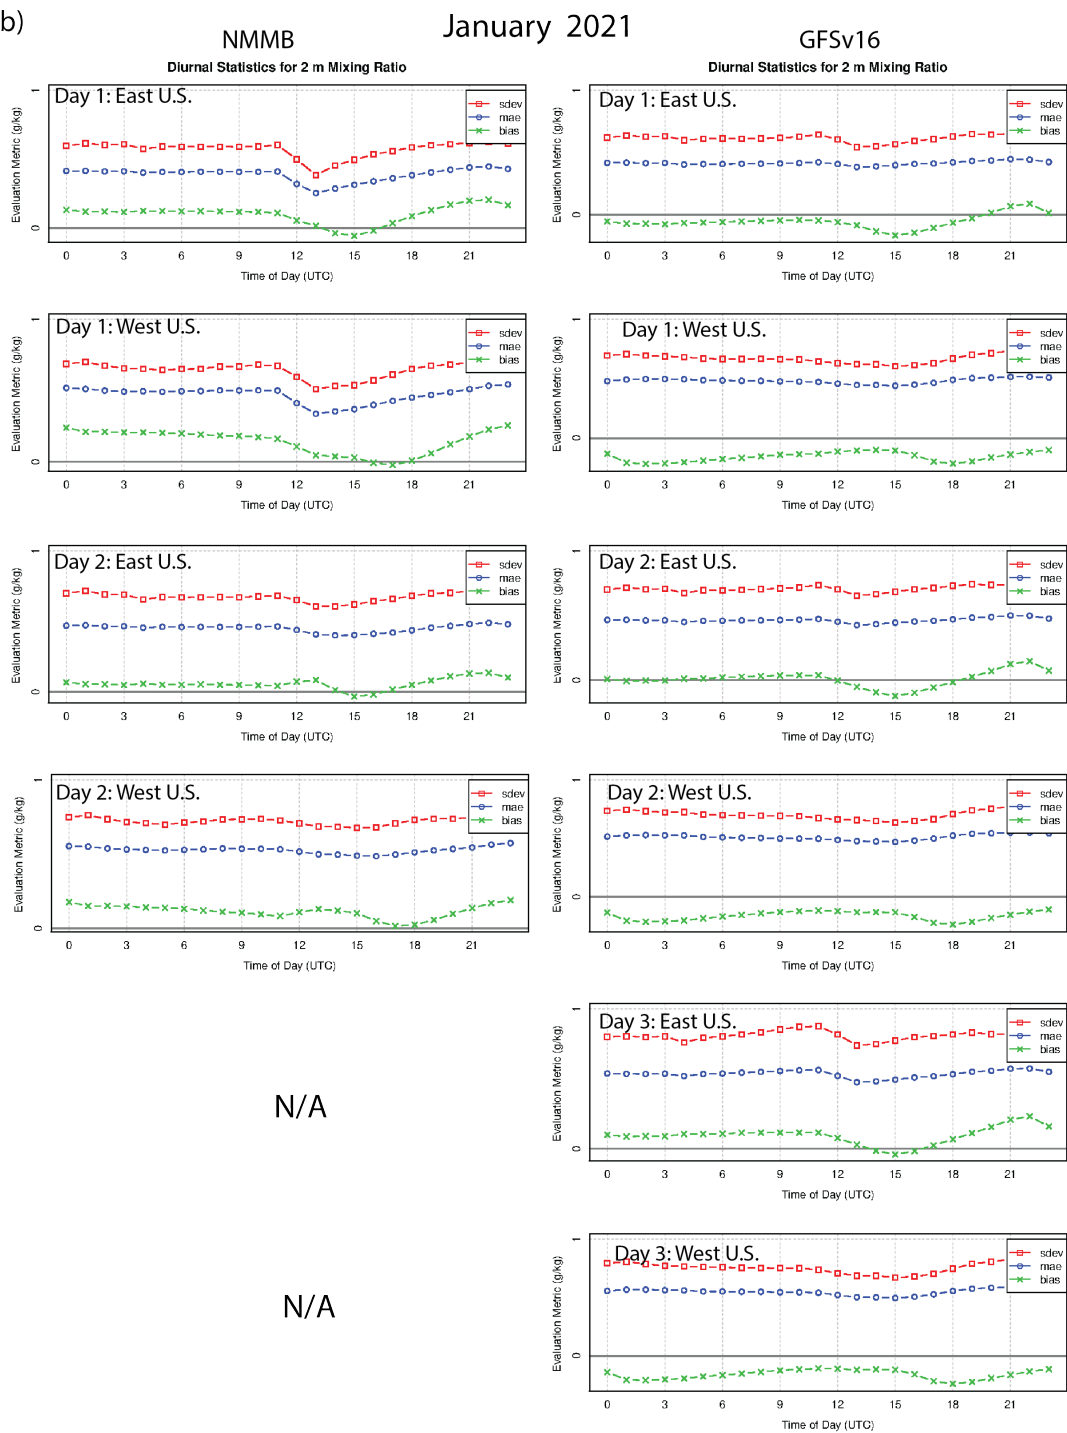

Figure S13b. Same as in Figure S13a, but for January 2021.

a)

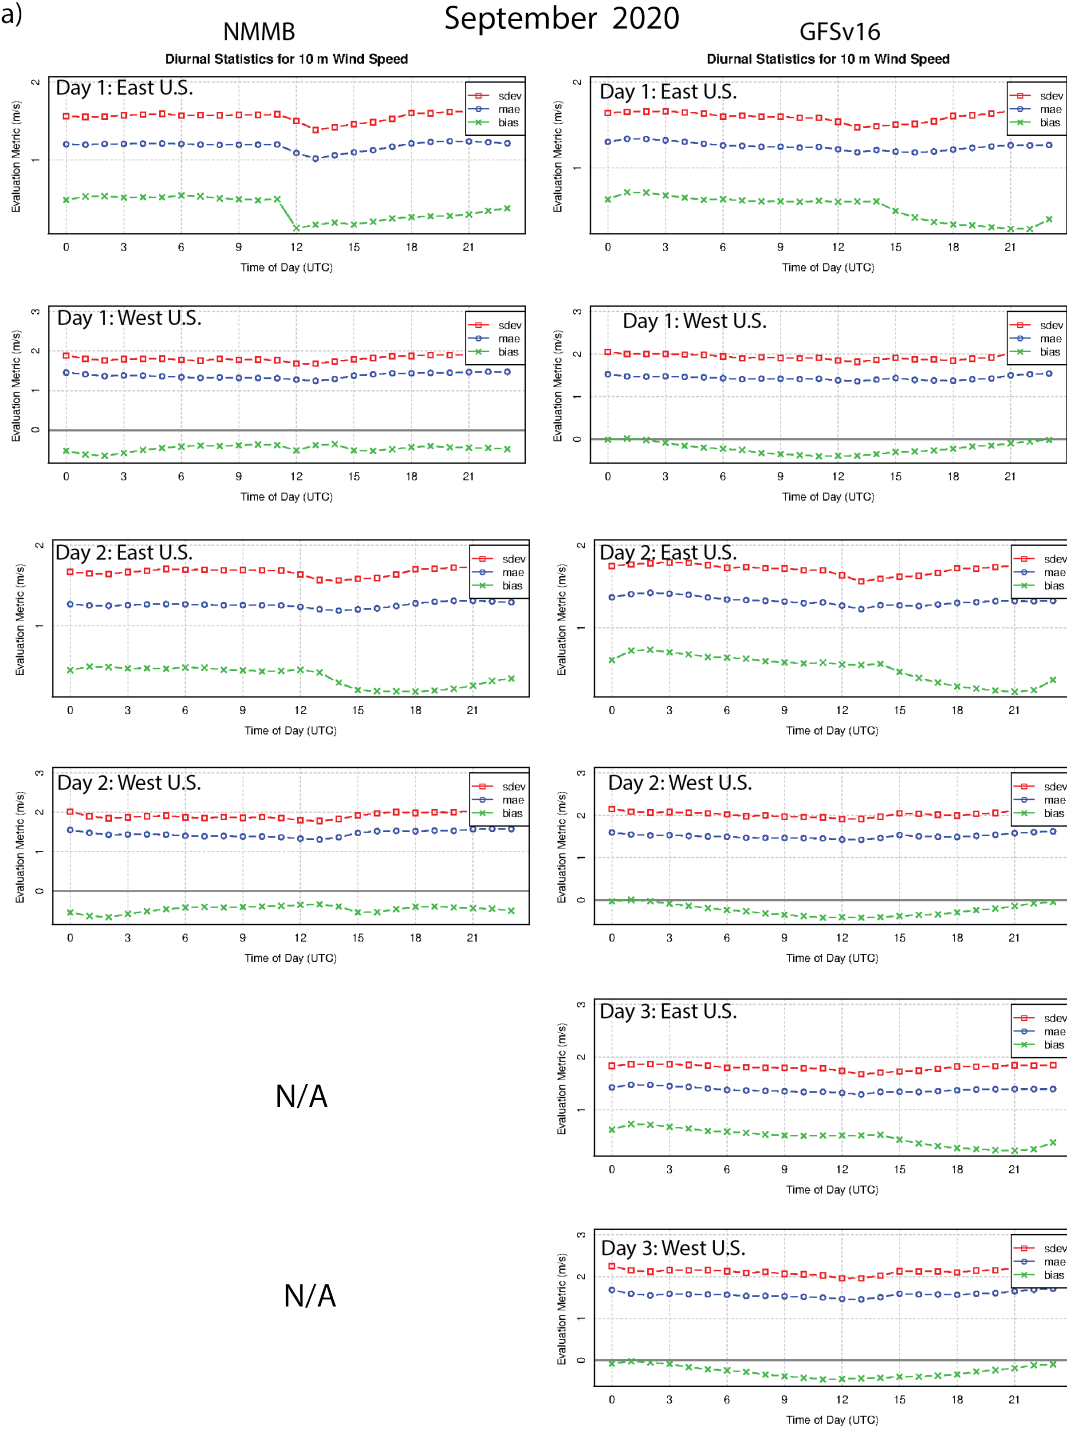

**Figure S14a.** September 2020 average diurnal WSPD10 statistics (red = standard deviation; blue = mean absolute error; green = bias) for day 1, 2, and 3 (GFSv16) forecasts in the east ( $< 100^\circ$  W) and west CONUS ( $> 100^\circ$  W).

b)

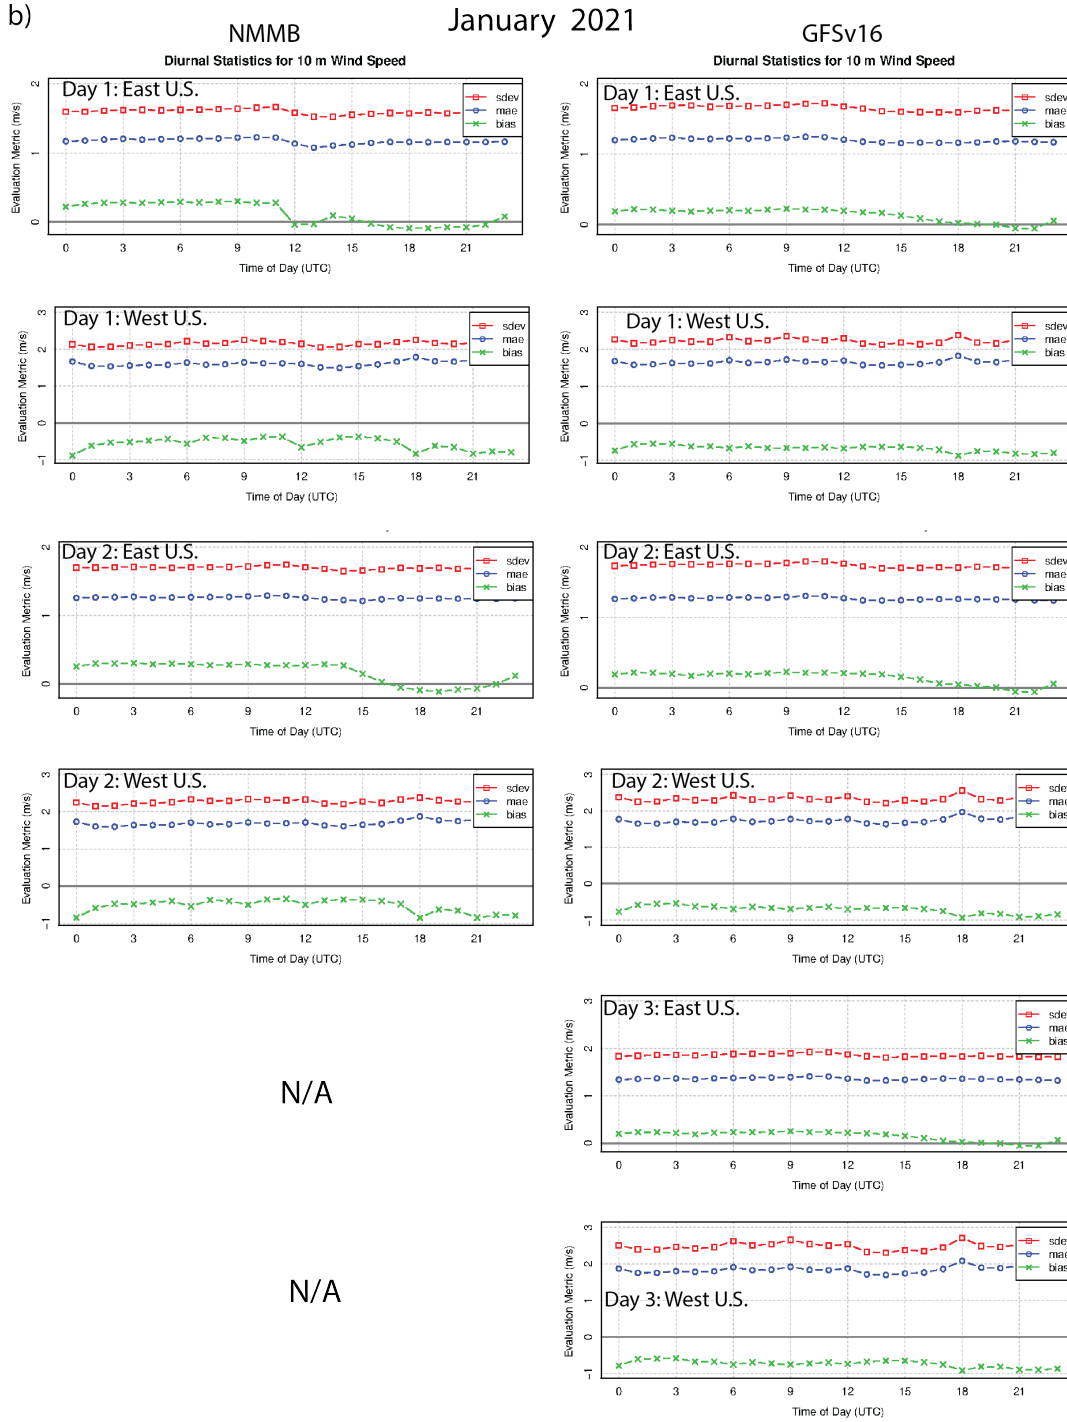

**Figure S14b.** Same as in Figure S14a, but for January 2021.

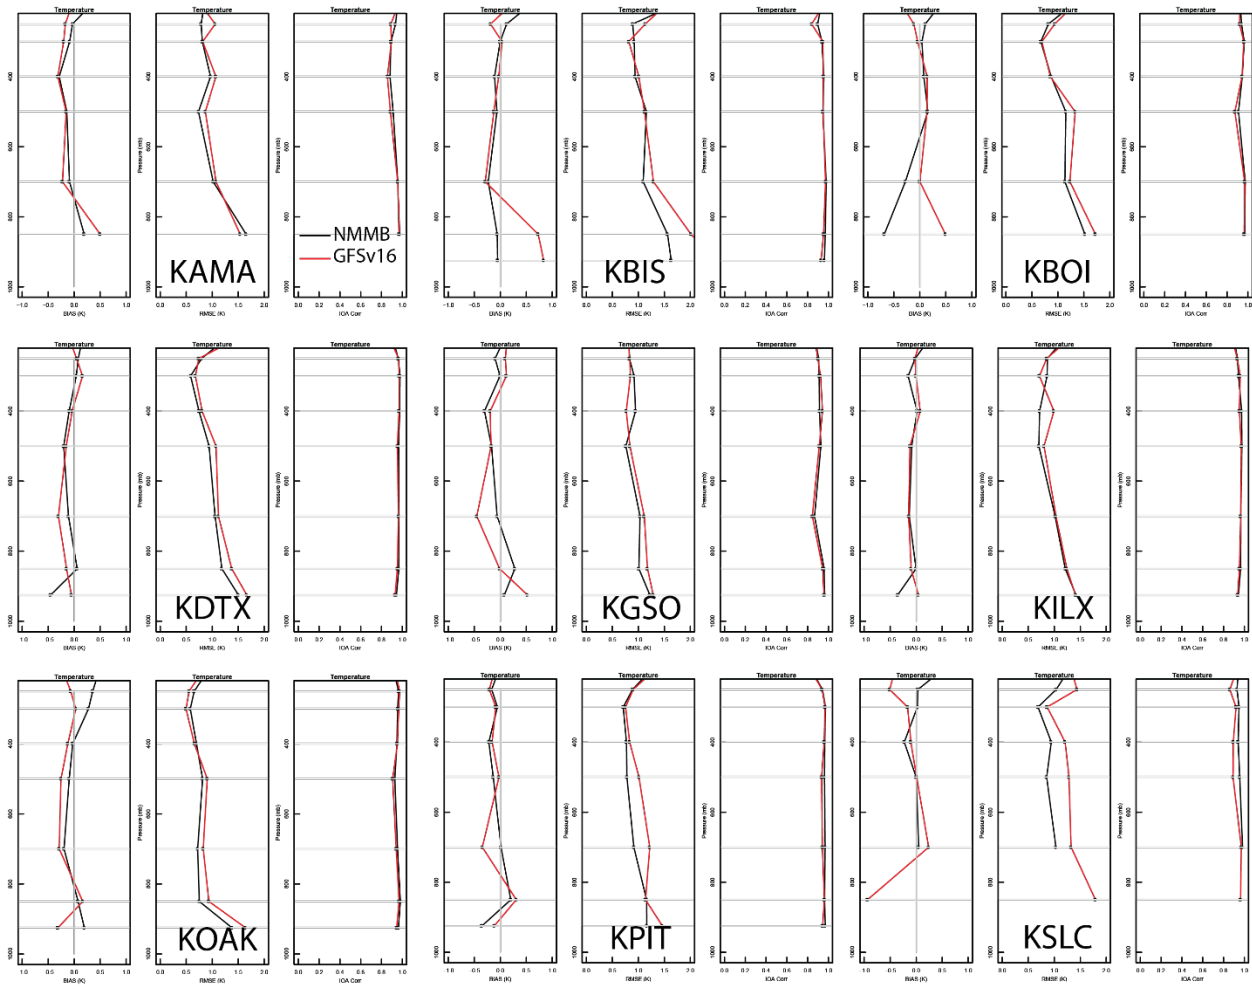

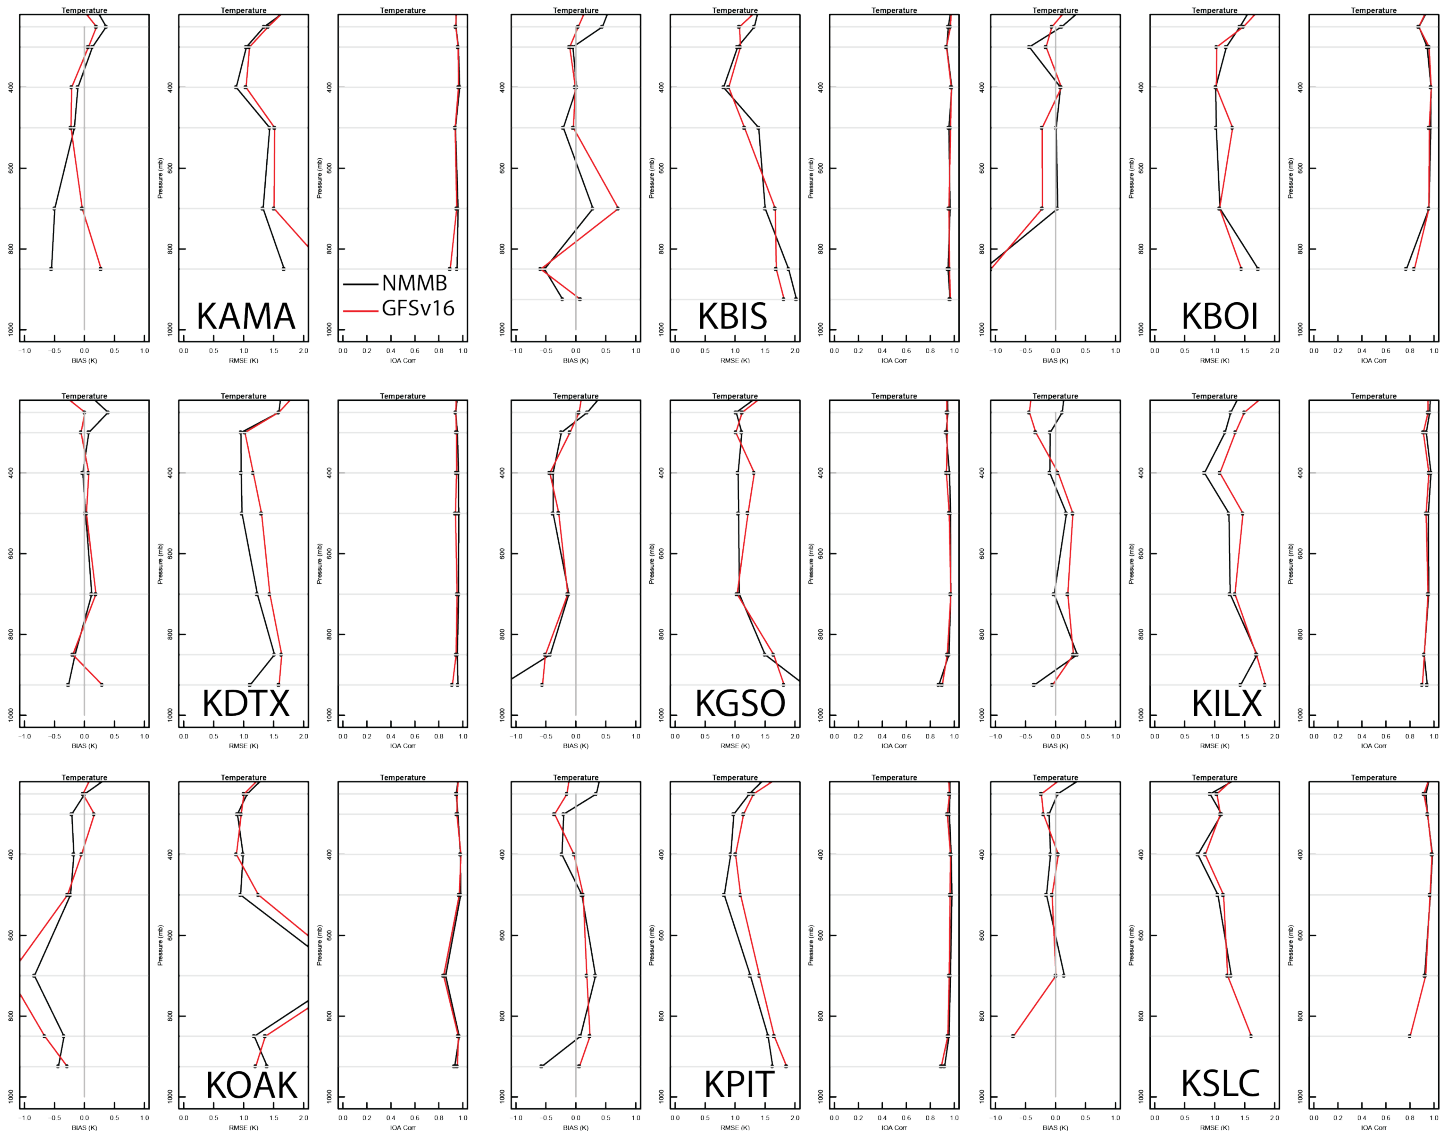

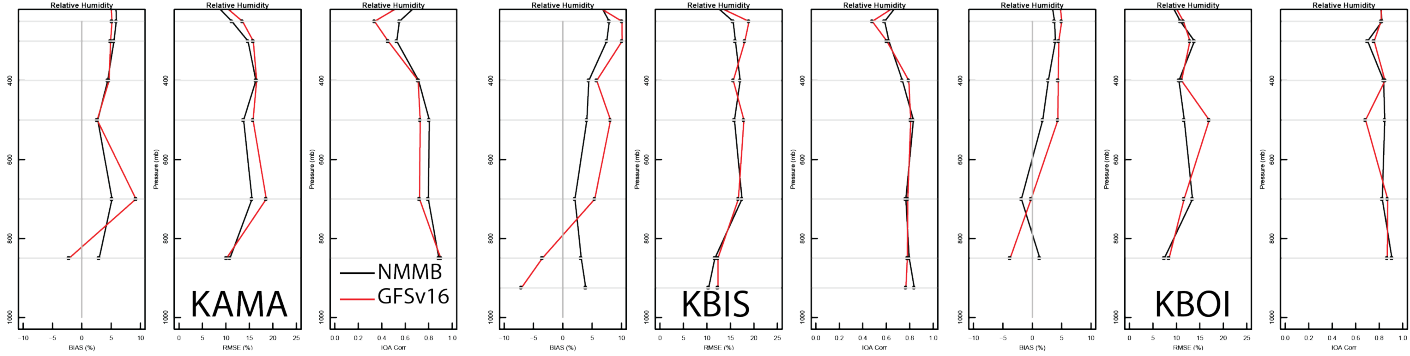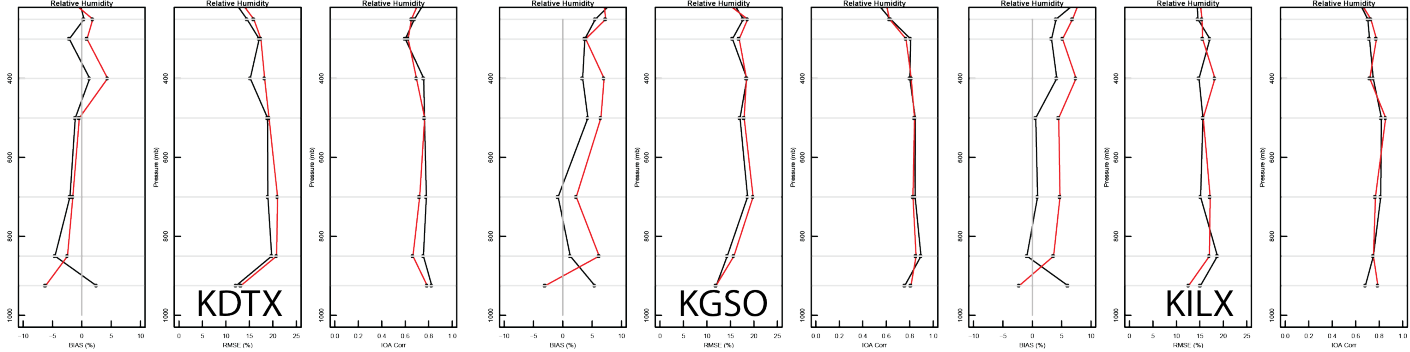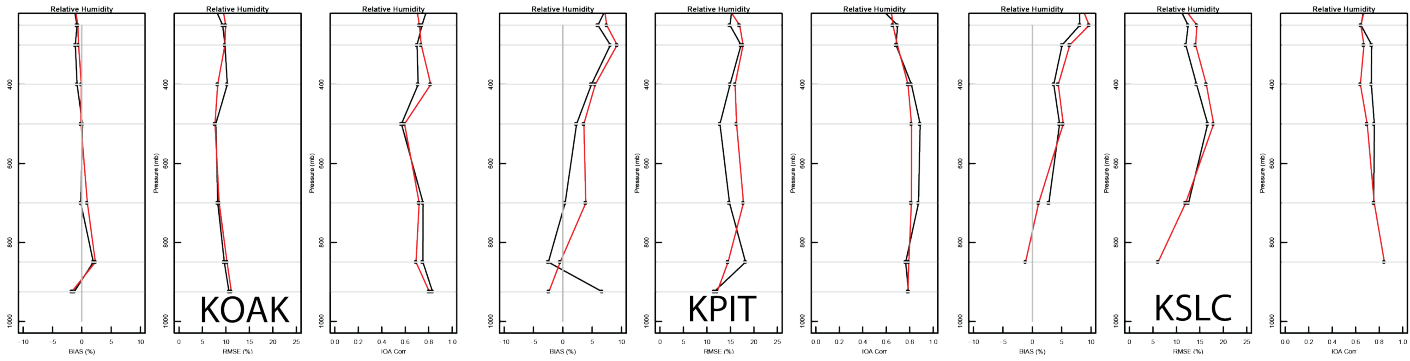

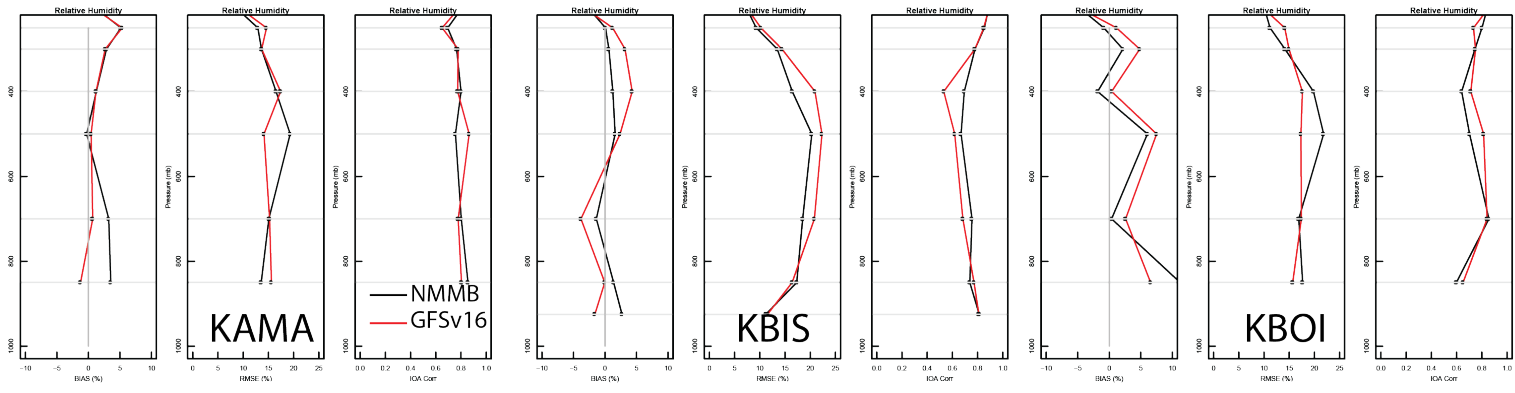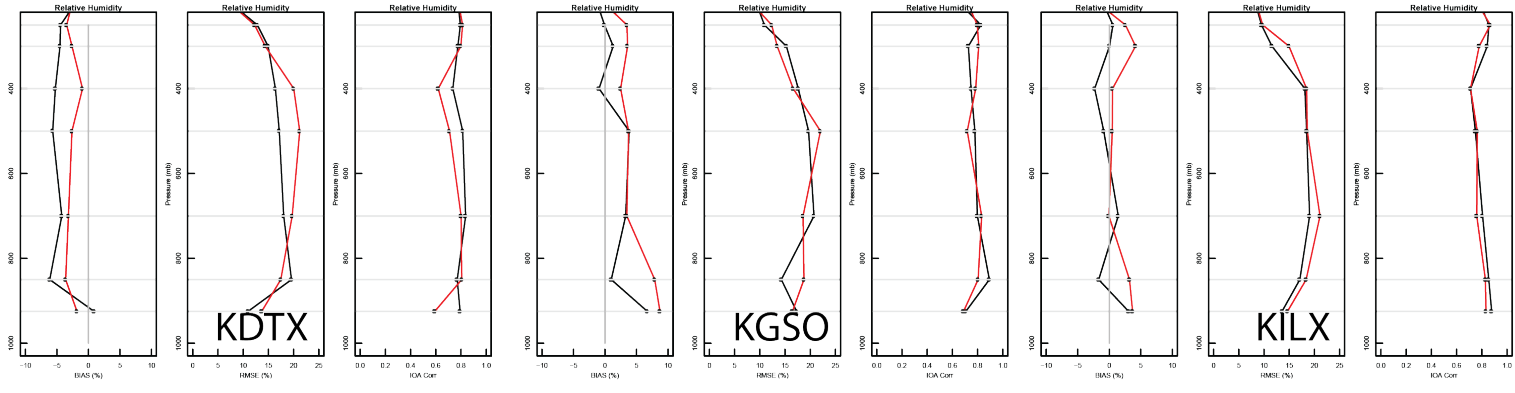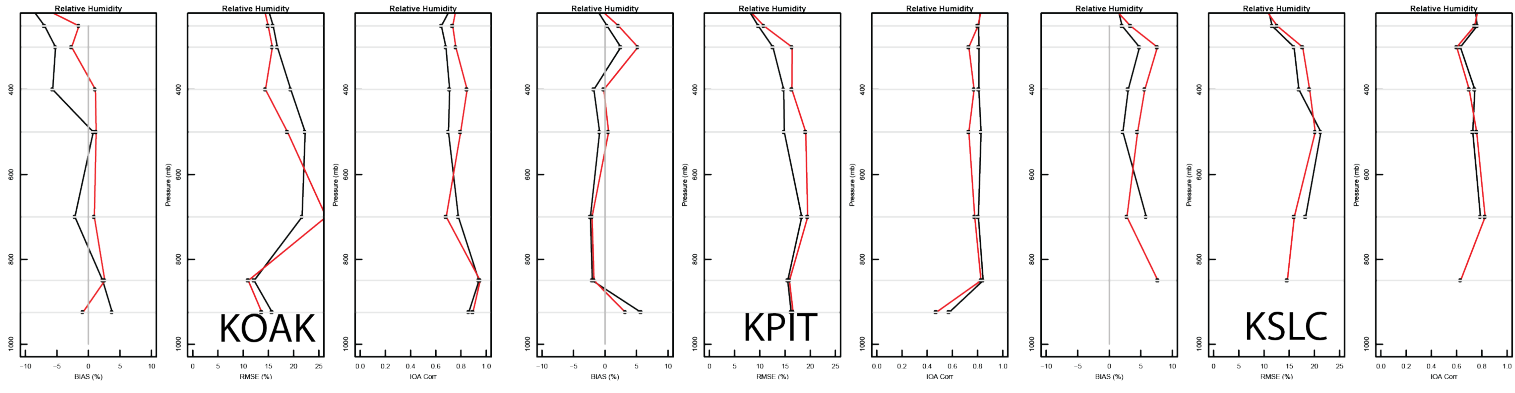

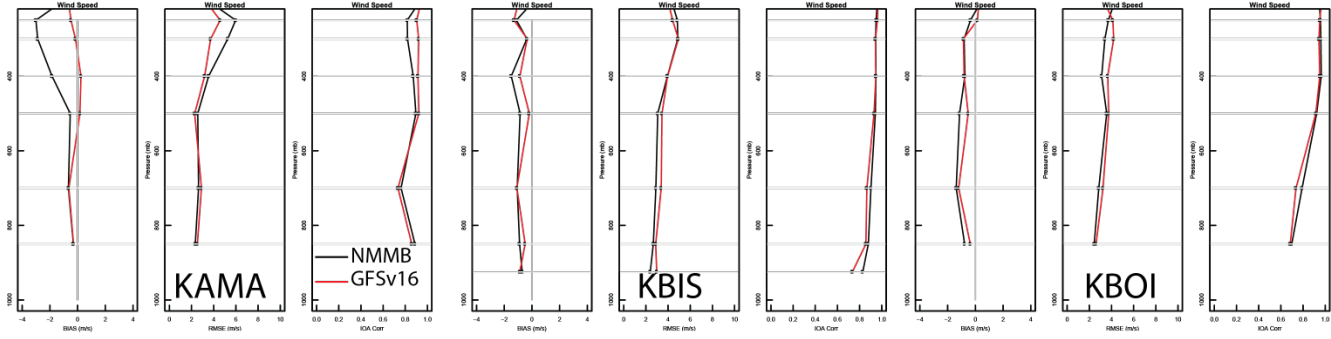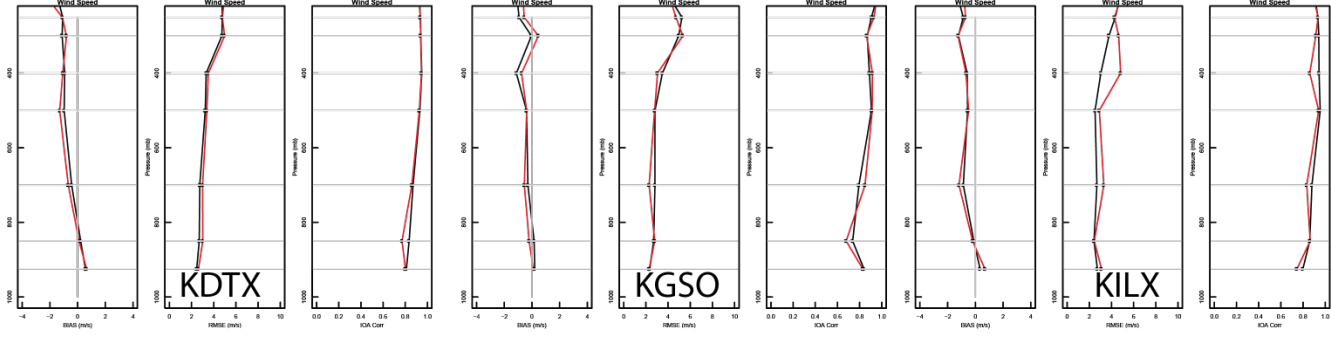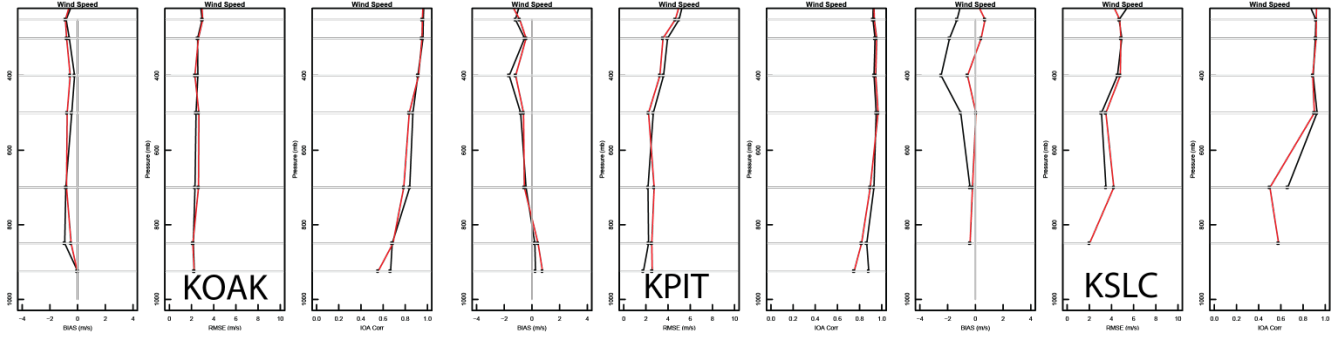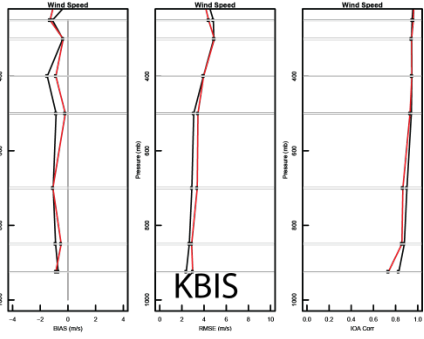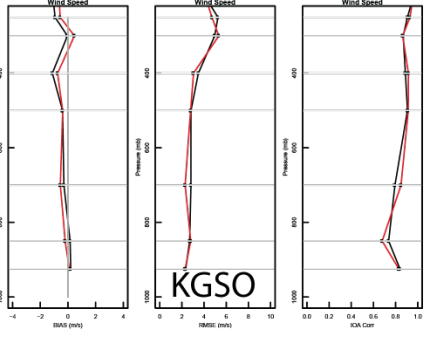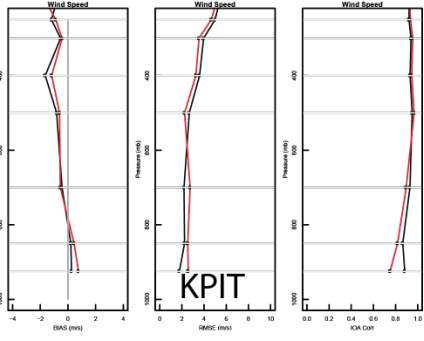



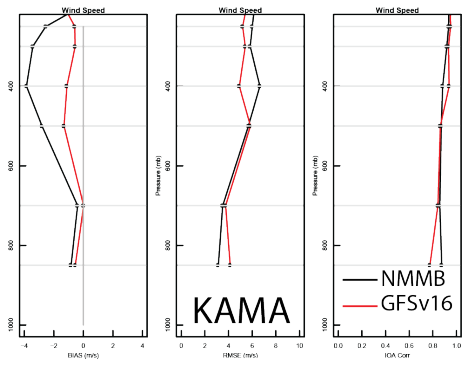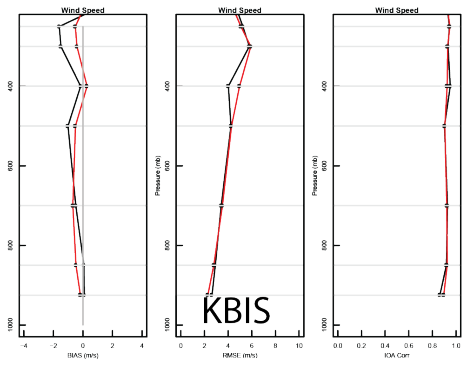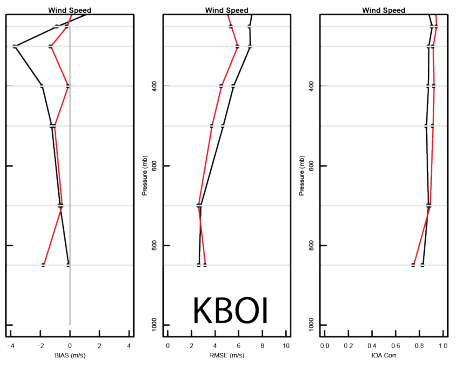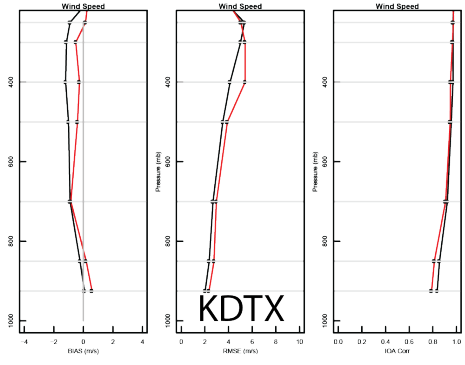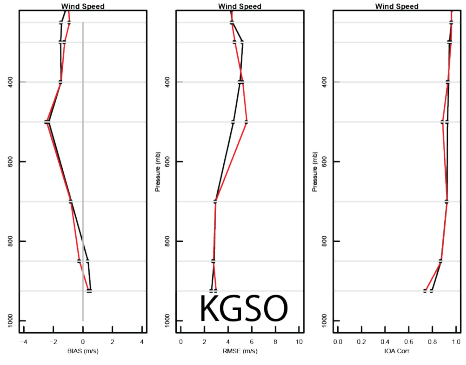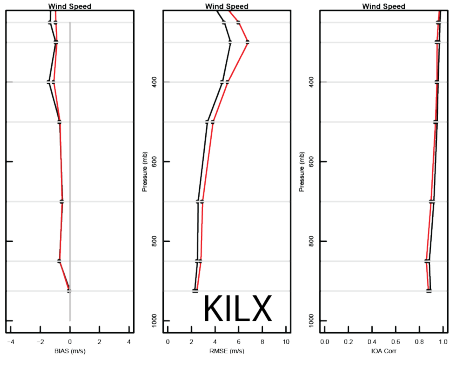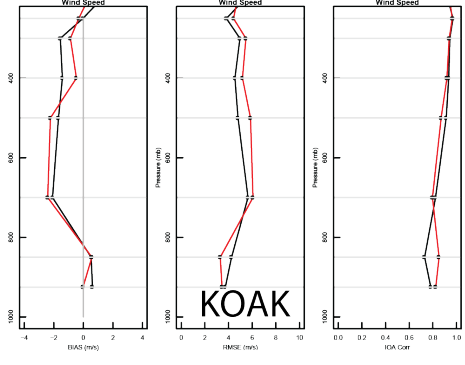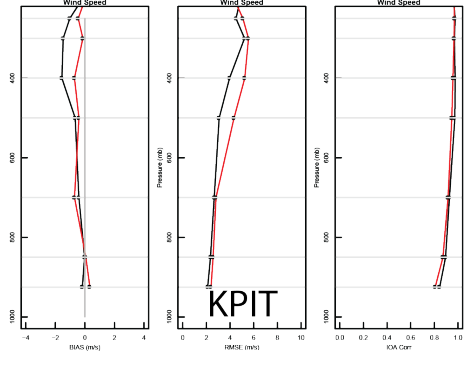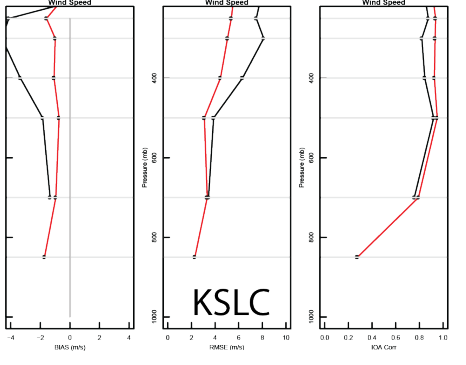

# September MB

NMMB

GFSv16

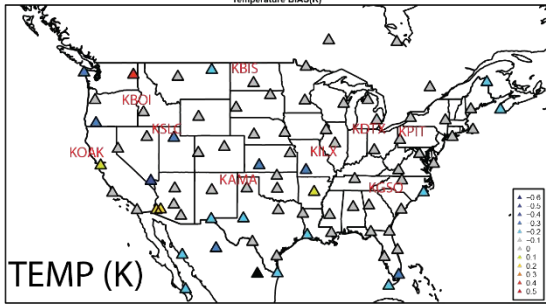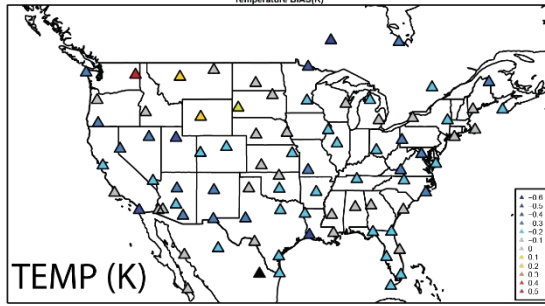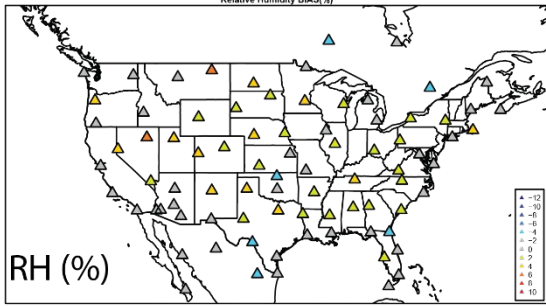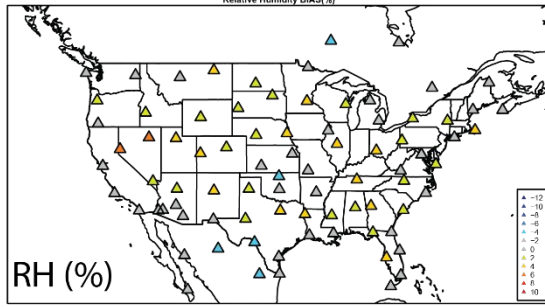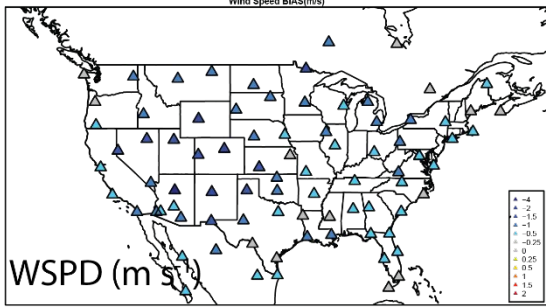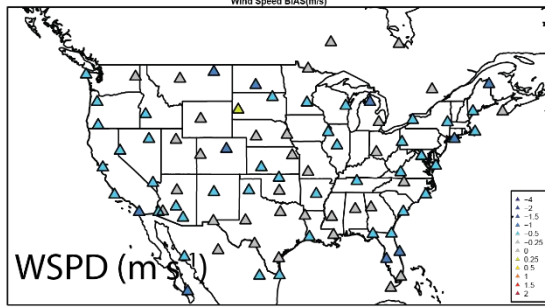

# January MB

NMMB  
Temperature BIAS(K)

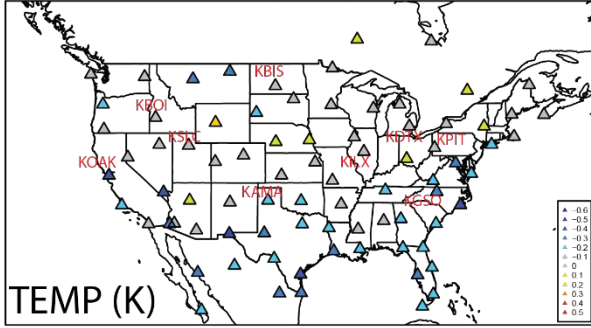

GFSv16  
Temperature BIAS(K)

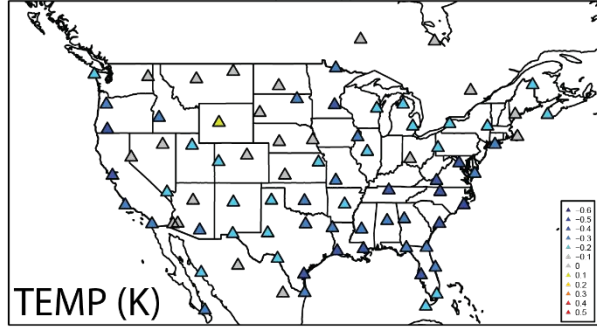

Relative Humidity BIAS(%)

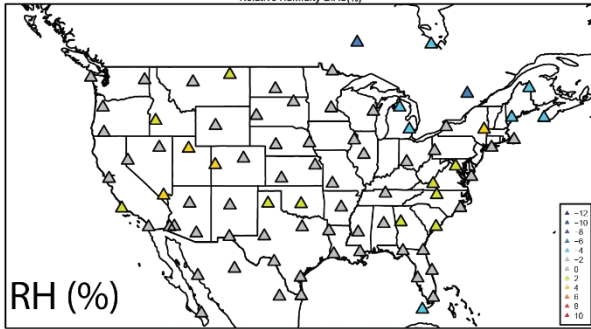

Relative Humidity BIAS(%)

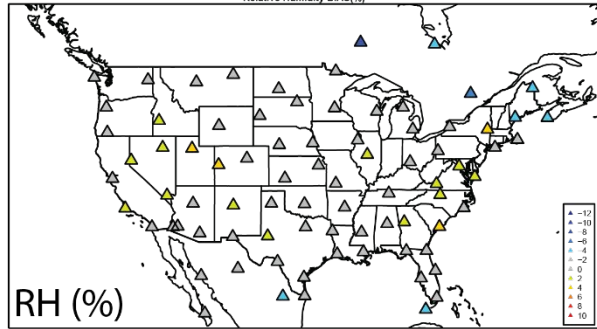

Wind Speed BIAS(m/s)

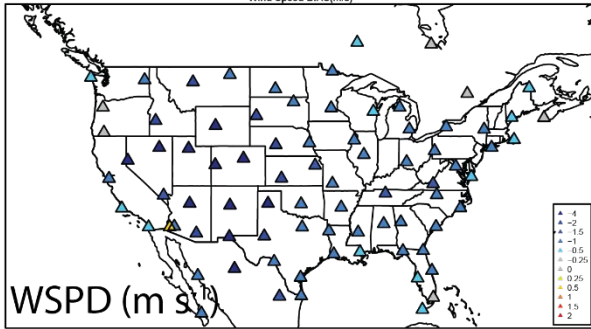

Wind Speed BIAS(m/s)

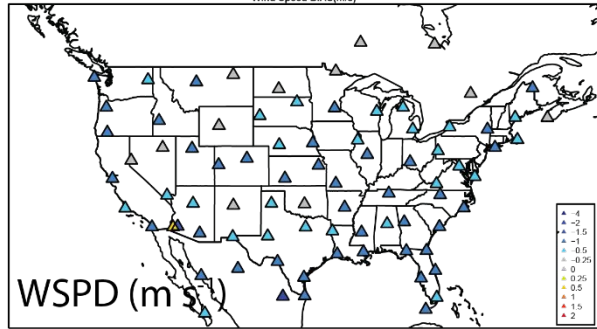

# September RMSE

**NMMB**  
Temperature RMSE(K)

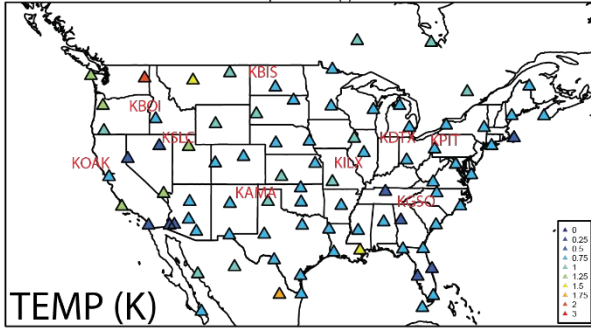

**GFSv16**  
Temperature RMSE(K)

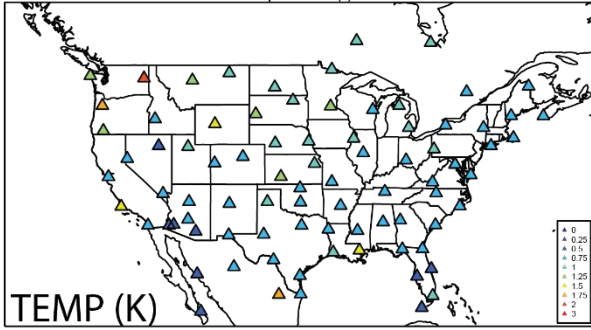

Relative Humidity RMSE(%)

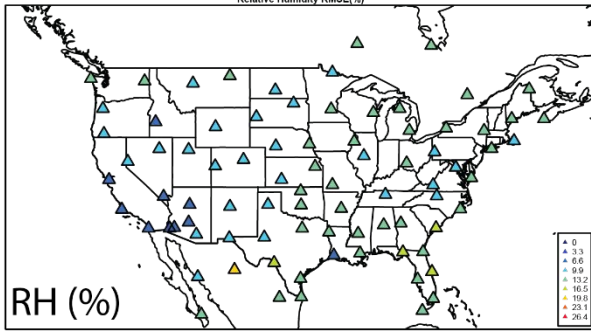

Relative Humidity RMSE(%)

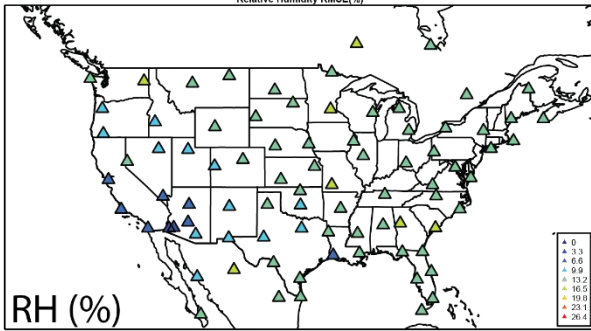

Wind Speed RMSE(m/s)

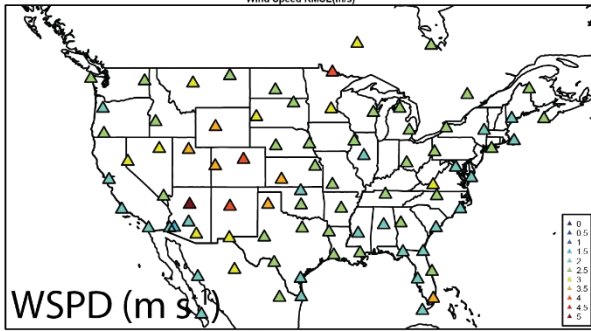

Wind Speed RMSE(m/s)

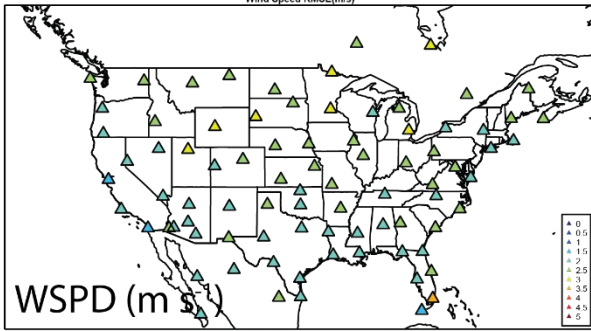

# January RMSE

NMMB  
Temperature RMSE(K)

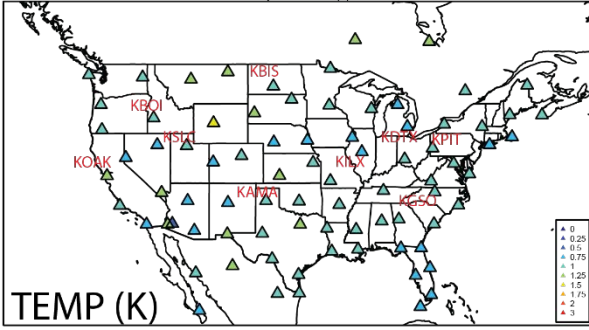

GFSv16  
Temperature RMSE(K)

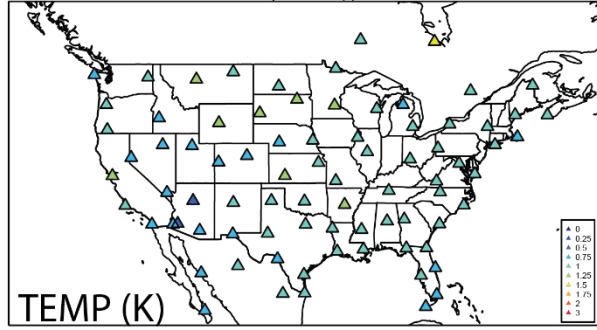

Relative Humidity RMSE(%)

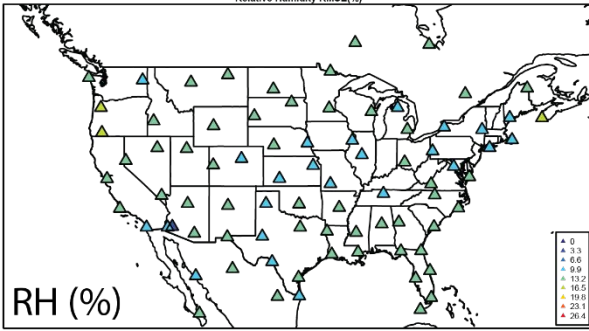

Relative Humidity RMSE(%)

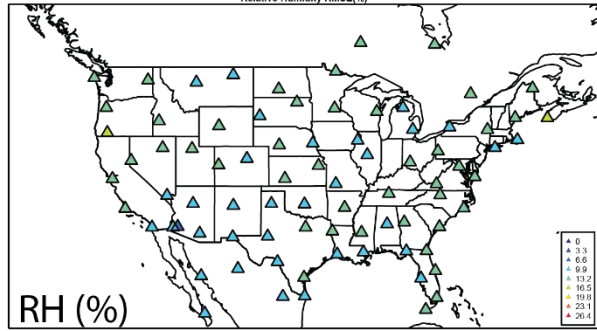

Wind Speed RMSE(m/s)

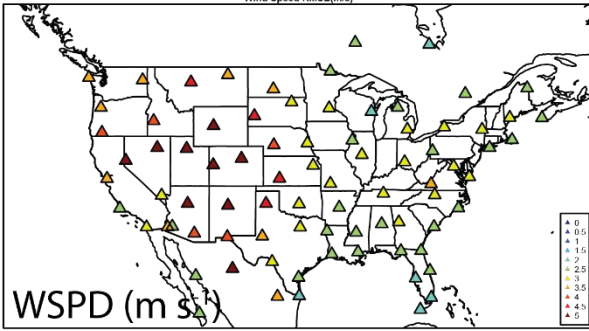

Wind Speed RMSE(m/s)

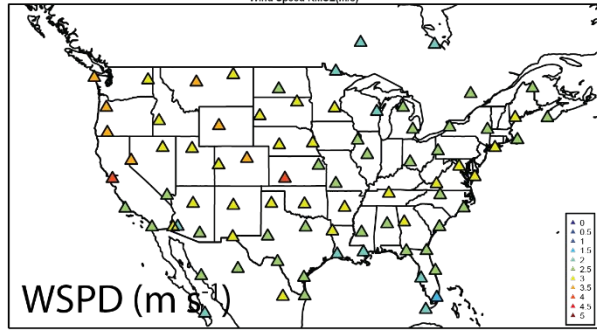

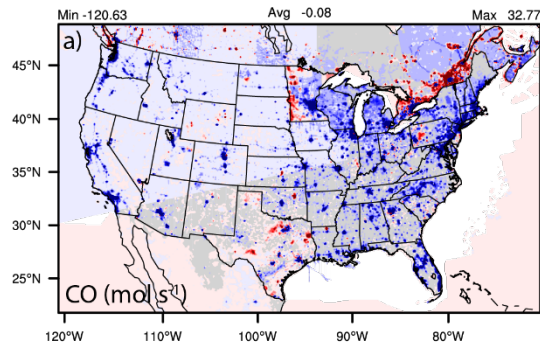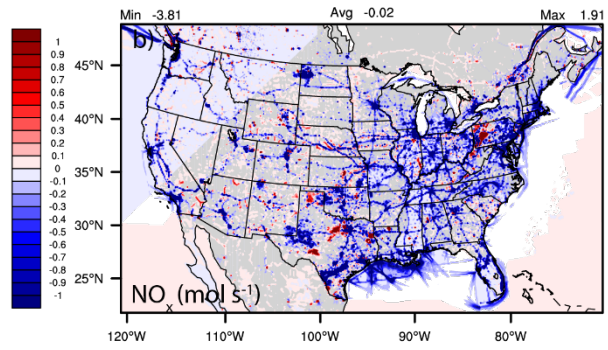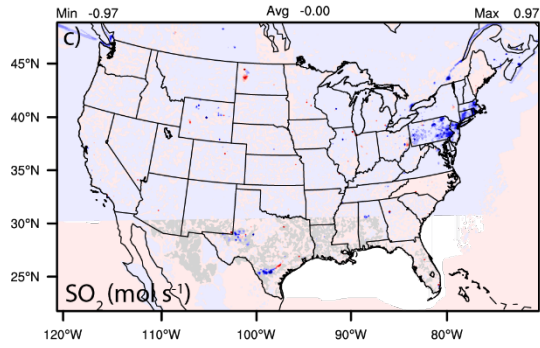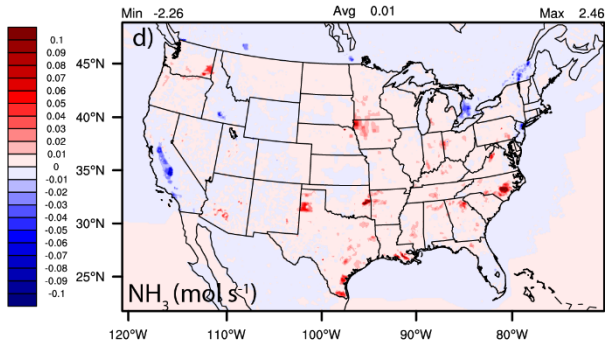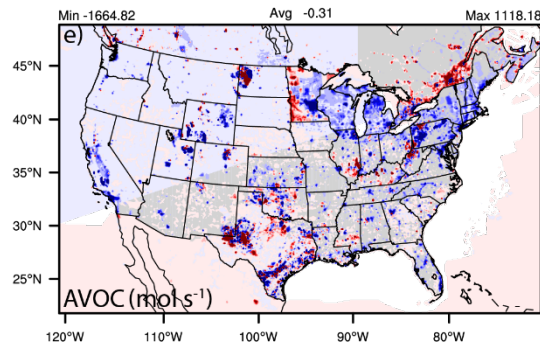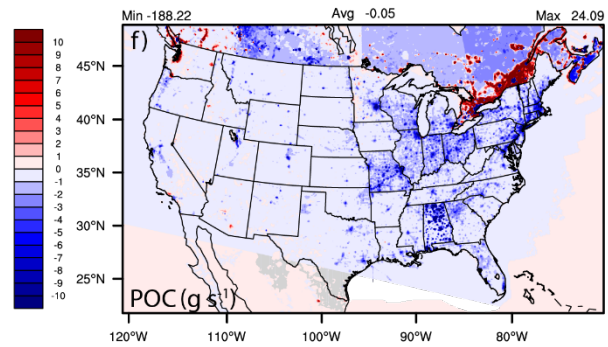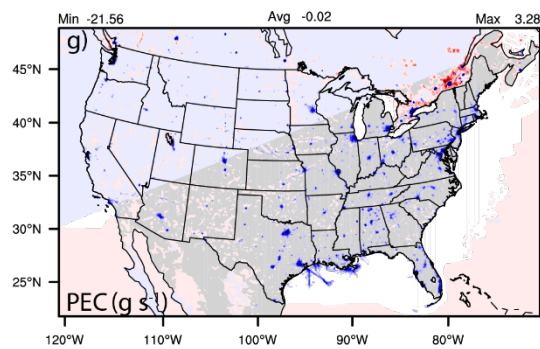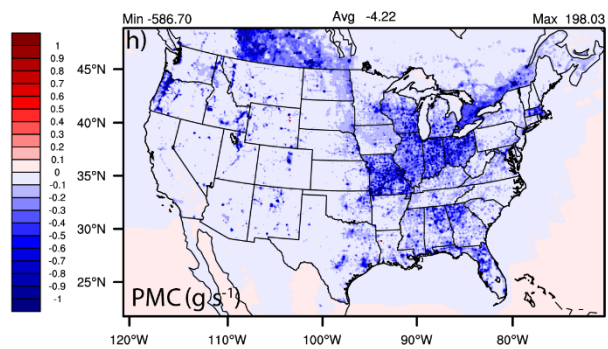

## Early Afternoon

## Late Afternoon

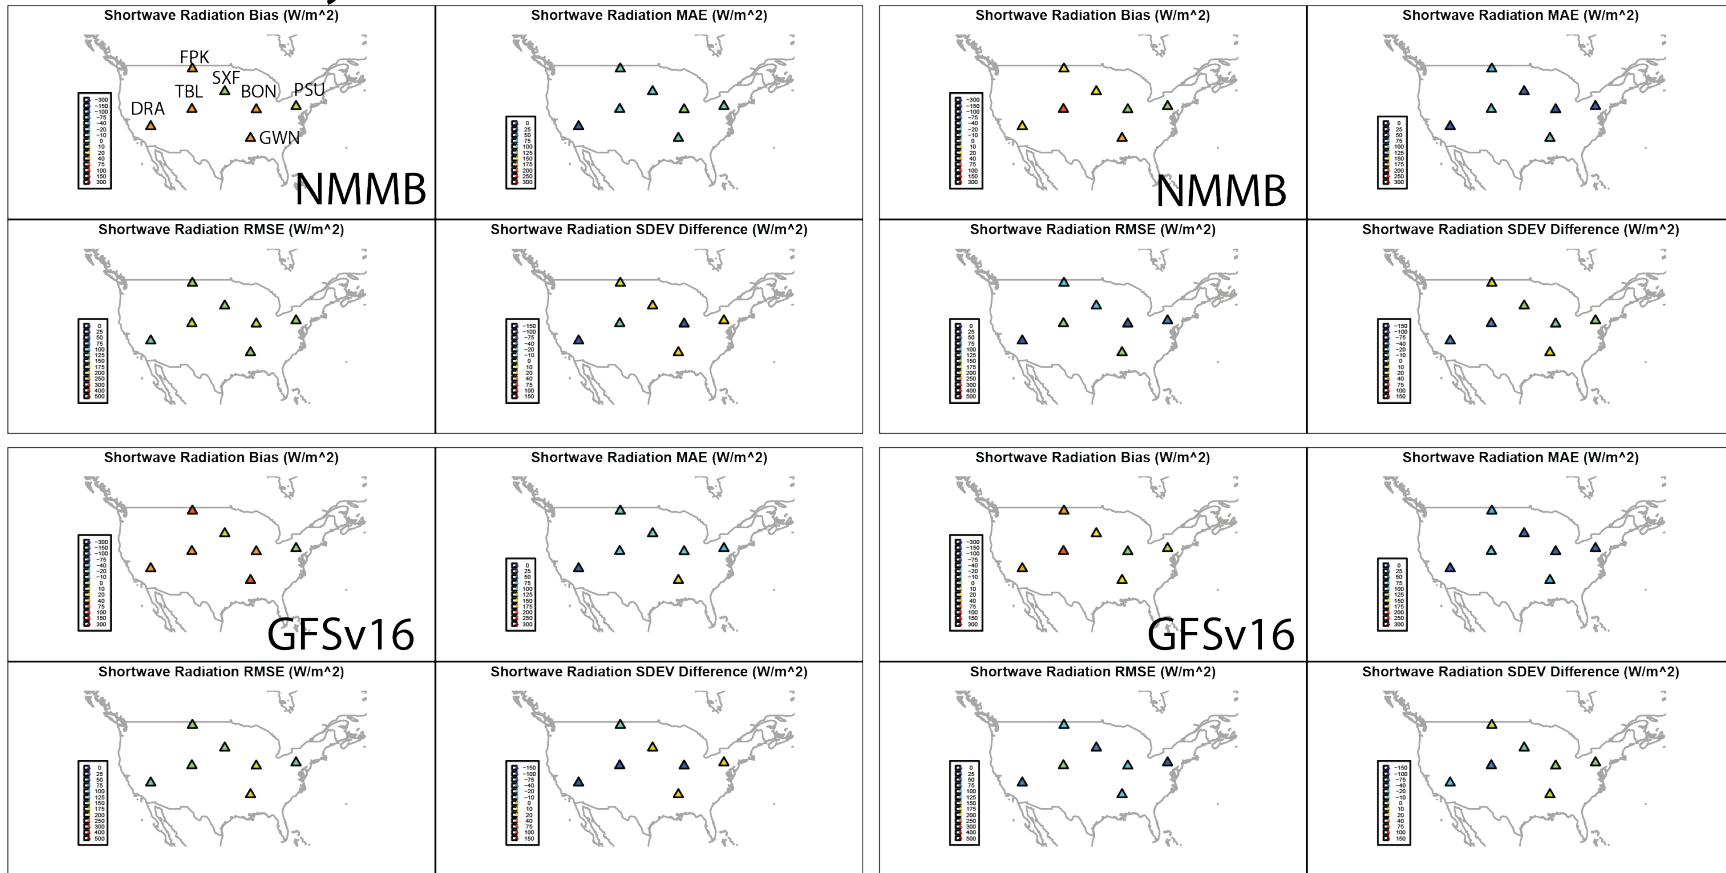

**Figure S21.** September 2020 spatial mean shortwave radiation bias, mean absolute error (MAE), root mean square error (RMSE), and standard deviation (SDEV) for early afternoon (left) and late afternoon (right) hours for NMMB (top) and GFSv16 (bottom) against the available eight BSRN-SURFRAD sites in CONUS. The SURFRAD site locations are labeled in the top left panel.

## SURFRAD: Table Mountain (TBL) Site

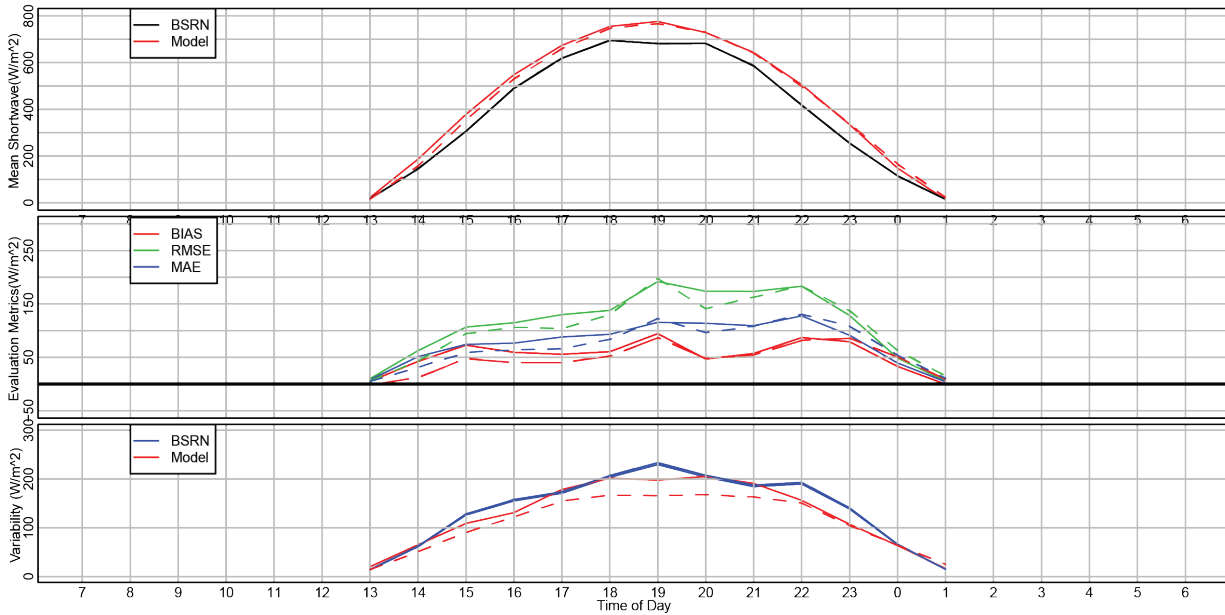

## SURFRAD: Bondville (BON) Site

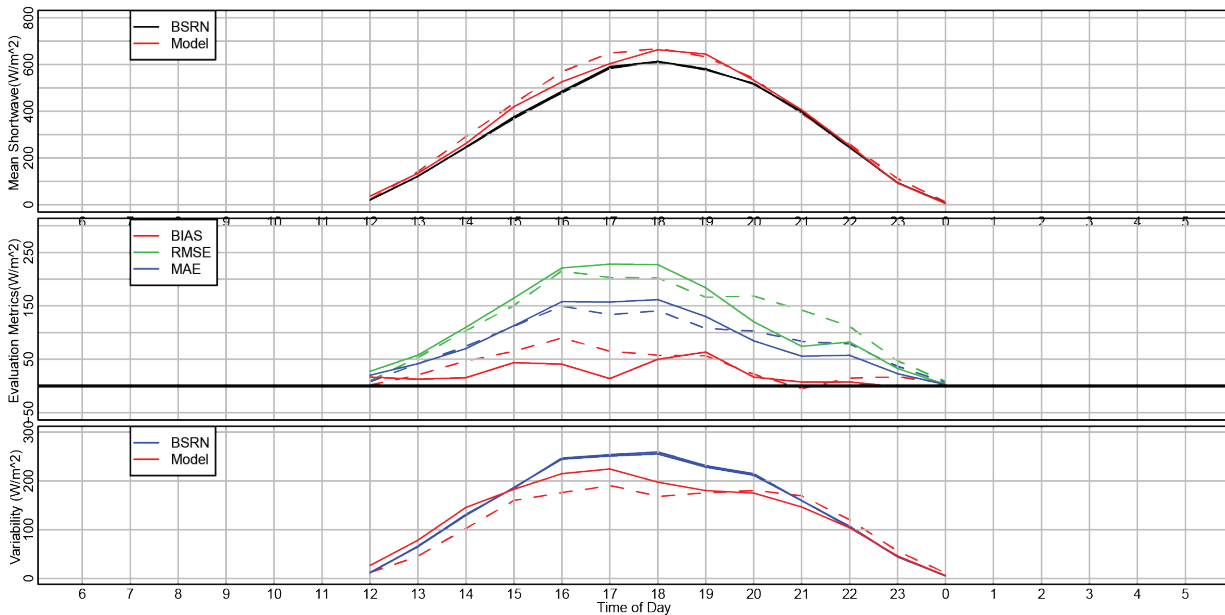

**Figure S22.** September 2020 diurnal mean shortwave radiation (top), evaluation metrics (middle), and variability (bottom) for the NMMB (solid) and GFSv16 (dashed) compared to the SURFRAD TBL and BON sites. Site locations are shown in Figure S21.



## September 2020 Gases

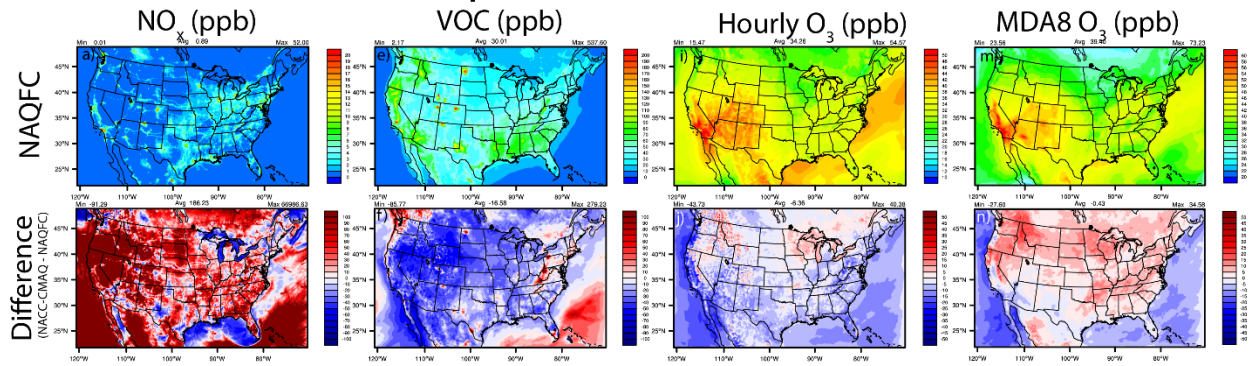

## January 2021 Aerosols

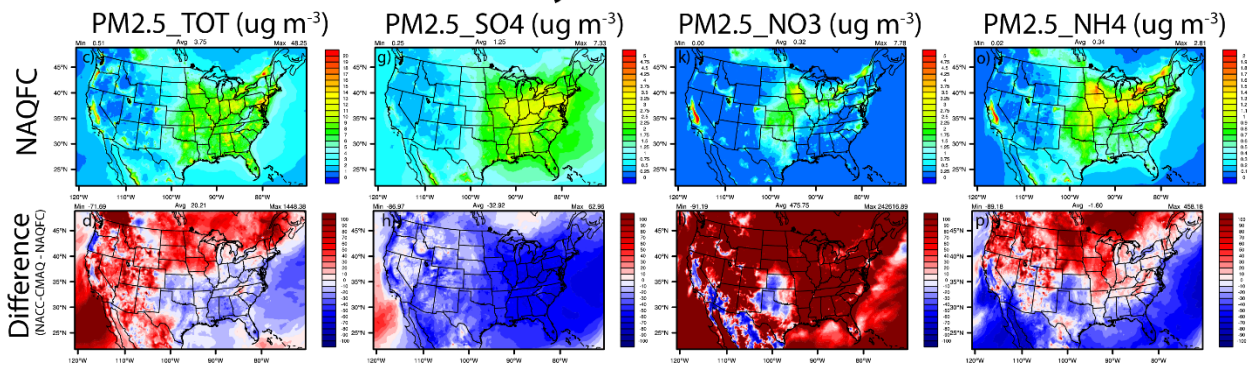

**Figure S23.** Average September 2020 NO<sub>x</sub>, total VOC, hourly O<sub>3</sub>, and MDA8 O<sub>3</sub> and January 2021 PM2.5\_TOT, PM2.5\_SO4, PM2.5\_NO3, and PM2.5\_NH4 spatial plots for the operational NAQFC, and the relative (%) differences for NACC-CMAQ - NAQFC.

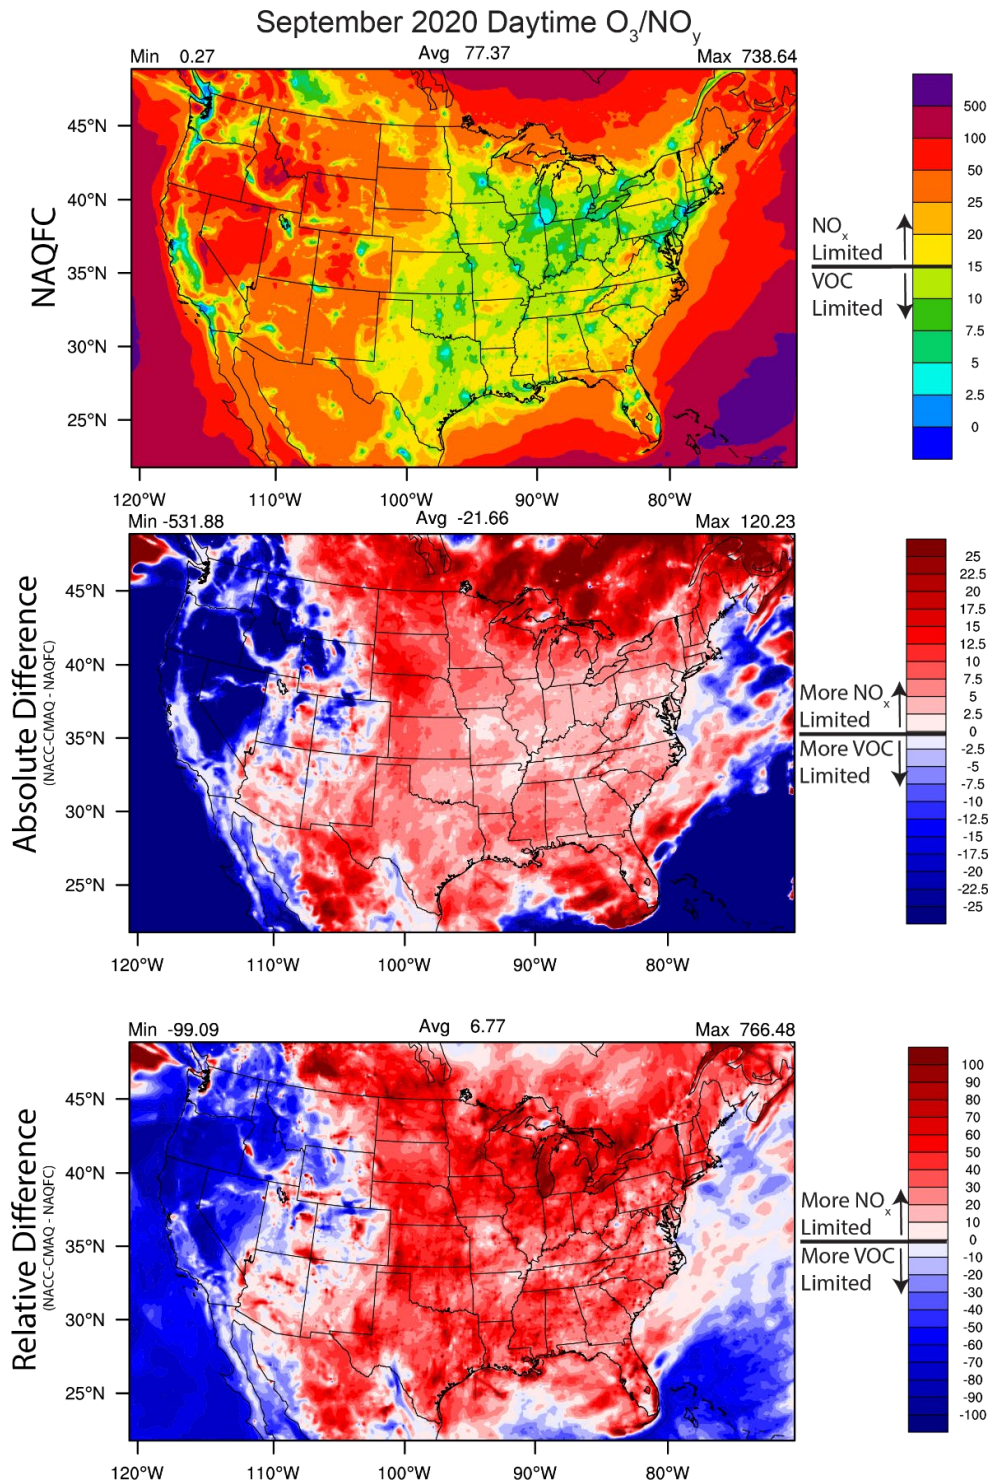

**Figure S24.** NAQFC simulated daytime (estimated using 17 – 23 UTC hours only) average  $O_3/NO_y$  indicator ratio for September 2020, and the absolute and relative (5) change for NACC-CMAQ – NAQFC.

# January 2021 Aerosols

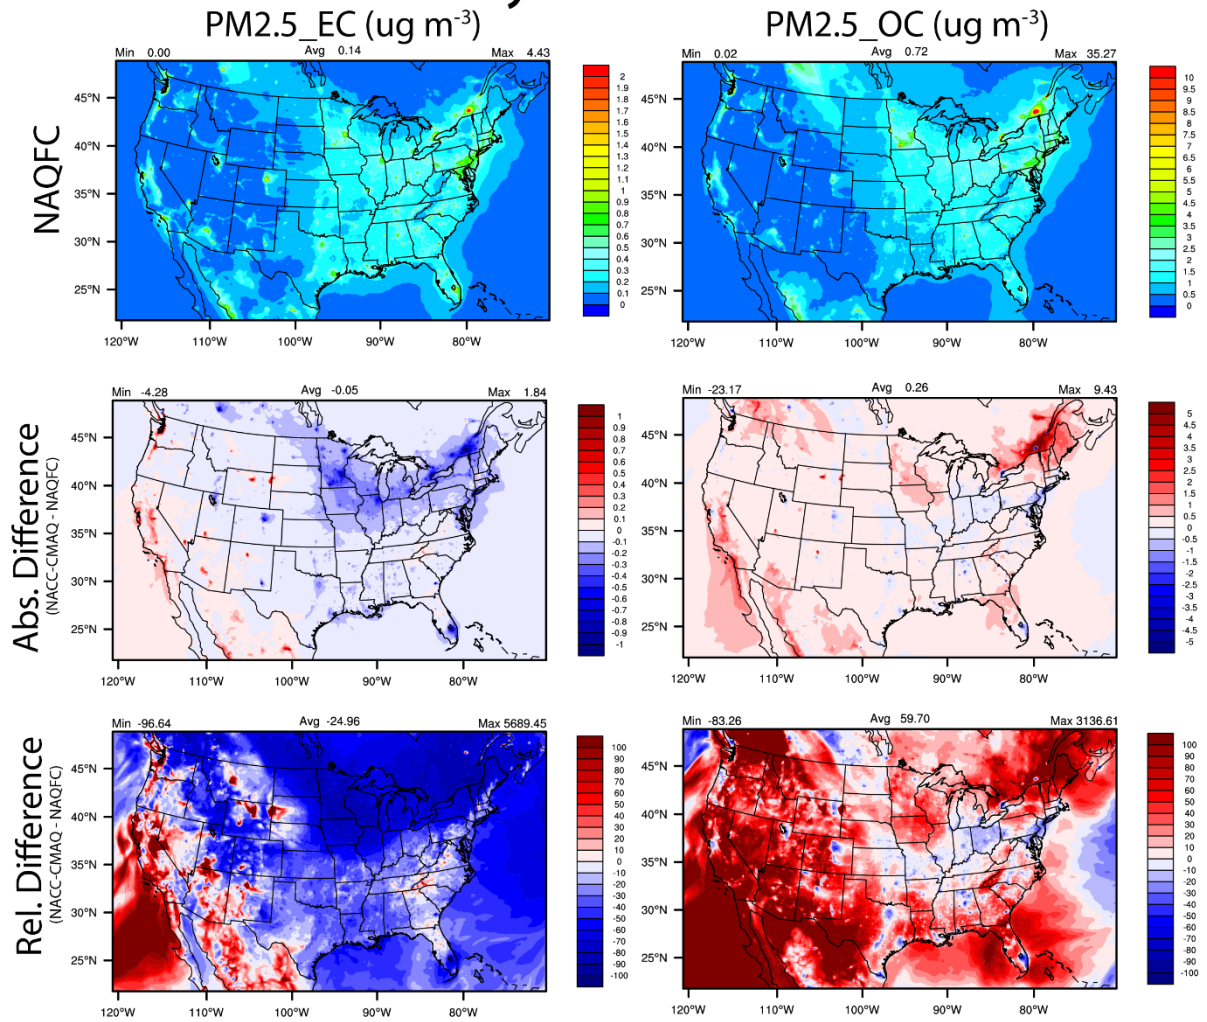

**Figure S25.** Average January 2021 PM2.5\_EC and PM2.5\_OC spatial plots for operational NAQFC and the absolute and relative (%) differences for NACC-CMAQ-NAQFC.

### Day 1 Mean Bias (Model-AirNow) Plots and Domain-Wide Statistics

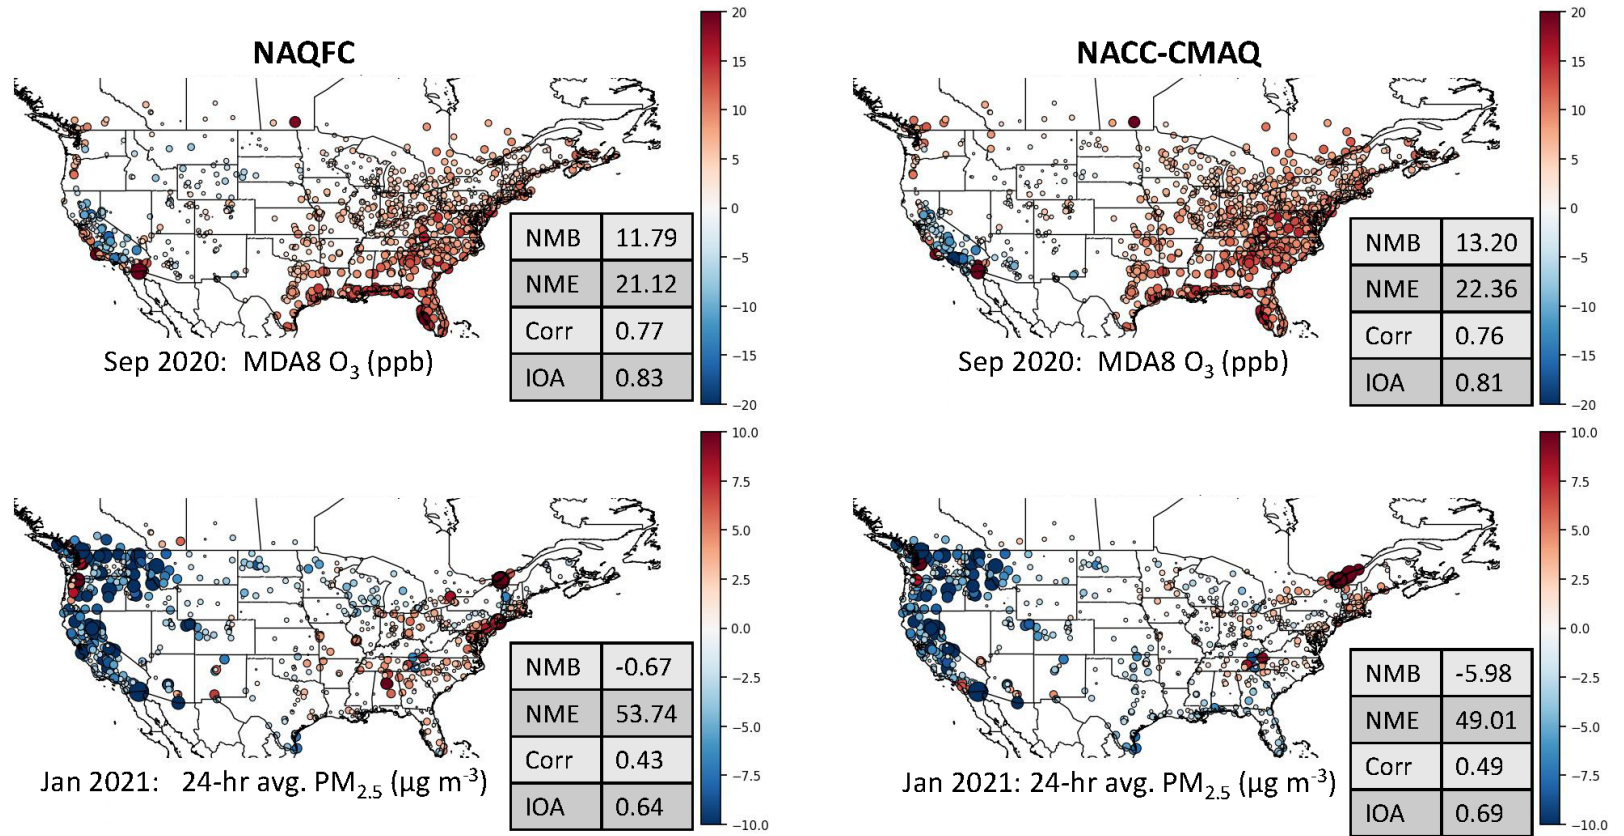

**Figure S26.** Day 1 forecast mean bias plots (model-AirNow) for the current operational NAQFC (left) and NACC-CMAQ (right) MDA8 O<sub>3</sub> (top) and 24-hr average PM<sub>2.5</sub> (bottom) in a-b) September 2020 and c-d) January 2021. Average domain-wide statistics are shown in the tables on the bottom left of each panel.

### Day 2 Mean Bias (Model-AirNow) Plots and Domain-Wide Statistics

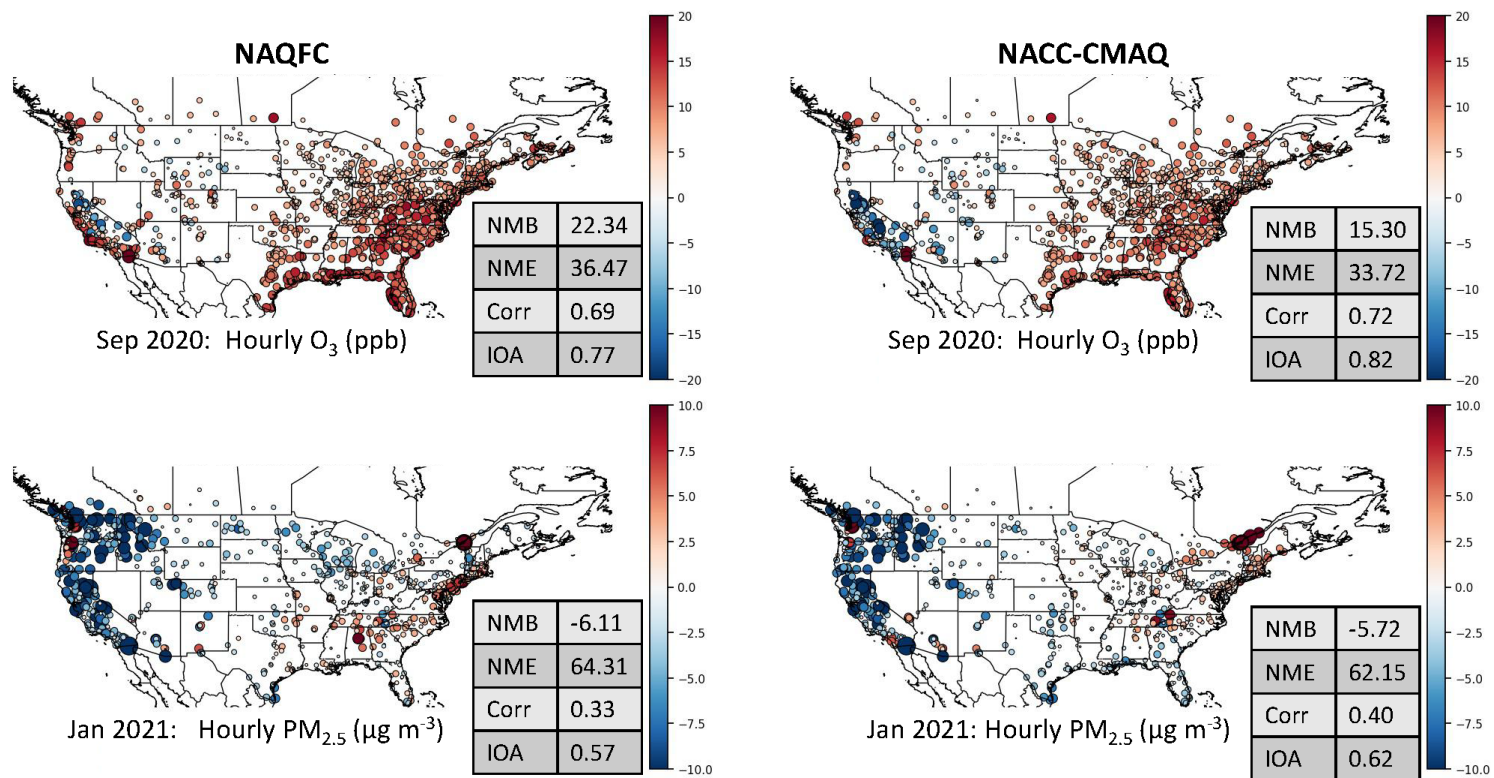

**Figure S27.** Same as in Figure S26, but for Day 2 forecasted hourly O<sub>3</sub> and PM<sub>2.5</sub>

### Day 2 Mean Bias (Model-AirNow) Plots and Domain-Wide Statistics

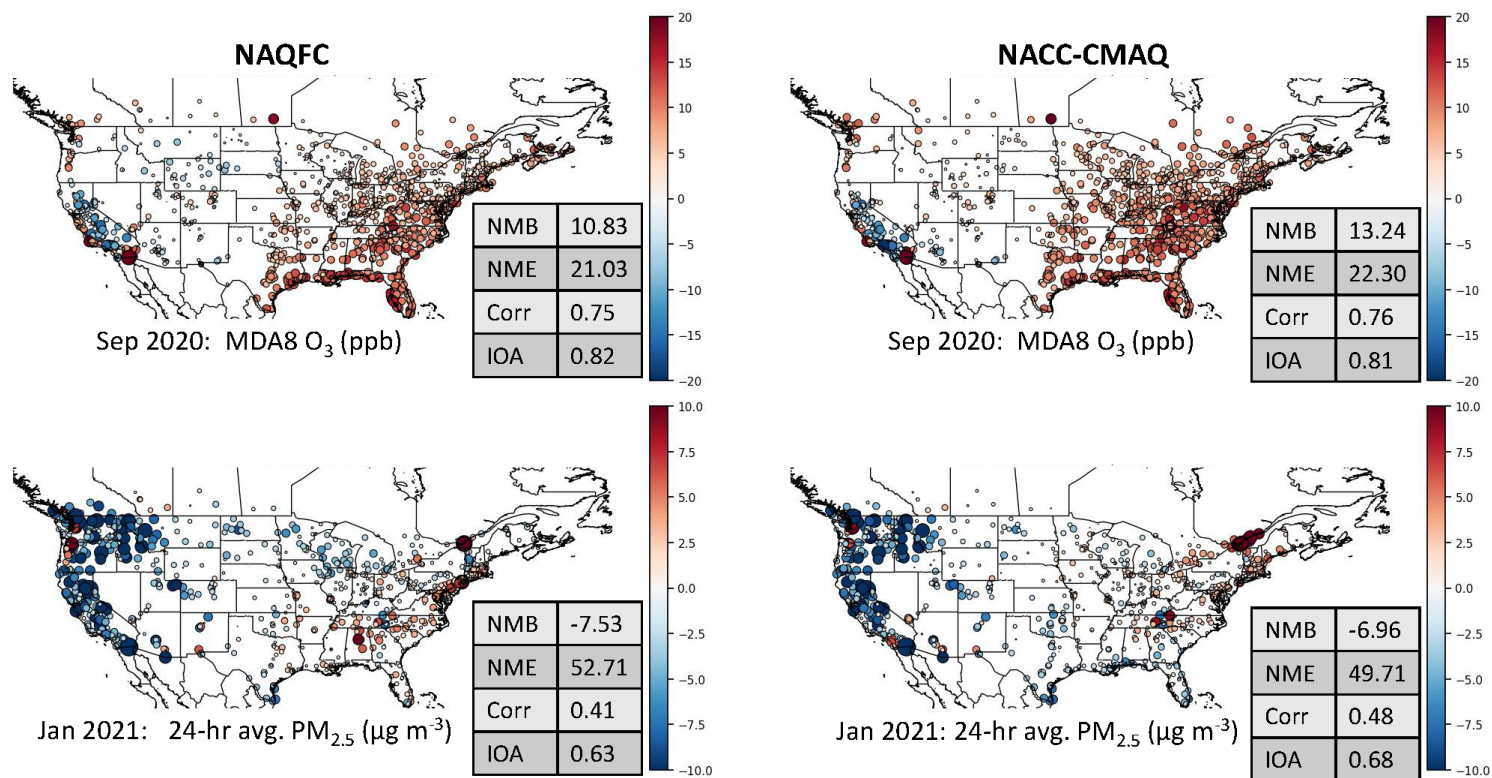

**Figure S28.** Same as in Figure S27, but for MDA8 O<sub>3</sub> and 24-hr average PM<sub>2.5</sub>.

### Day 3 Mean Bias (Model-AirNow) Plots and Domain-Wide Statistics

NAQFC

n.a.

NACC-CMAQ

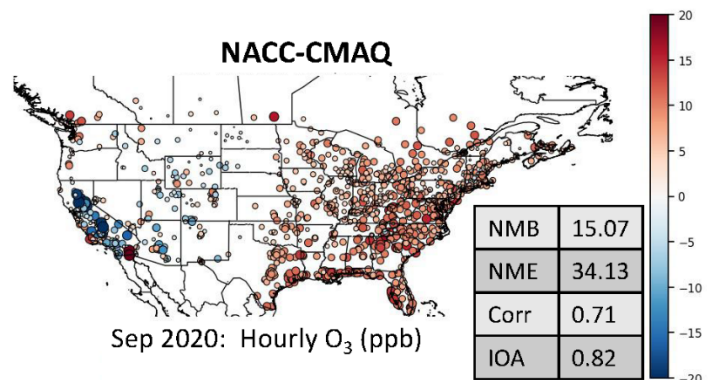

Sep 2020: Hourly O<sub>3</sub> (ppb)

n.a.

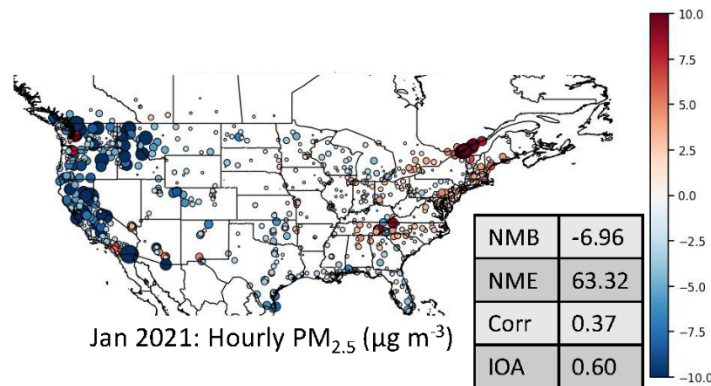

Jan 2021: Hourly PM<sub>2.5</sub> (µg m<sup>-3</sup>)

**Figure S29.** Same as in Figure S27, but for Day 3 forecasts (NACC-CMAQ only).

### Day 3 Mean Bias (Model-AirNow) Plots and Domain-Wide Statistics

NAQFC

n.a.

NACC-CMAQ

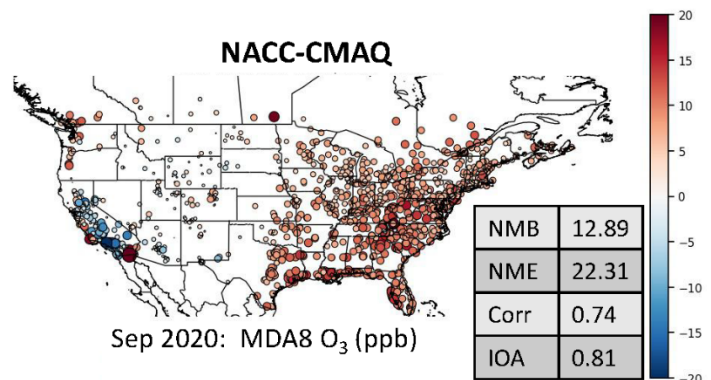

n.a.

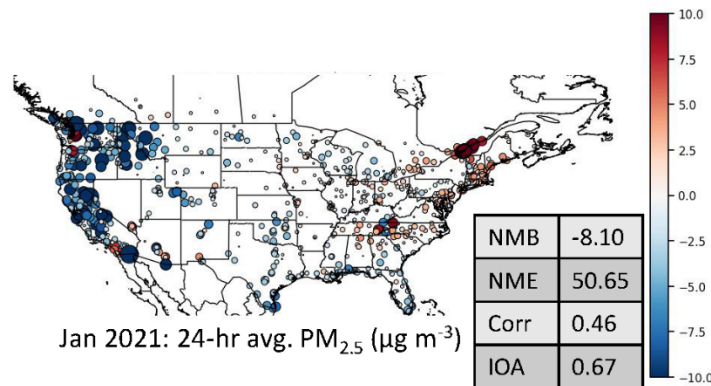

**Figure S30.** Same as in Figure S29, but for MDA8 O<sub>3</sub> and 24-hr average PM<sub>2.5</sub>.



**Table S1a.** December 2020 average statistical performance of hourly ozone for the base simulation without vegetation frost switch (BASE), with frost switch and BELD3 (FROST3), and with frost switch and BELD5 (FROST5). The regions are defined by the U.S. EPA geographic regions (<https://www.epa.gov/aboutepa/regional-and-geographic-offices>).

| Regions                          | R1    | R2    | R3    | R4    | R5    | R6   | R7    | R8    | R9   | R10  |
|----------------------------------|-------|-------|-------|-------|-------|------|-------|-------|------|------|
| <b>Normalized Mean Bias (%)</b>  |       |       |       |       |       |      |       |       |      |      |
| <b>BASE</b>                      | +11.3 | +14.2 | +11.5 | +14.6 | +23.5 | +4.3 | +16.3 | +11.1 | +5.1 | -6.6 |
| <b>FROST3</b>                    | +10.7 | +13.4 | +10.5 | +14.3 | +22.2 | +3.8 | +14.9 | +9.9  | +5.0 | -6.8 |
| <b>FROST5</b>                    | +9.8  | +11.8 | +8.4  | +13.2 | +19.3 | +1.6 | +12.2 | +8.0  | +2.3 | -7.5 |
| <b>Normalized Mean Error (%)</b> |       |       |       |       |       |      |       |       |      |      |
| <b>BASE</b>                      | 25.6  | 27.5  | 26.9  | 28.9  | 32.8  | 28.8 | 34.9  | 29.2  | 37.1 | 31.3 |
| <b>FROST3</b>                    | 25.4  | 27.1  | 26.5  | 28.8  | 31.9  | 28.6 | 34.0  | 28.8  | 37.1 | 31.3 |
| <b>FROST5</b>                    | 25.1  | 26.7  | 26.3  | 28.4  | 31.0  | 28.7 | 33.9  | 28.2  | 36.8 | 31.3 |
| <b>Correlation</b>               |       |       |       |       |       |      |       |       |      |      |
| <b>BASE</b>                      | 0.65  | 0.70  | 0.64  | 0.69  | 0.66  | 0.71 | 0.64  | 0.56  | 0.64 | 0.73 |
| <b>FROST3</b>                    | 0.66  | 0.71  | 0.64  | 0.69  | 0.66  | 0.71 | 0.65  | 0.57  | 0.64 | 0.73 |
| <b>FROST5</b>                    | 0.66  | 0.71  | 0.64  | 0.69  | 0.65  | 0.70 | 0.63  | 0.57  | 0.64 | 0.73 |
| <b>Index of Agreement</b>        |       |       |       |       |       |      |       |       |      |      |
| <b>BASE</b>                      | 0.78  | 0.81  | 0.78  | 0.79  | 0.75  | 0.83 | 0.77  | 0.74  | 0.80 | 0.85 |
| <b>FROST3</b>                    | 0.78  | 0.82  | 0.78  | 0.79  | 0.76  | 0.83 | 0.78  | 0.74  | 0.80 | 0.85 |
| <b>FROST5</b>                    | 0.79  | 0.82  | 0.79  | 0.79  | 0.76  | 0.83 | 0.78  | 0.75  | 0.80 | 0.85 |

**Table S1b.** Same as in Table S1a, but for hourly PM<sub>2.5</sub>.

| Regions                          | R1    | R2    | R3    | R4   | R5    | R6   | R7    | R8    | R9    | R10   |
|----------------------------------|-------|-------|-------|------|-------|------|-------|-------|-------|-------|
| <b>Normalized Mean Bias (%)</b>  |       |       |       |      |       |      |       |       |       |       |
| <b>BASE</b>                      | +30.0 | +55.3 | +28.9 | +7.9 | +21.1 | -1.1 | +28.5 | -17.4 | -14.9 | -6.2  |
| <b>FROST3</b>                    | +27.4 | +53.3 | +26.9 | +7.0 | +19.1 | -1.9 | +26.7 | -19.1 | -15.3 | -7.0  |
| <b>FROST5</b>                    | +24.4 | +50.2 | +23.1 | +0.8 | +15.6 | -9.0 | +21.6 | -27.4 | -24.3 | -14.1 |
| <b>Normalized Mean Error (%)</b> |       |       |       |      |       |      |       |       |       |       |
| <b>BASE</b>                      | 67.9  | 88.3  | 60.7  | 50.9 | 53.1  | 61.2 | 59.5  | 66.1  | 63.7  | 81.5  |
| <b>FROST3</b>                    | 66.6  | 86.9  | 59.3  | 50.5 | 52.1  | 60.8 | 58.5  | 65.7  | 63.6  | 81.1  |
| <b>FROST5</b>                    | 65.1  | 85.0  | 57.7  | 48.2 | 50.6  | 58.6 | 56.4  | 64.6  | 61.7  | 79.9  |
| <b>Correlation</b>               |       |       |       |      |       |      |       |       |       |       |
| <b>BASE</b>                      | 0.61  | 0.53  | 0.63  | 0.49 | 0.62  | 0.32 | 0.57  | 0.34  | 0.39  | 0.30  |
| <b>FROST3</b>                    | 0.61  | 0.53  | 0.63  | 0.49 | 0.63  | 0.32 | 0.57  | 0.34  | 0.39  | 0.30  |
| <b>FROST5</b>                    | 0.61  | 0.52  | 0.62  | 0.49 | 0.62  | 0.32 | 0.56  | 0.34  | 0.40  | 0.28  |
| <b>Index of Agreement</b>        |       |       |       |      |       |      |       |       |       |       |
| <b>BASE</b>                      | 0.72  | 0.54  | 0.72  | 0.68 | 0.75  | 0.56 | 0.71  | 0.57  | 0.61  | 0.54  |
| <b>FROST3</b>                    | 0.73  | 0.55  | 0.72  | 0.68 | 0.76  | 0.56 | 0.71  | 0.57  | 0.61  | 0.54  |
| <b>FROST5</b>                    | 0.73  | 0.55  | 0.72  | 0.68 | 0.76  | 0.55 | 0.71  | 0.56  | 0.60  | 0.53  |

**Table S2.** Operational NAQFC (NMMB-CMAQv5.0.2) model components and configurations (Adapted from Lee et al., 2017). References are found in the main text.

| Model Attribute                          | Configuration                                                                                       | Reference                                                                                                                                                      |
|------------------------------------------|-----------------------------------------------------------------------------------------------------|----------------------------------------------------------------------------------------------------------------------------------------------------------------|
| Domain                                   | Contiguous U.S.;<br>Center = 33°N;97°W                                                              | n/a                                                                                                                                                            |
| Horizontal Resolution                    | 12 km                                                                                               | n/a                                                                                                                                                            |
| Vertical Resolution                      | 35 Layers from near-surface to<br>about 14 km (~ 60 hPa)                                            | n/a                                                                                                                                                            |
| Meteorological ICs and BCs               | NMMB                                                                                                | <i>Black, 1994; Janjic and Gall, 2012</i>                                                                                                                      |
| Chemical ICs and BCs                     | 2006 GEOS-Chem Simulation<br>&<br>NGAC Dust Ony CLBCs                                               | <a href="http://acmg.seas.harvard.edu/geos/">http://acmg.seas.harvard.edu/geos/</a><br>Tang et al. (2021)                                                      |
| Anthropogenic Emissions                  | NEI2014v2                                                                                           | <i>EPA (2014)</i>                                                                                                                                              |
| Biogenic Emissions                       | Inline BEISv3.1.4 & BELD3                                                                           | <i>Vukovich and Pierce (2002); Schwede et al. (2005)</i>                                                                                                       |
| Wildfire Emissions/Plume Rise            | NOAA/NESDIS Hazard Mapping<br>System-Bluesky Methodology/<br><br>Inline Briggs                      | <i>Ruminski et al., 2008; Schroeder et al., 2008;<br/>Ruminski and Kondragunta, 2006; O'Neill et al.<br/>(2009); Pan et al. (2020)</i><br><i>Briggs (1965)</i> |
| Microphysics                             | Ferrier-Aligo                                                                                       | <i>Aligo et al. (2014)</i>                                                                                                                                     |
| PBL Physics Scheme                       | Mellor-Yamada-Janjic (MYJ)<br>ACM2 (CMAQ recalculated)                                              | <i>Janjic et al. (2001)</i><br><i>Pleim (2007a;2007b)</i>                                                                                                      |
| Shallow/Deep Cumulus<br>Parameterization | Betts-Miller-Janjic                                                                                 | <i>Janjic (2000)</i>                                                                                                                                           |
| Shortwave and Longwave<br>Radiation      | RRTMg                                                                                               | <i>Mlawer et al. (1997); Clough et al. (2005);<br/>Iacono et al. (2008)</i>                                                                                    |
| Land Surface Model                       | Noah Land Surface Model                                                                             | <i>Chen and Dudhia (2001), Ek et al. (2003), Tewari et<br/>al. (2004)</i>                                                                                      |
| Surface Layer                            | Monin-Obukhov                                                                                       | <i>Monin-Obukhov (1954); Grell et al. (1994);<br/>Jimenez et al. (2012)</i>                                                                                    |
| Gas-phase Chemistry                      | CB05                                                                                                | <i>Yarwood et al., 2005</i>                                                                                                                                    |
| Aqueous-phase Chemistry                  | CMAQ AQChem Updates                                                                                 | <i>Martin and Good (1991); Alexander et al. (2009);<br/>Sarwar et al. (2011)</i>                                                                               |
| Aerosol Module/Size                      | AERO4                                                                                               | <i>Binkowski and Roselle (2003)</i>                                                                                                                            |
| Other Model Attributes                   | -In-line Photolysis<br>-Offline FENGSHA Wind-Blown<br>Dust Emissions<br>-In-line Sea-salt Emissions | <i>Binkowski et al. (2007)</i><br>Fu et al., 2014; Huang et al., 2015; Dong et al.,<br>2016<br><i>Kelley et al. (2010)</i>                                     |

**Table S3.** September 2020 average statistical summary of TEMP2, Q2, and WSPD10 for NMMB and GFSv16 against the MADIS-METAR network for day 1, 2, and 3 (GFSv16) forecasts in the east (< 100° W) and west CONUS (> 100° W).

| TEMP2: September 2020-East U.S.  |           |          |             |      | TEMP2: September 2020-West U.S.  |           |          |             |      |
|----------------------------------|-----------|----------|-------------|------|----------------------------------|-----------|----------|-------------|------|
| Day 1                            | MB (K)    | *NMB (%) | RMSE (K)    | R    | Day 1                            | MB (K)    | *NMB (%) | RMSE (K)    | R    |
|                                  | NMMB      |          |             |      |                                  | NMMB      |          |             |      |
|                                  | 0.33      | 0.69     | 1.94        | 0.96 |                                  | 0.03      | 0.04     | 3.1         | 0.93 |
|                                  | GFSv16    |          |             |      |                                  | GFSv16    |          |             |      |
|                                  | 0.1       | 0.2      | 1.92        | 0.96 |                                  | 0.93      | 1.46     | 3.34        | 0.92 |
| Day 2                            | MB (K)    | *NMB (%) | RMSE (K)    | R    | Day 2                            | MB (K)    | *NMB (%) | RMSE (K)    | R    |
|                                  | NMMB      |          |             |      |                                  | NMMB      |          |             |      |
|                                  | 0.24      | 0.5      | 2.2         | 0.95 |                                  | 0.04      | 0.06     | 3.39        | 0.91 |
|                                  | GFSv16    |          |             |      |                                  | GFSv16    |          |             |      |
|                                  | 0.24      | 0.48     | 2.15        | 0.95 |                                  | 1.08      | 1.58     | 3.5         | 0.92 |
| Day 3                            | MB (K)    | NMB (%)  | RMSE (K)    | R    | Day 3                            | MB (K)    | NMB (%)  | RMSE (K)    | R    |
|                                  | NMMB      |          |             |      |                                  | NMMB      |          |             |      |
|                                  | n/a       | n/a      | n/a         | n/a  |                                  | n/a       | n/a      | n/a         | n/a  |
|                                  | GFSv16    |          |             |      |                                  | GFSv16    |          |             |      |
|                                  | 0.35      | 0.71     | 2.34        | 0.94 |                                  | 1.15      | 1.68     | 3.6         | 0.92 |
| Q2: September 2020-East U.S.     |           |          |             |      | Q2: September 2020-West U.S.     |           |          |             |      |
| Day 1                            | MB (g/kg) | *NMB (%) | RMSE (g/kg) | R    | Day 1                            | MB (g/kg) | *NMB (%) | RMSE (g/kg) | R    |
|                                  | NMMB      |          |             |      |                                  | NMMB      |          |             |      |
|                                  | -0.2      | -0.68    | 1.25        | 0.96 |                                  | -0.07     | -0.26    | 1.27        | 0.9  |
|                                  | GFSv16    |          |             |      |                                  | GFSv16    |          |             |      |
|                                  | -1.35     | -4.85    | 1.97        | 0.95 |                                  | -0.89     | -3.19    | 1.64        | 0.88 |
| Day 2                            | MB        | *NMB (%) | RMSE        | R    | Day 2                            | MB (g/kg) | *NMB (%) | RMSE (g/kg) | R    |
|                                  | NMMB      |          |             |      |                                  | NMMB      |          |             |      |
|                                  | -0.33     | -1.12    | 1.46        | 0.95 |                                  | -0.17     | -0.61    | 1.47        | 0.86 |
|                                  | GFSv16    |          |             |      |                                  | GFSv16    |          |             |      |
|                                  | -1.33     | -4.79    | 2.05        | 0.94 |                                  | -0.94     | -3.34    | 1.72        | 0.86 |
| Day 3                            | MB (g/kg) | *NMB (%) | RMSE (g/kg) | R    | Day 3                            | MB (g/kg) | *NMB (%) | RMSE (g/kg) | R    |
|                                  | NMMB      |          |             |      |                                  | NMMB      |          |             |      |
|                                  | n/a       | n/a      | n/a         | n/a  |                                  | n/a       | n/a      | n/a         | n/a  |
|                                  | GFSv16    |          |             |      |                                  | GFSv16    |          |             |      |
|                                  | -1.21     | -4.34    | 2.09        | 0.93 |                                  | -0.94     | -3.36    | 1.76        | 0.86 |
| WSPD10: September 2020-East U.S. |           |          |             |      | WSPD10: September 2020-West U.S. |           |          |             |      |
| Day 1                            | MB (m/s)  | *NMB (%) | RMSE (m/s)  | R    | Day 1                            | MB (m/s)  | *NMB (%) | RMSE (m/s)  | R    |
|                                  | NMMB      |          |             |      |                                  | NMMB      |          |             |      |
|                                  | 0.36      | 0.7      | 1.6         | 0.7  |                                  | -0.47     | -1.33    | 1.88        | 0.69 |
|                                  | GFSv16    |          |             |      |                                  | GFSv16    |          |             |      |
|                                  | 0.52      | 1        | 1.69        | 0.69 |                                  | -0.21     | -0.59    | 1.96        | 0.69 |
| Day 2                            | MB (m/s)  | *NMB (%) | RMSE (m/s)  | R    | Day 2                            | MB (m/s)  | *NMB (%) | RMSE (m/s)  | R    |
|                                  | NMMB      |          |             |      |                                  | NMMB      |          |             |      |
|                                  | 0.36      | 0.69     | 1.71        | 0.65 |                                  | -0.46     | -1.3     | 1.98        | 0.66 |
|                                  | GFSv16    |          |             |      |                                  | GFSv16    |          |             |      |
|                                  | 0.49      | 0.96     | 1.79        | 0.65 |                                  | -0.23     | -0.66    | 2.05        | 0.67 |
| Day 3                            | MB (m/s)  | *NMB (%) | RMSE (m/s)  | R    | Day 3                            | MB (m/s)  | *NMB (%) | RMSE (m/s)  | R    |
|                                  | NMMB      |          |             |      |                                  | NMMB      |          |             |      |
|                                  | n/a       | n/a      | n/a         | n/a  |                                  | n/a       | n/a      | n/a         | n/a  |
|                                  | GFSv16    |          |             |      |                                  | GFSv16    |          |             |      |
|                                  | 0.46      | 0.9      | 1.87        | 0.62 |                                  | -0.26     | -0.74    | 2.15        | 0.63 |

\* NMB stats are normalized by observation range.

**Table S4.** Same as in Table S3, but for January 2021.

| TEMP2: January 2021-East U.S.  |           |          |             |      | TEMP2: January 2021-West U.S.  |           |          |             |      |
|--------------------------------|-----------|----------|-------------|------|--------------------------------|-----------|----------|-------------|------|
| Day 1                          | MB (K)    | *NMB (%) | RMSE (K)    | R    | Day 1                          | MB (K)    | *NMB (%) | RMSE (K)    | R    |
|                                | NMMB      |          |             |      |                                | NMMB      |          |             |      |
|                                | -0.03     | -0.04    | 2.08        | 0.97 |                                | -0.68     | -0.95    | 3.05        | 0.93 |
|                                | GFSv16    |          |             |      |                                | GFSv16    |          |             |      |
|                                | -0.19     | -0.27    | 2.27        | 0.97 |                                | -0.3      | -0.41    | 3.33        | 0.92 |
| Day 2                          | MB (K)    | *NMB (%) | RMSE (K)    | R    | Day 2                          | MB (K)    | *NMB (%) | RMSE (K)    | R    |
|                                | NMMB      |          |             |      |                                | NMMB      |          |             |      |
|                                | -0.16     | -0.23    | 2.48        | 0.96 |                                | -0.84     | -1.19    | 3.37        | 0.92 |
|                                | GFSv16    |          |             |      |                                | GFSv16    |          |             |      |
|                                | -0.04     | -0.06    | 2.44        | 0.96 |                                | -0.27     | -0.36    | 3.45        | 0.91 |
| Day 3                          | MB (K)    | NMB (%)  | RMSE (K)    | R    | Day 3                          | MB (K)    | NMB (%)  | RMSE (K)    | R    |
|                                | NMMB      |          |             |      |                                | NMMB      |          |             |      |
|                                | n/a       | n/a      | n/a         | n/a  |                                | n/a       | n/a      | n/a         | n/a  |
|                                | GFSv16    |          |             |      |                                | GFSv16    |          |             |      |
|                                | 0.14      | 0.19     | 2.6         | 0.95 |                                | -0.28     | -0.39    | 3.62        | 0.91 |
| Q2: January 2021-East U.S.     |           |          |             |      | Q2: January 2021-West U.S.     |           |          |             |      |
| Day 1                          | MB (g/kg) | *NMB (%) | RMSE (g/kg) | R    | Day 1                          | MB (g/kg) | *NMB (%) | RMSE (g/kg) | R    |
|                                | NMMB      |          |             |      |                                | NMMB      |          |             |      |
|                                | 0.1       | 0.51     | 0.59        | 0.97 |                                | 0.14      | 0.87     | 0.67        | 0.92 |
|                                | GFSv16    |          |             |      |                                | GFSv16    |          |             |      |
|                                | -0.05     | -0.28    | 0.62        | 0.97 |                                | -0.16     | -0.98    | 0.69        | 0.91 |
| Day 2                          | MB        | *NMB (%) | RMSE        | R    | Day 2                          | MB (g/kg) | *NMB (%) | RMSE (g/kg) | R    |
|                                | NMMB      |          |             |      |                                | NMMB      |          |             |      |
|                                | 0.06      | 0.3      | 0.68        | 0.96 |                                | 0.11      | 0.71     | 0.73        | 0.89 |
|                                | GFSv16    |          |             |      |                                | GFSv16    |          |             |      |
|                                | 0.01      | 0.05     | 0.71        | 0.96 |                                | -0.16     | -1.03    | 0.73        | 0.9  |
| Day 3                          | MB (g/kg) | *NMB (%) | RMSE (g/kg) | R    | Day 3                          | MB (g/kg) | *NMB (%) | RMSE (g/kg) | R    |
|                                | NMMB      |          |             |      |                                | NMMB      |          |             |      |
|                                | n/a       | n/a      | n/a         | n/a  |                                | n/a       | n/a      | n/a         | n/a  |
|                                | GFSv16    |          |             |      |                                | GFSv16    |          |             |      |
|                                | 0.09      | 0.48     | 0.82        | 0.95 |                                | -0.16     | -1       | 0.78        | 0.88 |
| WSPD10: January 2021-East U.S. |           |          |             |      | WSPD10: January 2021-West U.S. |           |          |             |      |
| Day 1                          | MB (m/s)  | *NMB (%) | RMSE (m/s)  | R    | Day 1                          | MB (m/s)  | *NMB (%) | RMSE (m/s)  | R    |
|                                | NMMB      |          |             |      |                                | NMMB      |          |             |      |
|                                | 0.11      | 0.18     | 1.61        | 0.7  |                                | -0.56     | -1.14    | 2.23        | 0.72 |
|                                | GFSv16    |          |             |      |                                | GFSv16    |          |             |      |
|                                | 0.13      | 0.22     | 1.66        | 0.7  |                                | -0.68     | -1.38    | 2.33        | 0.72 |
| Day 2                          | MB (m/s)  | *NMB (%) | RMSE (m/s)  | R    | Day 2                          | MB (m/s)  | *NMB (%) | RMSE (m/s)  | R    |
|                                | NMMB      |          |             |      |                                | NMMB      |          |             |      |
|                                | 0.16      | 0.27     | 1.72        | 0.67 |                                | -0.53     | -1.08    | 2.34        | 0.68 |
|                                | GFSv16    |          |             |      |                                | GFSv16    |          |             |      |
|                                | 0.14      | 0.23     | 1.75        | 0.67 |                                | -0.71     | -1.44    | 2.43        | 0.69 |
| Day 3                          | MB (m/s)  | *NMB (%) | RMSE (m/s)  | R    | Day 3                          | MB (m/s)  | *NMB (%) | RMSE (m/s)  | R    |
|                                | NMMB      |          |             |      |                                | NMMB      |          |             |      |
|                                | n/a       | n/a      | n/a         | n/a  |                                | n/a       | n/a      | n/a         | n/a  |
|                                | GFSv16    |          |             |      |                                | GFSv16    |          |             |      |
|                                | 0.15      | 0.24     | 1.86        | 0.62 |                                | -0.74     | -1.48    | 2.59        | 0.65 |

\* NMB stats are normalized by observation range.

**Table S5.** Average September 2020 hourly O<sub>3</sub> evaluation of the operational NAQFC and NACC-CMAQ Day 2 forecasts against the AirNow network in different CONUS regions (based on <https://www.epa.gov/aboutepa/regional-and-geographic-offices>). Statistical benchmark values based on Emery et al. (2017) are also shown for comparison. Following Emery et al., a >40 ppb (i.e., daytime) cutoff for hourly O<sub>3</sub> is applied for the mean observations, mean models, mean bias, and the calculated values of NMB and NME, but not for the correlation value (r) or index of agreement (IOA). Total # of obs-model pairs are based on all values (i.e., no cutoff). **Bold** indicates statistical values outside of the Emery et al. criteria. **Blue (red)** shading indicates improved (degraded) NACC-CMAQ performance.

| Day 2 Forecasts                      | Total # of Pairs | Mean Obs (ppb) | Mean Mod (ppb) | Mean Bias (ppb) | NMB (%)                       | NME (%)                      | Corr (r)                       | IOA         |
|--------------------------------------|------------------|----------------|----------------|-----------------|-------------------------------|------------------------------|--------------------------------|-------------|
| <b>Benchmark Emery et al. (2017)</b> | -                | -              | -              | -               | Goal: <±5%<br>Criteria: <±15% | Goal: <15%<br>Criteria: <25% | Goal: >0.75<br>Criteria: >0.50 | -           |
| <b>Region 1 (Northeast)</b>          |                  |                |                |                 |                               |                              |                                |             |
| NAQFC                                | 35975            | 46.85          | 42.11          | -4.74           | -10.12                        | 16.69                        | 0.59                           | 0.70        |
| NACC-CMAQ                            |                  |                | 43.14          | <b>-3.71</b>    | <b>-7.92</b>                  | <b>15.45</b>                 | <b>0.70</b>                    | <b>0.81</b> |
| <b>Region 2 (NY-NJ)</b>              |                  |                |                |                 |                               |                              |                                |             |
| NAQFC                                | 22920            | 46.63          | 42.37          | -4.26           | -9.14                         | 17.12                        | 0.56                           | 0.71        |
| NACC-CMAQ                            |                  |                | 44.50          | <b>-2.14</b>    | <b>-4.58</b>                  | <b>15.35</b>                 | <b>0.71</b>                    | <b>0.81</b> |
| <b>Region 3 (Mid-Atlantic)</b>       |                  |                |                |                 |                               |                              |                                |             |
| NAQFC                                | 88924            | 46.62          | 44.01          | -2.60           | -5.59                         | 12.89                        | 0.64                           | 0.72        |
| NACC-CMAQ                            |                  |                | 45.83          | <b>-0.79</b>    | <b>-1.69</b>                  | <b>13.88</b>                 | <b>0.74</b>                    | <b>0.82</b> |
| <b>Region 4 (Southeast)</b>          |                  |                |                |                 |                               |                              |                                |             |
| NAQFC                                | 105832           | 44.52          | 45.62          | 1.10            | 2.46                          | 13.53                        | 0.61                           | 0.65        |
| NACC-CMAQ                            |                  |                | 47.50          | <b>2.98</b>     | <b>6.68</b>                   | <b>15.68</b>                 | <b>0.72</b>                    | <b>0.75</b> |
| <b>Region 5 (Upper Midwest)</b>      |                  |                |                |                 |                               |                              |                                |             |
| NAQFC                                | 109589           | 46.57          | 43.26          | -3.31           | -7.10                         | 13.86                        | 0.67                           | 0.77        |
| NACC-CMAQ                            |                  |                | 46.57          | <b>0.00</b>     | <b>0.01</b>                   | <b>11.29</b>                 | <b>0.76</b>                    | <b>0.83</b> |
| <b>Region 6 (South)</b>              |                  |                |                |                 |                               |                              |                                |             |
| NAQFC                                | 83955            | 48.16          | 46.98          | -1.18           | -2.44                         | 13.77                        | 0.67                           | 0.76        |
| NACC-CMAQ                            |                  |                | 48.21          | <b>0.05</b>     | <b>0.11</b>                   | <b>13.37</b>                 | <b>0.74</b>                    | <b>0.81</b> |
| <b>Region 7 (Central Plains)</b>     |                  |                |                |                 |                               |                              |                                |             |
| NAQFC                                | 27120            | 45.10          | 44.63          | -0.47           | -1.05                         | 10.64                        | 0.77                           | 0.83        |
| NACC-CMAQ                            |                  |                | 47.40          | <b>2.31</b>     | <b>5.11</b>                   | <b>9.74</b>                  | <b>0.81</b>                    | <b>0.85</b> |
| <b>Region 8 (Northern Plains)</b>    |                  |                |                |                 |                               |                              |                                |             |
| NAQFC                                | 51728            | 48.97          | 44.52          | -4.45           | -9.09                         | 14.43                        | 0.69                           | 0.81        |
| NACC-CMAQ                            |                  |                | <b>45.03</b>   | <b>-3.93</b>    | <b>-8.03</b>                  | <b>14.13</b>                 | <b>0.72</b>                    | <b>0.84</b> |
| <b>Region 9 (West)</b>               |                  |                |                |                 |                               |                              |                                |             |
| NAQFC                                | 124039           | 55.59          | 49.48          | -6.11           | -11.00                        | 19.47                        | 0.68                           | 0.78        |
| NACC-CMAQ                            |                  |                | 46.73          | <b>-8.87</b>    | <b>-15.95</b>                 | <b>21.82</b>                 | <b>0.71</b>                    | <b>0.83</b> |
| <b>Region 10 (Northwest)</b>         |                  |                |                |                 |                               |                              |                                |             |
| NAQFC                                | 14128            | 48.31          | 39.21          | -9.10           | <b>-18.83</b>                 | 22.03                        | 0.60                           | 0.71        |

|                  |  |  |       |       |        |       |      |      |
|------------------|--|--|-------|-------|--------|-------|------|------|
| <b>NACC-CMAQ</b> |  |  | 41.46 | -6.84 | -14.17 | 19.86 | 0.66 | 0.81 |
|------------------|--|--|-------|-------|--------|-------|------|------|

**Table S6.** Same as in Table S5, but for MDA8 O<sub>3</sub>. Note: As discussed in Emery et al. (2017), there are no cutoff values applied for MDA8 O<sub>3</sub>.

| <b>Day 2 Forecasts</b>               | <b>Total # of Pairs</b> | <b>Mean Obs (ppb)</b> | <b>Mean Mod (ppb)</b> | <b>Mean Bias (ppb)</b> | <b>NMB (%)</b>                | <b>NME (%)</b>               | <b>Corr (r)</b>                | <b>IOA</b> |
|--------------------------------------|-------------------------|-----------------------|-----------------------|------------------------|-------------------------------|------------------------------|--------------------------------|------------|
| <b>Benchmark Emery et al. (2017)</b> | -                       | -                     | -                     | -                      | Goal: <±5%<br>Criteria: <±15% | Goal: <15%<br>Criteria: <25% | Goal: >0.75<br>Criteria: >0.50 | -          |
| <b>Region 1 (Northeast)</b>          |                         |                       |                       |                        |                               |                              |                                |            |
| NAQFC                                | 1680                    | 33.22                 | 38.12                 | 4.89                   | 14.73                         | 21.68                        | 0.62                           | 0.71       |
| NACC-CMAQ                            |                         |                       | 38.50                 | 5.28                   | 15.90                         | 20.65                        | 0.73                           | 0.76       |
| <b>Region 2 (NY-NJ)</b>              |                         |                       |                       |                        |                               |                              |                                |            |
| NAQFC                                | 1160                    | 33.13                 | 37.37                 | 4.24                   | 12.81                         | 19.95                        | 0.66                           | 0.75       |
| NACC-CMAQ                            |                         |                       | 39.03                 | 5.90                   | 17.81                         | 23.09                        | 0.70                           | 0.75       |
| <b>Region 3 (Mid-Atlantic)</b>       |                         |                       |                       |                        |                               |                              |                                |            |
| NAQFC                                | 4250                    | 34.05                 | 39.43                 | 5.38                   | 15.81                         | 20.52                        | 0.72                           | 0.76       |
| NACC-CMAQ                            |                         |                       | 41.25                 | 7.19                   | 21.13                         | 23.72                        | 0.76                           | 0.76       |
| <b>Region 4 (Southeast)</b>          |                         |                       |                       |                        |                               |                              |                                |            |
| NAQFC                                | 5077                    | 31.02                 | 39.94                 | 8.92                   | 28.75                         | 30.76                        | 0.65                           | 0.65       |
| NACC-CMAQ                            |                         |                       | 40.90                 | 9.88                   | 31.84                         | 33.22                        | 0.71                           | 0.66       |
| <b>Region 5 (Upper Midwest)</b>      |                         |                       |                       |                        |                               |                              |                                |            |
| NAQFC                                | 5210                    | 34.34                 | 37.68                 | 3.34                   | 9.73                          | 18.24                        | 0.74                           | 0.82       |
| NACC-CMAQ                            |                         |                       | 40.36                 | 6.01                   | 17.51                         | 20.50                        | 0.80                           | 0.81       |
| <b>Region 6 (South)</b>              |                         |                       |                       |                        |                               |                              |                                |            |
| NAQFC                                | 3900                    | 35.84                 | 42.23                 | 6.39                   | 17.83                         | 23.60                        | 0.72                           | 0.77       |
| NACC-CMAQ                            |                         |                       | 43.28                 | 7.43                   | 20.74                         | 24.33                        | 0.77                           | 0.78       |
| <b>Region 7 (Central Plains)</b>     |                         |                       |                       |                        |                               |                              |                                |            |
| NAQFC                                | 1255                    | 33.69                 | 37.50                 | 3.81                   | 11.30                         | 16.54                        | 0.81                           | 0.85       |
| NACC-CMAQ                            |                         |                       | 40.00                 | 6.31                   | 18.72                         | 20.50                        | 0.84                           | 0.83       |
| <b>Region 8 (Northern Plains)</b>    |                         |                       |                       |                        |                               |                              |                                |            |
| NAQFC                                | 2378                    | 44.12                 | 43.56                 | -0.56                  | -1.27                         | 13.23                        | 0.73                           | 0.84       |
| NACC-CMAQ                            |                         |                       | 44.91                 | 0.79                   | 1.79                          | 11.84                        | 0.79                           | 0.88       |
| <b>Region 9 (West)</b>               |                         |                       |                       |                        |                               |                              |                                |            |
| NAQFC                                | 5754                    | 51.18                 | 50.73                 | -0.45                  | -0.88                         | 18.85                        | 0.67                           | 0.79       |
| NACC-CMAQ                            |                         |                       | 48.60                 | -2.59                  | -5.05                         | 18.84                        | 0.68                           | 0.79       |
| <b>Region 10 (Northwest)</b>         |                         |                       |                       |                        |                               |                              |                                |            |
| NAQFC                                | 695                     | 33.14                 | 35.62                 | 2.49                   | 7.51                          | 25.12                        | 0.61                           | 0.70       |
| NACC-CMAQ                            |                         |                       | 36.71                 | 3.58                   | 10.80                         | 24.95                        | 0.59                           | 0.74       |

**Table S7.** Same as in Table S5, but for 24-hr average PM<sub>2.5</sub>. Note: As discussed in Emery et al. (2017), there are no cutoff values applied for 24-hr average PM<sub>2.5</sub>.

| Day 2 Forecasts                      | Total # of Pairs | Mean Obs (ppb) | Mean Mod (ppb) | Mean Bias (ppb) | NMB (%)                        | NME (%)                      | Corr (r)                       | IOA  |
|--------------------------------------|------------------|----------------|----------------|-----------------|--------------------------------|------------------------------|--------------------------------|------|
| <b>Benchmark Emery et al. (2017)</b> | -                | -              | -              | -               | Goal: <±10%<br>Criteria: <±30% | Goal: <35%<br>Criteria: <50% | Goal: >0.70<br>Criteria: >0.40 | -    |
| <b>Region 1 (Northeast)</b>          |                  |                |                |                 |                                |                              |                                |      |
| NAQFC                                | 1261             | 7.43           | 8.34           | 0.91            | 12.25                          | 41.43                        | 0.76                           | 0.85 |
| NACC-CMAQ                            |                  |                | 9.36           | 1.93            | 25.98                          | 46.93                        | 0.73                           | 0.82 |
| <b>Region 2 (NY-NJ)</b>              |                  |                |                |                 |                                |                              |                                |      |
| NAQFC                                | 598              | 8.54           | 14.37          | 5.83            | 68.29                          | 79.48                        | 0.73                           | 0.60 |
| NACC-CMAQ                            |                  |                | 10.95          | 2.41            | 28.21                          | 47.05                        | 0.77                           | 0.74 |
| <b>Region 3 (Mid-Atlantic)</b>       |                  |                |                |                 |                                |                              |                                |      |
| NAQFC                                | 1897             | 9.16           | 11.12          | 1.96            | 21.39                          | 38.03                        | 0.78                           | 0.85 |
| NACC-CMAQ                            |                  |                | 10.17          | 1.01            | 10.99                          | 32.62                        | 0.83                           | 0.89 |
| <b>Region 4 (Southeast)</b>          |                  |                |                |                 |                                |                              |                                |      |
| NAQFC                                | 3621             | 8.45           | 9.33           | 0.89            | 10.53                          | 40.10                        | 0.39                           | 0.61 |
| NACC-CMAQ                            |                  |                | 7.92           | -0.53           | -6.23                          | 37.61                        | 0.47                           | 0.66 |
| <b>Region 5 (Upper Midwest)</b>      |                  |                |                |                 |                                |                              |                                |      |
| NAQFC                                | 3270             | 9.61           | 8.67           | -0.94           | -9.74                          | 39.45                        | 0.49                           | 0.70 |
| NACC-CMAQ                            |                  |                | 9.41           | -0.20           | -2.05                          | 32.51                        | 0.68                           | 0.81 |
| <b>Region 6 (South)</b>              |                  |                |                |                 |                                |                              |                                |      |
| NAQFC                                | 2101             | 8.39           | 7.71           | -0.68           | -8.12                          | 46.83                        | 0.26                           | 0.55 |
| NACC-CMAQ                            |                  |                | 6.27           | -2.12           | -25.27                         | 44.98                        | 0.33                           | 0.57 |
| <b>Region 7 (Central Plains)</b>     |                  |                |                |                 |                                |                              |                                |      |
| NAQFC                                | 926              | 8.67           | 8.78           | 0.11            | 1.29                           | 45.72                        | 0.30                           | 0.57 |
| NACC-CMAQ                            |                  |                | 8.86           | 0.19            | 2.22                           | 35.69                        | 0.61                           | 0.77 |
| <b>Region 8 (Northern Plains)</b>    |                  |                |                |                 |                                |                              |                                |      |
| NAQFC                                | 1790             | 7.66           | 3.98           | -3.68           | -48.01                         | 62.79                        | 0.29                           | 0.52 |
| NACC-CMAQ                            |                  |                | 5.11           | -2.55           | -33.24                         | 55.73                        | 0.43                           | 0.64 |
| <b>Region 9 (West)</b>               |                  |                |                |                 |                                |                              |                                |      |
| NAQFC                                | 4118             | 10.09          | 6.77           | -3.32           | -32.94                         | 48.56                        | 0.59                           | 0.72 |
| NACC-CMAQ                            |                  |                | 7.81           | -2.28           | -22.62                         | 52.08                        | 0.54                           | 0.72 |
| <b>Region 10 (Northwest)</b>         |                  |                |                |                 |                                |                              |                                |      |
| NAQFC                                | 3922             | 7.93           | 6.08           | -1.85           | -23.31                         | 75.40                        | 0.19                           | 0.47 |
| NACC-CMAQ                            |                  |                | 6.02           | -1.91           | -24.10                         | 70.44                        | 0.23                           | 0.50 |

**Table S8.** Same as in Table S5, but for the Day 3 forecast hourly O<sub>3</sub>.

| <b>Day 3 Forecasts</b>               | <b>Total # of Pairs</b> | <b>Mean Obs (ppb)</b> | <b>Mean Mod (ppb)</b> | <b>Mean Bias (ppb)</b> | <b>NMB (%)</b>                | <b>NME (%)</b>               | <b>Corr (r)</b>                | <b>IOA</b> |
|--------------------------------------|-------------------------|-----------------------|-----------------------|------------------------|-------------------------------|------------------------------|--------------------------------|------------|
| <b>Benchmark Emery et al. (2017)</b> | -                       | -                     | -                     | -                      | Goal: <±5%<br>Criteria: <±15% | Goal: <15%<br>Criteria: <25% | Goal: >0.75<br>Criteria: >0.50 | -          |
| <b>Region 1 (Northeast)</b>          |                         |                       |                       |                        |                               |                              |                                |            |
| NAQFC                                | n.a.                    | n.a.                  | n.a.                  | n.a.                   | n.a.                          | n.a.                         | n.a.                           | n.a.       |
| NACC-CMAQ                            | 35903                   | 46.72                 | 43.66                 | -3.06                  | -6.55                         | 15.97                        | 0.68                           | 0.79       |
| <b>Region 2 (NY-NJ)</b>              |                         |                       |                       |                        |                               |                              |                                |            |
| NAQFC                                | n.a.                    | n.a.                  | n.a.                  | n.a.                   | n.a.                          | n.a.                         | n.a.                           | n.a.       |
| NACC-CMAQ                            | 23116                   | 46.60                 | 44.53                 | -2.07                  | -4.45                         | 14.64                        | 0.71                           | 0.81       |
| <b>Region 3 (Mid-Atlantic)</b>       |                         |                       |                       |                        |                               |                              |                                |            |
| NAQFC                                | n.a.                    | n.a.                  | n.a.                  | n.a.                   | n.a.                          | n.a.                         | n.a.                           | n.a.       |
| NACC-CMAQ                            | 88703                   | 46.62                 | 45.74                 | -0.89                  | -1.90                         | 13.94                        | 0.72                           | 0.81       |
| <b>Region 4 (Southeast)</b>          |                         |                       |                       |                        |                               |                              |                                |            |
| NAQFC                                | n.a.                    | n.a.                  | n.a.                  | n.a.                   | n.a.                          | n.a.                         | n.a.                           | n.a.       |
| NACC-CMAQ                            | 105520                  | 44.68                 | 47.21                 | 2.53                   | 5.67                          | 15.69                        | 0.70                           | 0.75       |
| <b>Region 5 (Upper Midwest)</b>      |                         |                       |                       |                        |                               |                              |                                |            |
| NAQFC                                | n.a.                    | n.a.                  | n.a.                  | n.a.                   | n.a.                          | n.a.                         | n.a.                           | n.a.       |
| NACC-CMAQ                            | 108852                  | 46.62                 | 46.34                 | -0.28                  | -0.60                         | 11.48                        | 0.74                           | 0.82       |
| <b>Region 6 (South)</b>              |                         |                       |                       |                        |                               |                              |                                |            |
| NAQFC                                | n.a.                    | n.a.                  | n.a.                  | n.a.                   | n.a.                          | n.a.                         | n.a.                           | n.a.       |
| NACC-CMAQ                            | 83883                   | 48.18                 | 48.30                 | 0.13                   | 0.26                          | 13.50                        | 0.74                           | 0.81       |
| <b>Region 7 (Central Plains)</b>     |                         |                       |                       |                        |                               |                              |                                |            |
| NAQFC                                | n.a.                    | n.a.                  | n.a.                  | n.a.                   | n.a.                          | n.a.                         | n.a.                           | n.a.       |
| NACC-CMAQ                            | 27070                   | 45.11                 | 46.98                 | 1.87                   | 4.15                          | 11.04                        | 0.79                           | 0.84       |
| <b>Region 8 (Northern Plains)</b>    |                         |                       |                       |                        |                               |                              |                                |            |
| NAQFC                                | n.a.                    | n.a.                  | n.a.                  | n.a.                   | n.a.                          | n.a.                         | n.a.                           | n.a.       |
| NACC-CMAQ                            | 51645                   | 48.99                 | 44.89                 | -4.10                  | -8.36                         | 14.04                        | 0.71                           | 0.84       |
| <b>Region 9 (West)</b>               |                         |                       |                       |                        |                               |                              |                                |            |
| NAQFC                                | n.a.                    | n.a.                  | n.a.                  | n.a.                   | n.a.                          | n.a.                         | n.a.                           | n.a.       |
| NACC-CMAQ                            | 123816                  | 55.68                 | 46.60                 | -9.09                  | <b>-16.32</b>                 | 22.38                        | 0.71                           | 0.83       |
| <b>Region 10 (Northwest)</b>         |                         |                       |                       |                        |                               |                              |                                |            |
| NAQFC                                | n.a.                    | n.a.                  | n.a.                  | n.a.                   | n.a.                          | n.a.                         | n.a.                           | n.a.       |
| NACC-CMAQ                            | 14065                   | 48.41                 | 41.64                 | -6.77                  | -13.99                        | 19.59                        | 0.65                           | 0.80       |



**Table S9.** Same as in Table S5, but for Day 3 forecast MDA8 O<sub>3</sub>. Note: As discussed in Emery et al. (2017), there are no cutoff values applied for MDA8 O<sub>3</sub>.

| Day 3 Forecasts                      | Total # of Pairs | Mean Obs (ppb) | Mean Mod (ppb) | Mean Bias (ppb) | NMB (%)                       | NME (%)                      | Corr (r)                       | IOA  |
|--------------------------------------|------------------|----------------|----------------|-----------------|-------------------------------|------------------------------|--------------------------------|------|
| <b>Benchmark Emery et al. (2017)</b> | -                | -              | -              | -               | Goal: <±5%<br>Criteria: <±15% | Goal: <15%<br>Criteria: <25% | Goal: >0.75<br>Criteria: >0.50 | -    |
| <b>Region 1 (Northeast)</b>          |                  |                |                |                 |                               |                              |                                |      |
| NAQFC                                | n.a.             | n.a.           | n.a.           | n.a.            | n.a.                          | n.a.                         | n.a.                           | n.a. |
| NACC-CMAQ                            | 1680             | 33.40          | 39.21          | 5.80            | <b>17.37</b>                  | 22.09                        | 0.68                           | 0.73 |
| <b>Region 2 (NY-NJ)</b>              |                  |                |                |                 |                               |                              |                                |      |
| NAQFC                                | n.a.             | n.a.           | n.a.           | n.a.            | n.a.                          | n.a.                         | n.a.                           | n.a. |
| NACC-CMAQ                            | 1161             | 33.11          | 38.83          | 5.72            | <b>17.26</b>                  | 21.61                        | 0.73                           | 0.77 |
| <b>Region 3 (Mid-Atlantic)</b>       |                  |                |                |                 |                               |                              |                                |      |
| NAQFC                                | n.a.             | n.a.           | n.a.           | n.a.            | n.a.                          | n.a.                         | n.a.                           | n.a. |
| NACC-CMAQ                            | 4253             | 34.13          | 40.90          | 6.77            | <b>19.84</b>                  | 22.97                        | 0.73                           | 0.76 |
| <b>Region 4 (Southeast)</b>          |                  |                |                |                 |                               |                              |                                |      |
| NAQFC                                | n.a.             | n.a.           | n.a.           | n.a.            | n.a.                          | n.a.                         | n.a.                           | n.a. |
| NACC-CMAQ                            | 5077             | 31.00          | 40.24          | 9.24            | <b>29.82</b>                  | 31.97                        | 0.69                           | 0.68 |
| <b>Region 5 (Upper Midwest)</b>      |                  |                |                |                 |                               |                              |                                |      |
| NAQFC                                | n.a.             | n.a.           | n.a.           | n.a.            | n.a.                          | n.a.                         | n.a.                           | n.a. |
| NACC-CMAQ                            | 5159             | 34.50          | 40.54          | 6.04            | <b>17.49</b>                  | 20.86                        | 0.77                           | 0.79 |
| <b>Region 6 (South)</b>              |                  |                |                |                 |                               |                              |                                |      |
| NAQFC                                | n.a.             | n.a.           | n.a.           | n.a.            | n.a.                          | n.a.                         | n.a.                           | n.a. |
| NACC-CMAQ                            | 3900             | 35.66          | 43.18          | 7.52            | <b>21.08</b>                  | <b>25.10</b>                 | 0.75                           | 0.77 |
| <b>Region 7 (Central Plains)</b>     |                  |                |                |                 |                               |                              |                                |      |
| NAQFC                                | n.a.             | n.a.           | n.a.           | n.a.            | n.a.                          | n.a.                         | n.a.                           | n.a. |
| NACC-CMAQ                            | 1256             | 33.64          | 39.69          | 6.05            | <b>17.98</b>                  | 20.86                        | 0.79                           | 0.82 |
| <b>Region 8 (Northern Plains)</b>    |                  |                |                |                 |                               |                              |                                |      |
| NAQFC                                | n.a.             | n.a.           | n.a.           | n.a.            | n.a.                          | n.a.                         | n.a.                           | n.a. |
| NACC-CMAQ                            | 2379             | 44.23          | 44.86          | 0.63            | 1.42                          | 11.66                        | 0.78                           | 0.88 |
| <b>Region 9 (West)</b>               |                  |                |                |                 |                               |                              |                                |      |
| NAQFC                                | n.a.             | n.a.           | n.a.           | n.a.            | n.a.                          | n.a.                         | n.a.                           | n.a. |
| NACC-CMAQ                            | 5758             | 51.25          | 48.64          | -2.61           | -5.10                         | 19.22                        | 0.66                           | 0.78 |
| <b>Region 10 (Northwest)</b>         |                  |                |                |                 |                               |                              |                                |      |
| NAQFC                                | n.a.             | n.a.           | n.a.           | n.a.            | n.a.                          | n.a.                         | n.a.                           | n.a. |
| NACC-CMAQ                            | 697              | 33.22          | 37.03          | 3.81            | 11.46                         | <b>25.09</b>                 | 0.57                           | 0.73 |

**Table S10.** Same as in Table S5, but for Day 3 forecast 24-hr average PM<sub>2.5</sub>. Note: As discussed in Emery et al. (2017), there are no cutoff values applied for 24-hr average PM<sub>2.5</sub>.

| Day 3 Forecasts                      | Total # of Pairs | Mean Obs (ppb) | Mean Mod (ppb) | Mean Bias (ppb) | NMB (%)                        | NME (%)                      | Corr (r)                       | IOA  |
|--------------------------------------|------------------|----------------|----------------|-----------------|--------------------------------|------------------------------|--------------------------------|------|
| <b>Benchmark Emery et al. (2017)</b> | -                | -              | -              | -               | Goal: <±10%<br>Criteria: <±30% | Goal: <35%<br>Criteria: <50% | Goal: >0.70<br>Criteria: >0.40 | -    |
| <b>Region 1 (Northeast)</b>          |                  |                |                |                 |                                |                              |                                |      |
| NAQFC                                | n.a.             | n.a.           | n.a.           | n.a.            | n.a.                           | n.a.                         | n.a.                           | n.a. |
| NACC-CMAQ                            | 1261             | 7.43           | 9.41           | 1.98            | 26.60                          | <b>50.07</b>                 | 0.73                           | 0.81 |
| <b>Region 2 (NY-NJ)</b>              |                  |                |                |                 |                                |                              |                                |      |
| NAQFC                                | n.a.             | n.a.           | n.a.           | n.a.            | n.a.                           | n.a.                         | n.a.                           | n.a. |
| NACC-CMAQ                            | 598              | 8.54           | 10.80          | 2.26            | 26.42                          | 45.71                        | 0.79                           | 0.78 |
| <b>Region 3 (Mid-Atlantic)</b>       |                  |                |                |                 |                                |                              |                                |      |
| NAQFC                                | n.a.             | n.a.           | n.a.           | n.a.            | n.a.                           | n.a.                         | n.a.                           | n.a. |
| NACC-CMAQ                            | 1897             | 9.16           | 10.10          | 0.94            | 10.24                          | 32.91                        | 0.82                           | 0.89 |
| <b>Region 4 (Southeast)</b>          |                  |                |                |                 |                                |                              |                                |      |
| NAQFC                                | n.a.             | n.a.           | n.a.           | n.a.            | n.a.                           | n.a.                         | n.a.                           | n.a. |
| NACC-CMAQ                            | 3621             | 8.45           | 8.09           | -0.36           | -4.25                          | 40.40                        | 0.45                           | 0.64 |
| <b>Region 5 (Upper Midwest)</b>      |                  |                |                |                 |                                |                              |                                |      |
| NAQFC                                | n.a.             | n.a.           | n.a.           | n.a.            | n.a.                           | n.a.                         | n.a.                           | n.a. |
| NACC-CMAQ                            | 3270             | 9.61           | 9.23           | -0.37           | -3.87                          | 34.63                        | 0.63                           | 0.79 |
| <b>Region 6 (South)</b>              |                  |                |                |                 |                                |                              |                                |      |
| NAQFC                                | n.a.             | n.a.           | n.a.           | n.a.            | n.a.                           | n.a.                         | n.a.                           | n.a. |
| NACC-CMAQ                            | 2101             | 8.39           | 6.24           | -2.15           | -25.58                         | 46.79                        | <b>0.31</b>                    | 0.56 |
| <b>Region 7 (Central Plains)</b>     |                  |                |                |                 |                                |                              |                                |      |
| NAQFC                                | n.a.             | n.a.           | n.a.           | n.a.            | n.a.                           | n.a.                         | n.a.                           | n.a. |
| NACC-CMAQ                            | 926              | 8.67           | 8.65           | -0.02           | -0.25                          | 37.08                        | 0.57                           | 0.74 |
| <b>Region 8 (Northern Plains)</b>    |                  |                |                |                 |                                |                              |                                |      |
| NAQFC                                | n.a.             | n.a.           | n.a.           | n.a.            | n.a.                           | n.a.                         | n.a.                           | n.a. |
| NACC-CMAQ                            | 1790             | 7.66           | 5.12           | -2.53           | <b>-33.09</b>                  | <b>55.27</b>                 | 0.44                           | 0.64 |
| <b>Region 9 (West)</b>               |                  |                |                |                 |                                |                              |                                |      |
| NAQFC                                | n.a.             | n.a.           | n.a.           | n.a.            | n.a.                           | n.a.                         | n.a.                           | n.a. |
| NACC-CMAQ                            | 4118             | 10.09          | 7.55           | -2.54           | -25.15                         | <b>52.82</b>                 | 0.52                           | 0.70 |
| <b>Region 10 (Northwest)</b>         |                  |                |                |                 |                                |                              |                                |      |
| NAQFC                                | n.a.             | n.a.           | n.a.           | n.a.            | n.a.                           | n.a.                         | n.a.                           | n.a. |
| NACC-CMAQ                            | 3922             | 7.93           | 5.90           | -2.03           | -25.60                         | <b>70.57</b>                 | <b>0.23</b>                    | 0.49 |
